# Supplementary material for: Prevalence of common mental health disorders in adults who are high or costly users of healthcare services: protocol for a systematic review and meta-analysis
Source: PubMed Central journal article supplement — BMJ Open. 2019 Sep 4;9(9):e028295. doi: 10.1136/bmjopen-2018-028295 (PMC6731873; doi:10.1136/bmjopen-2018-028295), 2019-09-04
Supplement: bmjopen-2018-028295.draft_revisions.pdf [file bmjopen-2018-028295.draft_revisions.pdf]

# BMJ Open

BMJ Open is committed to open peer review. As part of this commitment we make the peer review history of every article we publish publicly available.

When an article is published we post the peer reviewers' comments and the authors' responses online. We also post the versions of the paper that were used during peer review. These are the versions that the peer review comments apply to.

The versions of the paper that follow are the versions that were submitted during the peer review process. They are not the versions of record or the final published versions. They should not be cited or distributed as the published version of this manuscript.

BMJ Open is an open access journal and the full, final, typeset and author-corrected version of record of the manuscript is available on our site with no access controls, subscription charges or pay-per-view fees (<http://bmjopen.bmj.com>).

If you have any questions on BMJ Open's open peer review process please email [info.bmjopen@bmj.com](mailto:info.bmjopen@bmj.com)

# BMJ Open

## The prevalence of common mental health disorders in adults who are high or costly users of health care services: A systematic review and meta-analysis

|                               |                                                                                                                                                                                                                                                                                                                                                                                                                                                                                                                                                                                                           |
|-------------------------------|-----------------------------------------------------------------------------------------------------------------------------------------------------------------------------------------------------------------------------------------------------------------------------------------------------------------------------------------------------------------------------------------------------------------------------------------------------------------------------------------------------------------------------------------------------------------------------------------------------------|
| Journal:                      | <i>BMJ Open</i>                                                                                                                                                                                                                                                                                                                                                                                                                                                                                                                                                                                           |
| Manuscript ID                 | bmjopen-2018-028295                                                                                                                                                                                                                                                                                                                                                                                                                                                                                                                                                                                       |
| Article Type:                 | Protocol                                                                                                                                                                                                                                                                                                                                                                                                                                                                                                                                                                                                  |
| Date Submitted by the Author: | 30-Nov-2018                                                                                                                                                                                                                                                                                                                                                                                                                                                                                                                                                                                               |
| Complete List of Authors:     | Jadhakhan, Ferozkhan; University of Birmingham, Institute of Mental Health, School of Psychology, College of Life and Environmental Sciences; Birmingham and Solihull Mental Health NHS Foundation Trust, Research and Innovation<br>Linder, Oana; University of Leeds, Division of Psychological and Social Medicine, Leeds Institute of Health Sciences, School of Medicine, Level 10, Worsley Building, Clarendon Way, University of Leeds<br>Blakemore, Amy; University of Manchester,<br>Guthrie, Elspeth; University of Leeds Leeds Institute of Health Sciences, Psychological and Social Medicine |
| Keywords:                     | Common Mental Health Disorders, Depression, Anxiety, Health Care Utilisation, High Cost, High Health Care Cost                                                                                                                                                                                                                                                                                                                                                                                                                                                                                            |
|                               |                                                                                                                                                                                                                                                                                                                                                                                                                                                                                                                                                                                                           |

SCHOLARONE™  
Manuscripts

1  
2  
3 The prevalence of common mental health disorders in adults who are high or  
4 costly users of health care services: A systematic review and meta-analysis  
5  
6

---

7 Dr Ferozkhan Jadhakhan<sup>1, 2\*</sup>, Dr Oana C Lindner<sup>3\*</sup>, Dr Amy Blakemore<sup>4</sup>, Professor Elspeth A  
8 Guthrie<sup>3</sup>  
9

10  
11 Correspondence author: Dr Ferozkhan Jadhakhan, [F.Jadhakhan@bham.ac.uk](mailto:F.Jadhakhan@bham.ac.uk)  
12  
13

14 \*Dr Jadhakhan and Dr Lindner are joint first authors of this manuscript.  
15  
16

- 17 1. Institute of Mental Health, School of Psychology, College of Life and Environmental  
18 Sciences, 52, Pritchatts Road, Edgbaston, University of Birmingham, Birmingham,  
19 UK  
20
- 21 2. Birmingham and Solihull Mental Health NHS Foundation Trust, The Barberry,  
22 Research and Innovation, 25, Vincent Drive, Edgbaston, Birmingham, B15 2FG, UK  
23  
24
- 25 3. Division of Psychological and Social Medicine, Leeds Institute of Health Sciences,  
26 School of Medicine, Level 10, Worsley Building, Clarendon Way, University of  
27 Leeds, Leeds, LS2 9NL, UK.  
28  
29
- 30 4. Division of Nursing, Social Work and Midwifery, School of Health Sciences,  
31 Manchester Academic Health Science Centre, The University of Manchester, Jean  
32 McFarlane Building, Oxford Road, Manchester, M13 9PL, UK  
33  
34  
35  
36

37 Email: Dr Oana C Lindner: [O.C.Lindner@leeds.ac.uk](mailto:O.C.Lindner@leeds.ac.uk) – Dr Ferozkhan Jadhakhan: [F.Jadhakhan@bham.ac.uk](mailto:F.Jadhakhan@bham.ac.uk)  
38 Dr Amy Blakemore: [amy.blakemore@manchester.ac.uk](mailto:amy.blakemore@manchester.ac.uk) – Professor Elspeth A Guthrie:  
39 [E.A.Guthrie@leeds.ac.uk](mailto:E.A.Guthrie@leeds.ac.uk)  
40  
41  
42  
43  
44  
45  
46  
47  
48  
49  
50  
51  
52  
53  
54  
55  
56  
57  
58  
59  
60

Word count: 2,293

1  
2  
3 **Keywords:** Common Mental Health Disorders, Depression, Anxiety, Health Care Utilisation,  
4  
5 High Cost, High Health Care Cost, Frequent Attenders, Prevalence  
6  
7  
8  
9  
10  
11  
12  
13  
14  
15  
16  
17  
18  
19  
20  
21  
22  
23  
24  
25  
26  
27  
28  
29  
30  
31  
32  
33  
34  
35  
36  
37  
38  
39  
40  
41  
42  
43  
44  
45  
46  
47  
48  
49  
50  
51  
52  
53  
54  
55  
56  
57  
58  
59  
60

For peer review only

## Abstract

**Introduction:** In all health care settings, a small proportion of patients account for a large proportion of health care use and associated high health care costs. Common mental health disorders, such as anxiety and depression, especially when unmanaged, are a source of frequent primary and secondary care appointments. The aim of this systematic review is to determine the prevalence and magnitude of depression and anxiety in adults who are high users of physical health care services and who accrue high health care costs.

**Methods and Analysis:** This review will include any studies where patients are high users of primary and secondary health care services and/or accrue high health care costs. We will focus on patients who are over the age of 18 and whose level of anxiety and/or depression has been evaluated with a standardized questionnaire or clinical interview. The review will include eligible studies indexed in MEDLINE, PsychINFO, EMBASE, CINAHL, PROSPERO, Cochrane Library from inception to June 2018. We will estimate the prevalence of anxiety or depression in these populations, the level of health care use and health care costs, together with the associated 95% confidence intervals. We will provide a narrative description of results; a meta-analysis will be pursued if sufficient homogeneous studies are identified.

**Ethics and dissemination:** This systematic review will use data from existing studies, hence no ethical approvals are required. Findings will be disseminated in peer-reviewed publications and in national and international conferences.

**PROSPERO Registration number:** CRD42018102628

**Strengths and Limitations:**

1. This systematic review is not restricted to studies published in English or by publication date.
2. Potential studies will be identified through a wide range of databases.
3. The search strategy uses a broad terminology to ensure a comprehensive inclusion of studies focusing on distressed high users in general health care settings and the associated magnitude of health care use and costs.
4. Study screening, selection, data extraction, and study quality evaluation will be pursued independently by two reviewers.
5. We will provide a narrative summary of findings and describe limitations of prior research in this area. If possible we will conduct a meta-analysis. However, this may not be possible if we find a limited number of studies or a high heterogeneity in outcomes.

## Introduction

Across health care systems, a small proportion of the patient population accounts for a large proportion of health care use and cost [1]. These findings have consistently emerged from studies of general practice (GP) attendances [1–4], inpatient length of stay [5,6], outpatient appointments [7,8], A&E services [9–12]. In primary care, approximately 5% of ‘frequent attenders’ can account for up to 50% of all consultations [13]. In secondary care, 5% of the top users consume 30–40% of the resources [14]. This has been estimated to amount to more than \$30 billion of total annual health care expenditures [13–17].

It has been suggested that approximately 50% of high users of health care in the primary and secondary care settings have significant mental health problems, either alone or, in addition, to physical health needs, and have been termed ‘distressed high users’ [15,18]. High use of health care services have been associated with a variety of different mental health problems including multiple psychiatric diagnoses [8,19,20], long histories of psychological ill health/social adversity [2,10,21,22], history of childhood abuse or neglect [23], or addictions [24]. Despite this evidence, the prevalence of anxiety/depression in these populations and the costs associated with their medical use are unclear. The aim of this review is to determine the prevalence of anxiety and/or depression in patients who are high users of health care services, or accrue high health care costs, and to estimate the frequency and costs of their medical use.

### Aims:

This systematic review will aim to: (1) determine the prevalence of anxiety and/or depression in adults over 18 years old, who are high users of health care or accrue high health care costs; (2) determine the magnitude of health care use and the magnitude of health care costs associated with the presence of anxiety and/or depression.

## Methods and design

*Population:* This review will include studies focusing on adults aged  $\geq 18$  years, who are high users of health care services or accrue high health care costs, and whose level of depression or anxiety have been evaluated through standardized questionnaires or clinical interviews. We will focus on patients seen in general health care settings, such as primary, secondary, tertiary care, A&E/emergency departments. We will not include studies with populations seen in the context of psychiatric or mental health services for a primary diagnosis of a psychiatric condition (i.e. psychosis, schizophrenia) given that the aim is to estimate the prevalence of anxiety/depression in general health care. While we will include patients seen in the general hospital, accident and emergency, and primary care settings, we will not include specific medical or surgical specialties, or specific disease conditions (e.g. palliative care, obstetrics, genetics, pharmacology, transplant, surgery, neurodegenerative diseases, oral and maxillofacial, dentistry, nephrology, infectious diseases, virology (including HIV/AIDS-related studies), nephrology, physiotherapy, infectious diseases, and cosmetic surgery).

*Interventions:* We will include studies evaluating naturalistic general health service interventions for emotional distress in high need, high cost frequent attenders in any of the health care settings detailed above. We will exclude clinical trials given their selective selection criteria. We will also exclude studies that only focus on comparing the costs or performance of screening, diagnosis, instrument development, vaccination, development/implementation or evaluation of new health care services not related to high cost/frequent health care users.

*Comparators:* We will include studies comparing groups of patients with an average cost/use of health care versus those defined as high cost/frequent users. We will also include studies comparing patients with and without high levels of anxiety/depression.



1  
2  
3 *Outcomes:* The primary outcome will be the prevalence of anxiety/depression in high users of  
4 general health care services. The secondary outcome will focus on the costs associated with  
5 the high use of health care services in this population.  
6  
7  
8  
9

10 *Study designs:* We will include both retrospective and prospective cohort studies, case-  
11 control, and cross-sectional studies as well as any previous meta-analyses related to our topic.  
12  
13 We will exclude case studies and randomized controlled trials.  
14  
15  
16  
17

## 18 **Search Strategy**

19  
20  
21 *Study search:* We will screen the five databases that are most likely to include studies  
22 focusing on our outcomes of interest: Medline, Embase, CINAHL, PROSPERO, and the  
23 Cochrane Library, from inception to June 2018. The search will include all languages;  
24 translations will be pursued through by co-authors, where possible, or through colleagues in  
25 our international universities. The search will be restricted to studies with adults over the age  
26 of 18. We will also hand search the references of recent reviews. For each databases queried,  
27 we will divide our search strategy into three parts. Search terms within the first part will aim  
28 to identify studies pertaining to all healthcare settings of interest (see search terms for  
29 Medline in Appendix 1). The second part will focus on terms related to high cost or  
30 high/frequent use of health care services. The final part will focus our search on studies  
31 evaluating anxiety/depression.  
32  
33  
34  
35  
36  
37  
38  
39  
40  
41  
42  
43  
44  
45  
46  
47

48 *Eligibility screening:* Studies identified in all the databases will be organised using the  
49 EndNote reference management software. Duplicates will be identified and removed.  
50  
51  
52  
53

## 54 **Study selection**

55  
56  
57 Titles and abstracts will be screened independently by two reviewers. Remaining full-text  
58 articles will be further screened and evaluated for their eligibility. Any disagreement over  
59  
60

eligibility will be resolved through discussions with a third reviewer. We have developed a comprehensive inclusion criteria checklist (Table 1) to ensure consistency in the review process and adherence to the PRIMSA guidelines (Preferred Reporting Items for Systematic Reviews and Meta-Analyses)[25]; we will also provide a PRISMA flow-chart depicting the study selection and inclusion process.

**Table 1: Eligibility criteria checklist based on the PRISMA guidelines**

|                       |                                                                                                                                                                                                                                                        |
|-----------------------|--------------------------------------------------------------------------------------------------------------------------------------------------------------------------------------------------------------------------------------------------------|
| Study design          | Cohort studies (Retrospective and Prospective)<br>Case-control and nested case-control studies<br>Cross-sectional studies                                                                                                                              |
| Study characteristics | Full articles<br>Reference lists of any recent review article<br>Eligible manuscript identified by the database search                                                                                                                                 |
| Participants          | Adult aged ( $\geq 18$ years)<br>High user of health care<br>Accrue high health care costs<br>Presence of anxiety/depression                                                                                                                           |
| Comparator            | Non-high cost and non-high users of health care                                                                                                                                                                                                        |
| Outcome               | Prevalence of anxiety/depression<br>Patients characteristics and context associated with high service usage/costs among patients with anxiety/depression<br>Magnitude of cost or use of health care associated with the presence of anxiety/depression |

### Quality assessment

Quality assessment will be carried out independently by two reviewers through an adapted Newcastle-Ottawa Scale [26] (NOS, Appendix 2). Assessment of study quality will include sampling methods, sample size, method of outcome evaluation (i.e. evaluation of anxiety/depression through one or multiple methods), participant attrition, and analytical method. The adapted NOS quality assessment form will first be piloted on known papers to ascertain its feasibility. Opinion differences will be resolved by consensus or by involving a third reviewer, as necessary. Risk of bias will be evaluated commensurate with the recommendations of the Cochrane Collaboration [27]. It will be reported in a categorical format, with 'yes' indicating high risk 'no' low risk or 'unclear' for each pre-defined domain.

1  
2  
3 We will provide a descriptive account of the study quality and risk of bias for each study  
4 included in our review. If a meta-analysis were to be pursued, low quality studies will be  
5 removed during the sensitivity analyses.  
6  
7  
8  
9

### 10 **Data extraction**

11  
12  
13 Following the selection of relevant full-text articles, two reviewers will independently extract  
14 relevant information in a data extraction form. The latter will be designed based on Hayden et  
15 al.'s framework [28] (Appendix 3); it will be developed iteratively and first piloted on known  
16 papers, by two reviewers, before performing the data extraction for all studies.  
17  
18  
19  
20  
21  
22

### 23 **Data analysis and synthesis**

24  
25  
26 The primary outcome will be the prevalence of anxiety/depression in high and/or costly users  
27 of health care services. The secondary outcomes will include a quantification of the use and  
28 costs associated with these patients. Data analysis will employ descriptive statistics and  
29 narrative synthesis, as appropriate. Quantitative summaries will include standardised mean  
30 differences with associated 95% confidence intervals, and median odds, depending on the  
31 primary data. If sufficient studies using comparable outcomes are available, we will pursue a  
32 meta-analysis. Where possible subgroup analyses will be pursued based on expected study  
33 differences related to: 1) type of outcome measurement for depression/anxiety (clinical  
34 interview versus self-report questionnaires) and 2) healthcare setting (primary care,  
35 secondary care, emergency department). Sensitivity analyses will include effect size  
36 estimates of prevalence and costs in high and low quality studies. Heterogeneity will be  
37 estimated using the Q-test and  $I^2$  test with 95% confidence intervals and publication bias will  
38 be estimated through Egger's test.  
39  
40  
41  
42  
43  
44  
45  
46  
47  
48  
49  
50  
51  
52  
53  
54  
55  
56  
57  
58  
59  
60

### **Patient and public involvement statement**

Patients and the public were not invited to contribute to the writing or editing of this systematic review protocol. The research question of this review was informed by the lack of relevant literature examining the prevalence and magnitude of depression and anxiety in adults who are high users of physical health care services and who accrue high health care

### **Discussion**

The purpose of this systematic review is to estimate the prevalence of anxiety/depression in people who are frequent, high cost users of general health care services, and then to generate the estimated level of health care use and associated costs in different medical settings.

While evidence is available suggesting that a small percentage of the population accrues the highest costs, it is unclear to date to what extent the costs and usage may be due to undiagnosed or un-managed common mental health problems. By examining the information available to date we aim to describe the strengths and limitations of prior literature in terms of sample sizes, methodological approaches, instruments employed, methods of evaluating frequency of attendances, and health care costs.

To our knowledge there are no similar comprehensive reviews that address the same question and we expect the studies we identify to be heterogeneous. However, to be able to offer a complete image, we will employ a highly robust literature search, using both key words and MeSH terms, refined with the support of local librarians. Other strengths of this review are that it includes all studies published in any language without a time limit, and the independent study identification, selection, and data extraction pursued by two reviewers.

### **Implications of results**

The results of this systematic review will provide an estimate of the prevalence of common mental health disorders in high users of health care services, while also providing an estimate

1  
2  
3 of costs associated with the higher use. This critical review of available evidence may  
4 highlight the need for more robust research in this area. It may also reveal an unmet need in  
5 the diagnosis and appropriate management of anxiety/depression in populations routinely  
6 seen in general health care settings. This review will provide an overview of the burden  
7 associated with a prevalence of poorly identified or managed anxiety/depression in patients  
8 who are routinely managed in physical health care settings. Hence, it could suggest the type  
9 of integrated, collaborative services, or management methods that may be needed for people  
10 who suffer from either acute or chronic physical illnesses, who are routinely managed in the  
11 physical health care setting, but also have a mental health concerns.  
12  
13  
14  
15  
16  
17  
18  
19  
20  
21  
22  
23  
24  
25  
26  
27  
28  
29  
30  
31  
32  
33  
34  
35  
36  
37  
38  
39  
40  
41  
42  
43  
44  
45  
46  
47  
48  
49  
50  
51  
52  
53  
54  
55  
56  
57  
58  
59  
60

## References

- 1 Rosella LC, Fitzpatrick T, Wodchis WP, *et al.* High-cost health care users in Ontario, Canada: Demographic, socio-economic, and health status characteristics. *BMC Health Serv Res* Published Online First: 2014. doi:10.1186/s12913-014-0532-2
- 2 Reid R, Evans R, Barer M, *et al.* Conspicuous consumption: Characterizing high users of physician services in one Canadian province. *J Heal Serv Res Policy* Published Online First: 2003. doi:10.1258/135581903322403281
- 3 Hochman M, Asch SM. Disruptive Models in Primary Care: Caring for High-Needs, High-Cost Populations. *J Gen Intern Med* Published Online First: 2017. doi:10.1007/s11606-016-3945-2
- 4 Rais S, Nazerian A, Ardal S, *et al.* High-cost users of Ontario's healthcare services. *Healthc Policy* Published Online First: 2013. doi:10.12927/hcpol.2013.23478
- 5 Zook CJ, Moore FD. High-Cost Users of Medical Care. *N Engl J Med* Published Online First: 1980. doi:10.1056/NEJM198005013021804
- 6 Calver J, Bramweld KJ, Preen DB, *et al.* High-cost users of hospital beds in Western Australia: A population-based record linkage study. *Med J Aust* 2006.
- 7 Kimerling R, Ouimette PC, Cronkite RC, *et al.* Depression and outpatient medical utilization: A naturalistic 10-year follow-up. *Ann Behav Med* Published Online First: 1999. doi:10.1007/BF02895964
- 8 Katon WJ. Clinical and health services relationships between major depression, depressive symptoms, and general medical illness. *Biol. Psychiatry*. 2003. doi:10.1016/S0006-3223(03)00273-7
- 9 Ruger JP, Richter CJ, Spitznagel EL, *et al.* Analysis of costs, length of stay, and

- 1  
2  
3 utilization of emergency department services by frequent users: Implications for health  
4 policy. *Acad Emerg Med* Published Online First: 2004. doi:10.1197/j.aem.2004.07.008  
5  
6  
7  
8  
9 10 Hong CS, Siegel AL, Ferris TG. Caring for high-need, high-cost patients: what makes  
10 for a successful care management program? *Commonw Fund* Published Online First:  
11 2014. doi:10.1016/j.trac.2015.07.006  
12  
13  
14  
15  
16 11 Hunt KA, Weber EJ, Showstack JA, *et al.* Characteristics of Frequent Users of  
17 Emergency Departments. *Ann Emerg Med* Published Online First: 2006.  
18 doi:10.1016/j.annemergmed.2005.12.030  
19  
20  
21  
22  
23  
24 12 LaCalle E, Rabin E. Frequent Users of Emergency Departments: The Myths, the Data,  
25 and the Policy Implications. *Ann. Emerg. Med.* 2010.  
26 doi:10.1016/j.annemergmed.2010.01.032  
27  
28  
29  
30  
31  
32 13 Guilcher SJT, Bronskill SE, Guan J, *et al.* Who are the high-cost users? A method for  
33 person-centred attribution of health care spending. *PLoS One* Published Online First:  
34 2016. doi:10.1371/journal.pone.0149179  
35  
36  
37  
38  
39 14 Blumenthal D, Chernof B, Fulmer T, *et al.* Caring for High-Need, High-Cost Patients  
40 — An Urgent Priority. *N Engl J Med* Published Online First: 2016.  
41 doi:10.1056/NEJMp1608511  
42  
43  
44  
45  
46  
47 15 Katon W, Von Korff M, Lin E, *et al.* Distressed high utilizers of medical care. DSM-  
48 III-R diagnoses and treatment needs. *Gen Hosp Psychiatry* Published Online First:  
49 1990. doi:10.1016/0163-8343(90)90002-T  
50  
51  
52  
53  
54 16 Wodchis WP, Austin PC, Henry DA. A 3-year study of high-cost users of health care.  
55 *CMAJ* Published Online First: 2016. doi:10.1503/cmaj.150064  
56  
57  
58  
59 17 Robinson RL, Grabner M, Palli SR, *et al.* Covariates of depression and high utilizers  
60

- 1  
2  
3 of healthcare: Impact on resource use and costs. *J Psychosom Res* Published Online  
4  
5 First: 2016. doi:10.1016/j.jpsychores.2016.04.002  
6  
7
- 8 18 Baker C. Mental health statistics for England: prevalence, services and funding. 2018.  
9  
10 <https://researchbriefings.parliament.uk/ResearchBriefing/Summary/SN06988>  
11  
12
- 13 19 Patel S, Kai J, Atha C, *et al*. Clinical characteristics of persistent frequent attenders in  
14  
15 primary care: Case-control study. *Fam Pract* Published Online First: 2015.  
16  
17 doi:10.1093/fampra/cmz076  
18  
19
- 20 20 Reid S, Crayford T, Patel A, *et al*. Frequent attenders in secondary care: A 3-year  
21  
22 follow-up study of patients with medically unexplained symptoms. *Psychol Med*  
23  
24 Published Online First: 2003. doi:10.1017/S003329170200658X  
25  
26  
27
- 28 21 Von Korff M, Ormel J, Katon W, *et al*. Disability and Depression Among High  
29  
30 Utilizers of Health Care: A Longitudinal Analysis. *Arch Gen Psychiatry* Published  
31  
32 Online First: 1992. doi:10.1001/archpsyc.1992.01820020011002  
33  
34  
35
- 36 22 Arnow BA, Hunkeler EM, Blasey CM, *et al*. Comorbid depression, chronic pain, and  
37  
38 disability in primary care. *Psychosom Med* Published Online First: 2006.  
39  
40 doi:10.1097/01.psy.0000204851.15499.fc  
41  
42  
43
- 44 23 Arnow BA. Relationships between childhood maltreatment, adult health and  
45  
46 psychiatric outcomes, and medical utilization. *J. Clin. Psychiatry*. 2004.  
47  
48 doi:10.4088/JCP.v65n0103  
49  
50
- 51 24 Hensel JM, Taylor VH, Fung K, *et al*. Unique Characteristics of High-Cost Users of  
52  
53 Medical Care With Comorbid Mental Illness or Addiction in a Population-Based  
54  
55 Cohort. *Psychosomatics* Published Online First: 2018.  
56  
57 doi:10.1016/j.psym.2017.10.005  
58  
59  
60



- 1  
2  
3 25 Moher D, Shamseer L, Clarke M, *et al.* Preferred reporting items for systematic review  
4 and meta-analysis protocols (PRISMA-P) 2015 statement. *Rev Esp Nutr Humana y*  
5  
6 *Diet* Published Online First: 2016. doi:10.1186/2046-4053-4-1  
7  
8  
9  
10  
11 26 Hartling L, Milne A, Hamm MP, *et al.* Testing the Newcastle Ottawa Scale showed  
12 low reliability between individual reviewers. *J Clin Epidemiol* Published Online First:  
13 2013. doi:10.1016/j.jclinepi.2013.03.003  
14  
15  
16  
17  
18 27 Higgins JPT, Altman DG, Gøtzsche PC, *et al.* The Cochrane Collaboration's tool for  
19 assessing risk of bias in randomised trials. *BMJ* Published Online First: 2011.  
20 doi:10.1136/bmj.d5928  
21  
22  
23  
24  
25  
26 28 Hayden JA, Côté P, Bombardier C. Evaluation of the quality of prognosis studies in  
27 systematic reviews. *Ann Intern Med* Published Online First: 2006. doi:10.7326/0003-  
28 4819-144-6-200603210-00010  
29  
30  
31  
32  
33  
34  
35  
36  
37  
38  
39  
40  
41  
42  
43  
44  
45  
46  
47  
48  
49  
50  
51  
52  
53  
54  
55  
56  
57  
58  
59  
60

## Abbreviations

PROSPERO: Prospective Registering of Systematic Reviews; CINAHL: Cumulative Index for Nursing and Allied Health Literature; CI: Confidence Interval; GRADE: Grading of recommendation assessment, development and evaluation; OR: Odds Ratio; NHS: National Health Service; GP: General Practitioner; PRISMA: Preferred Reporting Items for Systematic Reviews and Meta-Analysis; NOS: The Newcastle – Ottawa Scale; ICD: International Classification of Diseases; DSM: Diagnostic and Statistical Manual of Mental Disorders.

For peer review only

**Acknowledgments:**

The authors would like to thank Rosalind McNally (Outreach Librarian) in the Research and Innovation Department & Knowledge Service in the Greater Manchester Mental Health NHS Foundation Trust for her advice and review of the search strategy.

For peer review only

**Contributors:**

OL and FJ developed the search strategy. OL drafted the manuscript and registered the protocol. EG and AB were involved in the design of the review and provided continuous feedback on the manuscript. OL will be first reviewer and FJ will be second reviewer. All authors read and approved the manuscript.

For peer review only

1  
2  
3  
4  
5  
6  
7  
8  
9  
10  
11  
12  
13  
14  
15  
16  
17  
18  
19  
20  
21  
22  
23  
24  
25  
26  
27  
28  
29  
30  
31  
32  
33  
34  
35  
36  
37  
38  
39  
40  
41  
42  
43  
44  
45  
46  
47  
48  
49  
50  
51  
52  
53  
54  
55  
56  
57  
58  
59  
60

**Funding:**

This review received no grant from any funding agency in the public, commercial or not-for-profit sectors.

For peer review only

1  
2  
3 **Competing Interest:**  
4

5 The authors declare that they have no competing interests.  
6  
7  
8  
9  
10  
11  
12  
13  
14  
15  
16  
17  
18  
19  
20  
21  
22  
23  
24  
25  
26  
27  
28  
29  
30  
31  
32  
33  
34  
35  
36  
37  
38  
39  
40  
41  
42  
43  
44  
45  
46  
47  
48  
49  
50  
51  
52  
53  
54  
55  
56  
57  
58  
59  
60

For peer review only

1  
2  
3 **Provenance and Peer Review:**  
4

5 Not commissioned; externally peer reviewed.  
6  
7  
8  
9  
10  
11  
12  
13  
14  
15  
16  
17  
18  
19  
20  
21  
22  
23  
24  
25  
26  
27  
28  
29  
30  
31  
32  
33  
34  
35  
36  
37  
38  
39  
40  
41  
42  
43  
44  
45  
46  
47  
48  
49  
50  
51  
52  
53  
54  
55  
56  
57  
58  
59  
60

For peer review only

1  
2  
3 **Data Sharing and Statement:**  
4

5 There are no unpublished data as this is a systematic review  
6  
7  
8  
9  
10  
11  
12  
13  
14  
15  
16  
17  
18  
19  
20  
21  
22  
23  
24  
25  
26  
27  
28  
29  
30  
31  
32  
33  
34  
35  
36  
37  
38  
39  
40  
41  
42  
43  
44  
45  
46  
47  
48  
49  
50  
51  
52  
53  
54  
55  
56  
57  
58  
59  
60

For peer review only



## Appendix 1:

Electronic search strategy in Medline used to conduct a comprehensive literature search.

| Part 1: Setting |                                              |
|-----------------|----------------------------------------------|
| 1               | *health care/                                |
| 2               | (health adj5 care).ti,ab,de.                 |
| 3               | *health service/                             |
| 4               | (health adj5 service\$).ti,ab,de.            |
| 5               | *hospital/                                   |
| 6               | hospital\$.ti,ab,de.                         |
| 7               | *ambulatory care/                            |
| 8               | (ambulatory care adj5 facilit\$).ti,ab,de.   |
| 9               | *outpatient/                                 |
| 10              | outpatient\$.ti,ab,de.                       |
| 11              | *outpatient department/                      |
| 12              | (outpatient adj2 department).ti,ab,de.       |
| 14              | *outpatient department/                      |
| 15              | (outpatient adj2 clinic\$).ti,ab,de.         |
| 16              | primary medical care/                        |
| 17              | (primary adj2 care).ti,ab,de.                |
| 18              | *general practice/                           |
| 19              | (general adj practi\$).ti,ab,de.             |
| 20              | family practice.mp.                          |
| 21              | (family adj practi\$).ti,ab,de.              |
| 22              | gp.mp.                                       |
| 23              | gps.ti,ab,de                                 |
| 24              | family physician.mp.                         |
| 25              | family physic\$.ti,ab,de.                    |
| 26              | *emergency health service/                   |
| 27              | emergency service\$.ti,ab,de.                |
| 28              | (emergency adj2 service\$).ti,ab,de.         |
| 29              | emergency department.mp. or *emergency ward/ |
| 30              | emergency department\$.ti,ab,de.             |
| 31              | (emergency adj5 department\$).ti,ab,de.      |
| 32              | *medical service/                            |
| 33              | (medical adj5 service).ti,ab,de.             |
| 34              | exp delivery of health care/                 |
| 35              | exp health service\$/                        |
| 36              | exp ambulatory care facilities/              |
| 37              | exp ambulatory care information systems/     |
| 38              | exp primary care/                            |
| 39              | exp physicians, family/                      |
| 40              | exp primary health care/                     |

| <b>Part 2: Cost/service utilisation</b> |                                       |
|-----------------------------------------|---------------------------------------|
| 41                                      | high cost.mp.                         |
| 42                                      | high cost\$.ti,ab,de.                 |
| 43                                      | high?cost\$.ti,ab,de.                 |
| 44                                      | (high adj5 cost\$.ti,ab,de.           |
| 45                                      | frequent cost.mp.                     |
| 46                                      | frequent cost\$.ti,ab,de.             |
| 47                                      | (frequent adj5 cost\$.ti,ab,de.       |
| 48                                      | high expenditure.mp.                  |
| 49                                      | high expenditure.ti,ab,de.            |
| 50                                      | (high adj5 expenditure).ti,ab,de.     |
| 51                                      | high expense.mp.                      |
| 52                                      | high expense.ti,ab,de.                |
| 53                                      | (high adj5 expense).ti,ab,de.         |
| 54                                      | frequent user.mp.                     |
| 55                                      | frequent user.ti,ab,de.               |
| 56                                      | (frequent adj5 user).ti,ab,de.        |
| 57                                      | high user.mp.                         |
| 58                                      | high user.ti,ab,de.                   |
| 59                                      | (high adj5 user).ti,ab,de.            |
| 60                                      | high utiliser.mp.                     |
| 61                                      | high utiliser\$.ti,ab,de.             |
| 62                                      | high utilizer.mp.                     |
| 63                                      | high utilizer\$.ti,ab,de.             |
| 64                                      | (high adj5 utiliser\$.ti,ab,de.       |
| 65                                      | (high adj5 utilizer\$.ti,ab,de.       |
| 66                                      | frequent utiliser.mp.                 |
| 67                                      | frequent utilizer.mp.                 |
| 68                                      | frequent utilizer\$.ti,ab,de.         |
| 69                                      | frequent utiliser\$.ti,ab,de.         |
| 70                                      | (frequent adj5 utilizer\$.ti,ab,de.   |
| 71                                      | (frequent adj5 utiliser\$.ti,ab,de.   |
| 72                                      | high utilisation.mp.                  |
| 73                                      | high utilization.mp.                  |
| 74                                      | high utilization.ti,ab,de.            |
| 75                                      | high utilisation.ti,ab,de.            |
| 76                                      | (high adj5 utilization).ti,ab,de.     |
| 77                                      | (high adj5 utilisation).ti,ab,de.     |
| 78                                      | frequent utilisation.mp.              |
| 79                                      | frequent utilization.mp.              |
| 80                                      | frequent utilisation.ti,ab,de.        |
| 81                                      | frequent utilization.ti,ab,de.        |
| 82                                      | (frequent adj5 utilisation).ti,ab,de. |

|                                         |                                        |
|-----------------------------------------|----------------------------------------|
| 83                                      | (frequent adj5 utilization).ti,ab,de.  |
| 84                                      | high need.mp.                          |
| 85                                      | high need.ti,ab,de.                    |
| 86                                      | (high adj5 need).ti,ab,de.             |
| 87                                      | high attend.mp.                        |
| 88                                      | high attend\$.ti,ab,de.                |
| 89                                      | (high adj5 attend\$).ti,ab,de.         |
| 90                                      | superutilizer.mp.                      |
| 91                                      | superutilizer.ti,ab,de.                |
| 92                                      | exp health expenditures/               |
| 93                                      | exp patient acceptance of health care/ |
| 94                                      | exp health care costs/                 |
| 95                                      | exp health services accessibility/     |
| 96                                      | exp cost benefit analysis/             |
| 97                                      | exp practice patterns physicians/      |
| 98                                      | exp efficiency organizational/         |
| 99                                      | exp health services misuse/            |
| 100                                     | exp patient care team/                 |
| 101                                     | exp case management/                   |
| 102                                     | exp office visits/                     |
| 103                                     | exp referral/                          |
| <b>Part 3: Anxiety/Depression terms</b> |                                        |
| 104                                     | exp anxiety/                           |
| 105                                     | (anxiety adj5 disorder\$.tw            |
| 106                                     | exp panic disorder/                    |
| 107                                     | (panic adj5 disorder\$.tw              |
| 108                                     | panic.tw                               |
| 109                                     | (panic adj5 attack\$.tw                |
| 110                                     | fear.tw                                |
| 111                                     | exp depression/                        |
| 112                                     | (depressive adj5 disorder\$.tw         |

## Appendix 2:

### Quality assessment form adapted from the Ottawa-Newcastle scale (NOS) for assessing non-randomised studies

|                                            |                                                                                                                                                                                                                                                                                                                                                                                                                                                                                       | Yes/No/Unclear |
|--------------------------------------------|---------------------------------------------------------------------------------------------------------------------------------------------------------------------------------------------------------------------------------------------------------------------------------------------------------------------------------------------------------------------------------------------------------------------------------------------------------------------------------------|----------------|
| Selection of participants                  | [1] Was the inclusion/exclusion clearly described? (for example, age, diagnosis status, anxiety/depression)<br>[2] Was inclusion/exclusion assessed using valid and reliable measures? (for example, clinical interview to ascertain anxiety/depression or standardised questionnaires)<br>[3] Was recruitment strategy clearly described?<br>[4] Did the investigators ensure that the exposed/unexposed group were comparable (for example did they use stratification or matching) |                |
| Adequate description of study population   | [1] Was study population well characterised?<br>➤ Age<br>➤ Sex<br>➤ Ethnicity<br>➤ Suitable definition of anxiety/depression                                                                                                                                                                                                                                                                                                                                                          |                |
| Validated method for ascertaining exposure | [1] Was the method used to ascertain exposure clearly defined?<br>[2] Was a valid and reliable measure used to ascertain exposure?<br>(For example what measures were used to confirm anxiety/depression)<br>➤ Standardised questionnaires<br>➤ Clinical interview                                                                                                                                                                                                                    |                |
| Validated method to confirm outcome        | [1] Was a valid and reliable measures used to ascertain outcome? For example<br>➤ Mean change in health expenditure<br>➤ Interviews<br>➤ Questionnaires                                                                                                                                                                                                                                                                                                                               |                |
| Adequate follow-up period                  | [1] Was follow-up adequate enough for the outcome to occur?<br>[2] Was follow-up period the same across groups?<br>[3] Were differences in follow-up adjusted for using statistical techniques?                                                                                                                                                                                                                                                                                       |                |
| Completeness of follow-up (attrition)      | [1] Were drop-out rates and reasons for drop-out similar across exposed and unexposed?<br>[2] Were numbers of drop-outs/withdrawals documented at each time point?                                                                                                                                                                                                                                                                                                                    |                |
| Analysis and controls for confounders      | [1] Does the study identify and control for confounders or effect modifiers?                                                                                                                                                                                                                                                                                                                                                                                                          |                |
| Sample size calculation                    | [1] Is the sample size adequate?<br>[2] Did the study describe how the sample size was calculated?<br>[3] Was the sample size large enough to detect differences in events between groups? (i.e. mean change)                                                                                                                                                                                                                                                                         |                |
| Analytical methods appropriate             | [1] Was the type of analysis appropriate for the type of outcome data? For example,<br>➤ Continuous – Mixed model, ANCOVA<br>➤ Categorical - Mixed model for categorical outcome<br>➤ Dichotomous – Logistic regression<br>[2] Was lost to follow-up accounted for in the analysis (e.g. through sensitivity analysis)                                                                                                                                                                |                |

### Appendix 3

#### Data extraction form adapted from Hayden and colleagues Framework

##### Abbreviation

|    |                      |
|----|----------------------|
| GP | General Practitioner |
| OR | Odd ratios           |
| EX | Excluded             |
| NR | Not Reported         |

##### Eligibility criteria for the title and abstract screening phase

| Study design                                                                                                                                                                                                                                                                                                                                    | Assessment                    | Comment |
|-------------------------------------------------------------------------------------------------------------------------------------------------------------------------------------------------------------------------------------------------------------------------------------------------------------------------------------------------|-------------------------------|---------|
| Is it:<br>[1] A cohort study (prospective or retrospective)<br>[2] A case-control or nested case-control<br>[3] A cross-sectional study                                                                                                                                                                                                         | Yes<br>No<br>Unclear          |         |
| <b>Population</b>                                                                                                                                                                                                                                                                                                                               |                               |         |
| [1] Were patients high users of healthcare<br>[2] Accrue high healthcare costs<br>Including: high cost patients, high users, distressed high users, utilisers of care, frequent attenders in primary care, frequent attenders at an emergency department<br><br><b>NB:</b> Please answer YES if anxiety/depression are diagnosed as a sub group | Yes<br>No<br>Unclear          |         |
| Are patients aged (18 years or above)<br><br><b>NB:</b> Please answer Yes if mixed age population                                                                                                                                                                                                                                               | Yes<br>No<br>Unclear          |         |
| <b>Outcomes</b>                                                                                                                                                                                                                                                                                                                                 |                               |         |
| Did the study report any of the following outcomes:<br>[1] Prevalence of anxiety/depression<br>[2] Patients characteristics and context associated with high service usage/costs among patients with anxiety/depression<br>[3] Magnitude of cost or use of healthcare associated with the presence of anxiety/depression                        |                               |         |
| <b>Follow-up</b>                                                                                                                                                                                                                                                                                                                                |                               |         |
| Were the patients followed up and adequate measures taken?<br><br><b>NB:</b> Please answer Yes if adequate measure were taken and key characteristics described                                                                                                                                                                                 | Yes<br>No<br>Unclear          |         |
| <b>Final decision (please tick)</b>                                                                                                                                                                                                                                                                                                             | Include<br>Exclude<br>Unclear |         |

**Exclusion criteria**

| <b>Reasons for exclusion of study from review</b> (please circle where appropriate) |                                                                                                                                                                                |
|-------------------------------------------------------------------------------------|--------------------------------------------------------------------------------------------------------------------------------------------------------------------------------|
| Methods                                                                             | [1] Not a cohort/case-control or cross-sectional study<br>[2] Qualitative study                                                                                                |
| Patients                                                                            | Age: <18<br>Physical illness/psychiatric condition:<br>[1] Paediatric patients<br>[2] Palliative care<br>[3] Obstetrics<br>[4] Patients with established psychiatric condition |
| Intervention                                                                        | [1] Testing of any intervention<br>[2] Screening                                                                                                                               |
| Comparator                                                                          | Studies without non-high cost/non-high users of health care                                                                                                                    |
| Outcomes                                                                            | No relevant outcomes assessed<br>No data for relevant subgroup extractable                                                                                                     |
| Follows-up period                                                                   | No follow-up                                                                                                                                                                   |
| Other                                                                               | Duplicate publication<br>Other                                                                                                                                                 |

**Inclusion criteria**

| <b>Specific inclusion criteria</b> (please include if answer is Yes to all question below) |                      |
|--------------------------------------------------------------------------------------------|----------------------|
| <b>Eligibility criteria</b>                                                                |                      |
| Satisfaction of eligibility criteria                                                       | Yes<br>No<br>Unclear |
| <b>Effect sizes</b>                                                                        |                      |
| Is there sufficient reporting of statistics or data to calculate effect sizes              | Yes<br>No<br>Unclear |

**Organisation**

| <b>Organisational aspect</b> | <b>Exclude</b>                                                                                                         | <b>Include</b> |
|------------------------------|------------------------------------------------------------------------------------------------------------------------|----------------|
| <b>Reviewer/date:</b>        | <b>Checked by:</b>                                                                                                     |                |
| Author/Year                  |                                                                                                                        |                |
| Journal/Source               |                                                                                                                        |                |
| Country of origin            |                                                                                                                        |                |
| Publication type             | Full text/Abstract/Book chapter/progress report/<br>Other – please specify                                             |                |
| Fate                         | Decision: pending/Checked reference/Use for discussion/EX without listing/EX<br>with listing<br>Other – please specify |                |
| Notes                        |                                                                                                                        |                |

**Study characteristics**

| <b>General study characteristics (please circle where appropriate)</b>    |                                                                                                                                                                                                                                                                                                                                                            |
|---------------------------------------------------------------------------|------------------------------------------------------------------------------------------------------------------------------------------------------------------------------------------------------------------------------------------------------------------------------------------------------------------------------------------------------------|
| Location of study                                                         |                                                                                                                                                                                                                                                                                                                                                            |
| Study aims                                                                | Reported/NR                                                                                                                                                                                                                                                                                                                                                |
| Date of recruitment                                                       | From _____ to _____<br>Median (range):#<br>Mean:#                                                                                                                                                                                                                                                                                                          |
| Length of follow-up of outcome of interest + length of follow-up of study | From _____ to _____<br>Median (range):#<br>Mean:#                                                                                                                                                                                                                                                                                                          |
| Outcome assessed                                                          | Did the study report any of the following outcome:<br>[1] Prevalence of anxiety/depression<br>[2] Patients characteristics and context associated with high service usage/costs among patients with anxiety/depression<br>[3] Magnitude of cost or use of healthcare associated with the presence of anxiety/depression<br>Other ( <i>please specify</i> ) |
| Outcome definition                                                        |                                                                                                                                                                                                                                                                                                                                                            |
| Relationship between outcome and relevant factor                          | Is the relationship statistically significant?<br>Yes/No<br>OR/mean difference:#<br><br>If No, is it due to:<br>Low powered or inconclusive study/A true negative study                                                                                                                                                                                    |
| Power calculation                                                         | Yes/No/Not reported<br><br>Calculated sample size:#<br>Sample size achieved: Yes/No                                                                                                                                                                                                                                                                        |
| Funding                                                                   | Unclear<br>NR<br>Please state where reported                                                                                                                                                                                                                                                                                                               |
| Conflict of interest statement                                            | Yes/No/NR                                                                                                                                                                                                                                                                                                                                                  |

| <b>Baseline characteristics of patients (please circle where appropriate)</b> |          |         |                                                                                                                                                  |
|-------------------------------------------------------------------------------|----------|---------|--------------------------------------------------------------------------------------------------------------------------------------------------|
|                                                                               | Exposure | Control | Notes: Any relationship with outcomes?<br>Yes/No/NR<br>If Yes Please state if statistically significant and OR/mean changes in continuous values |
| Overall comment: Significant/Insignificant                                    |          |         |                                                                                                                                                  |
| Number of patients                                                            |          |         |                                                                                                                                                  |
| Age range (if reported)                                                       |          |         |                                                                                                                                                  |
| Mean                                                                          |          |         |                                                                                                                                                  |
| Ethnicity                                                                     |          |         |                                                                                                                                                  |
| No%                                                                           |          |         |                                                                                                                                                  |
| Gender                                                                        | Male:    | Male:   |                                                                                                                                                  |
| No%                                                                           | Female:  | Female: |                                                                                                                                                  |
| No of patients screened for anxiety/depression                                |          |         |                                                                                                                                                  |
| No of patients recruited                                                      |          |         |                                                                                                                                                  |

1  
2  
3  
4  
5  
6  
7  
8  
9  
10  
11  
12  
13  
14  
15  
16  
17  
18  
19  
20  
21  
22  
23  
24  
25  
26  
27  
28  
29  
30  
31  
32  
33  
34  
35  
36  
37  
38  
39  
40  
41  
42  
43  
44  
45  
46  
47  
48  
49  
50  
51  
52  
53  
54  
55  
56  
57  
58  
59  
60

|                                                                                                                                                  |  |  |  |
|--------------------------------------------------------------------------------------------------------------------------------------------------|--|--|--|
| No of patients allocated                                                                                                                         |  |  |  |
| No of patients evaluated                                                                                                                         |  |  |  |
| No of drop-outs                                                                                                                                  |  |  |  |
| Reasons for drop-outs                                                                                                                            |  |  |  |
| Number of protocol violations                                                                                                                    |  |  |  |
| Definition of anxiety/depression<br>[1] Clinical interview<br>[2] Standardised questionnaire<br><br>Please circle all that applies and list all  |  |  |  |
| Status of patient at recruitment<br>Any treatment for any comorbidities<br><br>If treated:<br>Please state<br><br>What treatment<br><br>Duration |  |  |  |
| Adverse event?<br>Yes/No<br><br><i>If Yes please state</i>                                                                                       |  |  |  |

| Observational study characteristics (please circle where appropriate) |                                                                                                                   |
|-----------------------------------------------------------------------|-------------------------------------------------------------------------------------------------------------------|
| Sample size                                                           |                                                                                                                   |
| Number of excluded patients                                           |                                                                                                                   |
| Recruitment method                                                    |                                                                                                                   |
| Type of observational study                                           | Cohort studies (prospective/retrospective)<br>Case-control studies/nested case-control<br>Cross-sectional studies |
| Are groups comparable                                                 | Yes/No<br><br>If No, please specify                                                                               |
| Any confounders?                                                      | Yes/No<br><br>If No, please specify                                                                               |
| Analysis                                                              |                                                                                                                   |
| Drop-outs stated                                                      | Yes/No<br><br>If Yes:# in each group                                                                              |



### Outcome details

*The following table have been copied for every relevant outcome assessed (please fill out fields only where applicable)*

| Outcome assessed (please state where relevant)             |  |
|------------------------------------------------------------|--|
| Definition of each outcome                                 |  |
| Time of assessment of each outcome                         |  |
| Timing of assessment                                       |  |
| Length of follow up for each outcome                       |  |
| Method of measurement                                      |  |
| No of patients evaluated for each outcome, as stated above |  |

| Methodological quality summary for observational studies |                  |        |                       |        |                   |
|----------------------------------------------------------|------------------|--------|-----------------------|--------|-------------------|
| Reviewer/Date:                                           |                  |        | Checked by:           |        |                   |
| Contents (please refer to tables below for guidance)     | Yes              | Partly | No                    | Unsure | Comments          |
| Study participation                                      |                  |        |                       |        |                   |
| Study attrition                                          |                  |        |                       |        |                   |
| Measurement of prognostic factors                        |                  |        |                       |        |                   |
| Measurement and controlling for confounding variables    |                  |        |                       |        |                   |
| Measurement of outcomes                                  |                  |        |                       |        |                   |
| Analysis approach                                        |                  |        |                       |        |                   |
| Summarised validity                                      | Low risk of bias |        | Moderate risk of bias |        | High risk of bias |
| Remarks:                                                 |                  |        |                       |        |                   |

# Reporting checklist for protocol of a systematic review.

Based on the PRISMA-P guidelines.

## Instructions to authors

Complete this checklist by entering the page numbers from your manuscript where readers will find each of the items listed below.

Your article may not currently address all the items on the checklist. Please modify your text to include the missing information. If you are certain that an item does not apply, please write "n/a" and provide a short explanation.

Upload your completed checklist as an extra file when you submit to a journal.

In your methods section, say that you used the PRISMA-P reporting guidelines, and cite them as:

Moher D, Shamseer L, Clarke M, Ghersi D, Liberati A, Petticrew M, Shekelle P, Stewart LA. Preferred Reporting Items for Systematic Review and Meta-Analysis Protocols (PRISMA-P) 2015 statement. *Syst Rev.* 2015;4(1):1.

|                |                     | Reporting Item                                                                                                                                                              | Page Number |
|----------------|---------------------|-----------------------------------------------------------------------------------------------------------------------------------------------------------------------------|-------------|
| Identification | <a href="#">#1a</a> | Identify the report as a protocol of a systematic review                                                                                                                    | 3           |
| Update         | <a href="#">#1b</a> | If the protocol is for an update of a previous systematic review, identify as such                                                                                          | N/A         |
|                | <a href="#">#2</a>  | If registered, provide the name of the registry (such as PROSPERO) and registration number                                                                                  | 3           |
| Contact        | <a href="#">#3a</a> | Provide name, institutional affiliation, e-mail address of all protocol authors; provide physical mailing address of corresponding author                                   | 1           |
| Contribution   | <a href="#">#3b</a> | Describe contributions of protocol authors and identify the guarantor of the review                                                                                         | 18          |
|                | <a href="#">#4</a>  | If the protocol represents an amendment of a previously completed or published protocol, identify as such and list changes; otherwise, state plan for documenting important | N/A         |

|                                         |                      |                                                                                                                                                                                                                               |            |
|-----------------------------------------|----------------------|-------------------------------------------------------------------------------------------------------------------------------------------------------------------------------------------------------------------------------|------------|
|                                         |                      | protocol amendments                                                                                                                                                                                                           |            |
| Sources                                 | <a href="#">#5a</a>  | Indicate sources of financial or other support for the review                                                                                                                                                                 | 19         |
| Sponsor                                 | <a href="#">#5b</a>  | Provide name for the review funder and / or sponsor                                                                                                                                                                           | N/A        |
| Role of sponsor or funder               | <a href="#">#5c</a>  | Describe roles of funder(s), sponsor(s), and / or institution(s), if any, in developing the protocol                                                                                                                          | N/A        |
| Rationale                               | <a href="#">#6</a>   | Describe the rationale for the review in the context of what is already known                                                                                                                                                 | 5          |
| Objectives                              | <a href="#">#7</a>   | Provide an explicit statement of the question(s) the review will address with reference to participants, interventions, comparators, and outcomes (PICO)                                                                      | 5          |
| Eligibility criteria                    | <a href="#">#8</a>   | Specify the study characteristics (such as PICO, study design, setting, time frame) and report characteristics (such as years considered, language, publication status) to be used as criteria for eligibility for the review | 6-7        |
| Information sources                     | <a href="#">#9</a>   | Describe all intended information sources (such as electronic databases, contact with study authors, trial registers or other grey literature sources) with planned dates of coverage                                         | 7          |
| Search strategy                         | <a href="#">#10</a>  | Present draft of search strategy to be used for at least one electronic database, including planned limits, such that it could be repeated                                                                                    | Appendix 1 |
| Study records - data management         | <a href="#">#11a</a> | Describe the mechanism(s) that will be used to manage records and data throughout the review                                                                                                                                  | 7          |
| Study records - selection process       | <a href="#">#11b</a> | State the process that will be used for selecting studies (such as two independent reviewers) through each phase of the review (that is, screening, eligibility and inclusion in meta-analysis)                               | 9          |
| Study records - data collection process | <a href="#">#11c</a> | Describe planned method of extracting data from reports (such as piloting forms, done independently, in duplicate), any processes for obtaining and confirming data from investigators                                        | 9          |
| Data items                              | <a href="#">#12</a>  | List and define all variables for which data will be sought (such as PICO items, funding sources), any pre-planned data assumptions and simplifications                                                                       | 6-7        |

|                                    |                                    |                      |                                                                                                                                                                                                                                                           |   |
|------------------------------------|------------------------------------|----------------------|-----------------------------------------------------------------------------------------------------------------------------------------------------------------------------------------------------------------------------------------------------------|---|
| 1<br>2<br>3<br>4<br>5              | Outcomes and prioritization        | <a href="#">#13</a>  | List and define all outcomes for which data will be sought, including prioritization of main and additional outcomes, with rationale                                                                                                                      | 7 |
| 6<br>7<br>8<br>9<br>10<br>11<br>12 | Risk of bias in individual studies | <a href="#">#14</a>  | Describe anticipated methods for assessing risk of bias of individual studies, including whether this will be done at the outcome or study level, or both; state how this information will be used in data synthesis                                      | 8 |
| 13<br>14<br>15<br>16               | Data synthesis                     | <a href="#">#15a</a> | Describe criteria under which study data will be quantitatively synthesised                                                                                                                                                                               | 9 |
| 17<br>18<br>19<br>20<br>21<br>22   |                                    | <a href="#">#15b</a> | If data are appropriate for quantitative synthesis, describe planned summary measures, methods of handling data and methods of combining data from studies, including any planned exploration of consistency (such as I <sup>2</sup> , Kendall's $\tau$ ) | 9 |
| 23<br>24<br>25<br>26               |                                    | <a href="#">#15c</a> | Describe any proposed additional analyses (such as sensitivity or subgroup analyses, meta-regression)                                                                                                                                                     | 9 |
| 27<br>28<br>29<br>30               |                                    | <a href="#">#15d</a> | If quantitative synthesis is not appropriate, describe the type of summary planned                                                                                                                                                                        | 9 |
| 31<br>32<br>33<br>34<br>35         | Meta-bias(es)                      | <a href="#">#16</a>  | Specify any planned assessment of meta-bias(es) (such as publication bias across studies, selective reporting within studies)                                                                                                                             | 9 |
| 36<br>37<br>38<br>39<br>40<br>41   | Confidence in cumulative evidence  | <a href="#">#17</a>  | Describe how the strength of the body of evidence will be assessed (such as GRADE)                                                                                                                                                                        | 9 |

42 The PRISMA-P checklist is distributed under the terms of the Creative Commons Attribution License  
 43 CC-BY 4.0. This checklist can be completed online using <https://www.goodreports.org/>, a tool made  
 44 by the [EQUATOR Network](#) in collaboration with [Penelope.ai](#)  
 45  
 46  
 47  
 48  
 49  
 50  
 51  
 52  
 53  
 54  
 55  
 56  
 57  
 58  
 59  
 60

# BMJ Open

## The prevalence of common mental health disorders in adults who are high or costly users of health care services: Protocol for a systematic review and meta-analysis

|                                 |                                                                                                                                                                                                                                                                                                                                                                                                                                                                                                                                                                                                            |
|---------------------------------|------------------------------------------------------------------------------------------------------------------------------------------------------------------------------------------------------------------------------------------------------------------------------------------------------------------------------------------------------------------------------------------------------------------------------------------------------------------------------------------------------------------------------------------------------------------------------------------------------------|
| Journal:                        | <i>BMJ Open</i>                                                                                                                                                                                                                                                                                                                                                                                                                                                                                                                                                                                            |
| Manuscript ID                   | bmjopen-2018-028295.R1                                                                                                                                                                                                                                                                                                                                                                                                                                                                                                                                                                                     |
| Article Type:                   | Protocol                                                                                                                                                                                                                                                                                                                                                                                                                                                                                                                                                                                                   |
| Date Submitted by the Author:   | 16-Apr-2019                                                                                                                                                                                                                                                                                                                                                                                                                                                                                                                                                                                                |
| Complete List of Authors:       | Jadhakhan, Ferozkhan; University of Birmingham, Institute of Mental Health, School of Psychology, College of Life and Environmental Sciences; Birmingham and Solihull Mental Health NHS Foundation Trust, Research and Innovation<br>Lindner, Oana; University of Leeds, Division of Psychological and Social Medicine, Leeds Institute of Health Sciences, School of Medicine, Level 10, Worsley Building, Clarendon Way, University of Leeds<br>Blakemore, Amy; University of Manchester,<br>Guthrie, Elspeth; University of Leeds Leeds Institute of Health Sciences, Psychological and Social Medicine |
| <b>Primary Subject Heading</b>: | Mental health                                                                                                                                                                                                                                                                                                                                                                                                                                                                                                                                                                                              |
| Secondary Subject Heading:      | Health economics, Mental health, Emergency medicine, General practice / Family practice                                                                                                                                                                                                                                                                                                                                                                                                                                                                                                                    |
| Keywords:                       | Common Mental Health Disorders, Depression, Anxiety, Health Care Utilisation, High Cost, High Health Care Cost                                                                                                                                                                                                                                                                                                                                                                                                                                                                                             |
|                                 |                                                                                                                                                                                                                                                                                                                                                                                                                                                                                                                                                                                                            |

SCHOLARONE™  
Manuscripts

1  
2  
3 **The prevalence of common mental health disorders in adults who are high or costly users**  
4 **of health care services: Protocol for a systematic review and meta-analysis**  
5  
6

7 Dr Ferozkhan Jadhakhan<sup>1\*</sup>, Dr Oana C Lindner<sup>2\*</sup>, Dr Amy Blakemore<sup>3</sup>, Professor Elspeth A  
8 Guthrie<sup>2</sup>  
9

10  
11  
12 Correspondence author: Dr Ferozkhan Jadhakhan, [f.jadhakhan@bham.ac.uk](mailto:f.jadhakhan@bham.ac.uk)  
13  
14

15 \*Dr Jadhakhan and Dr Lindner are joint first authors of this manuscript.  
16  
17

- 18  
19 1. School of Psychology, College of Life and Environmental Sciences, Edgbaston,  
20 University of Birmingham, B15 2TT, UK  
21  
22 2. Division of Psychological and Social Medicine, Leeds Institute of Health Sciences,  
23 School of Medicine, Level 10, Worsley Building, Clarendon Way, University of Leeds,  
24 Leeds, LS2 9NL, UK.  
25  
26 3. Division of Nursing, Social Work and Midwifery, School of Health Sciences,  
27 Manchester Academic Health Science Centre, The University of Manchester, Jean  
28 McFarlane Building, Oxford Road, Manchester, M13 9PL, UK  
29  
30  
31  
32  
33  
34  
35  
36  
37  
38  
39

40 Email:

41  
42 Dr Oana C Lindner: [O.C.Lindner@leeds.ac.uk](mailto:O.C.Lindner@leeds.ac.uk)  
43

44 Dr Ferozkhan Jadhakhan: [F.Jadhakhan@bham.ac.uk](mailto:F.Jadhakhan@bham.ac.uk)  
45

46 Dr Amy Blakemore: [amy.blakemore@manchester.ac.uk](mailto:amy.blakemore@manchester.ac.uk)  
47

48 Professor Elspeth A Guthrie: [E.A.Guthrie@leeds.ac.uk](mailto:E.A.Guthrie@leeds.ac.uk)  
49  
50  
51  
52  
53  
54  
55  
56

57 **Word count: 3670**  
58  
59  
60

1  
2  
3 **Keywords:** Common Mental Health Disorders, Depression, Anxiety, Health Care Use,  
4  
5 Frequent attenders, High Cost, High Health Care Cost, Prevalence  
6  
7  
8  
9  
10  
11  
12  
13  
14  
15  
16  
17  
18  
19  
20  
21  
22  
23  
24  
25  
26  
27  
28  
29  
30  
31  
32  
33  
34  
35  
36  
37  
38  
39  
40  
41  
42  
43  
44  
45  
46  
47  
48  
49  
50  
51  
52  
53  
54  
55  
56  
57  
58  
59  
60

For peer review only

## ABSTRACT

**Introduction:** In all health care settings, a small proportion of patients account for a large level of health care use and associated high health care costs. Depression and anxiety are common co-morbidities in patients who are high users of care. The aims of this systematic review are to: (1) estimate the prevalence of anxiety/depression in adults who are high users of general physical health care services and/or who accrue high health care costs (2) estimate the magnitude of health care use associated with the presence of anxiety/depression.

**Methods and Analysis:** This review will include any studies where patients are high users of primary, secondary, or emergency health care services and/or accrue high health care costs. We will focus on patients who are over the age of 18 whose degree of anxiety/depression has been evaluated with a standardised questionnaire or by a clinical interview generating a diagnosis according to international diagnostic criteria. The review will include eligible studies indexed in MEDLINE, PsychINFO, EMBASE, CINAHL, PROSPERO, Cochrane Library from inception to 1<sup>st</sup> April 2019. We will estimate the prevalence of anxiety/depression in these populations, and the magnitude of use associated with anxiety/depression. We will provide a narrative description of findings and factors that may influence them. A meta-analysis may be pursued if the degree of heterogeneity across studies is acceptable.

**Ethics and dissemination:** This systematic review will use data from existing studies, hence no ethical approvals are required. Findings will be disseminated in a peer-reviewed publication and at relevant academic meetings.

**PROSPERO Registration number:** CRD42018102628



## STRENGTHS AND LIMITATIONS

1. This systematic review includes both studies of high health care use and/or high health care costs.
2. It includes studies of primary, secondary care, and emergency departments.
3. It focuses upon studies that have specifically recorded the presence of depression and/or anxiety in the high cost/high use population studied.
4. A narrative summary of findings and sources of variation based on a comprehensive data extraction framework will be provided with relevant subgroup analyses based upon: country, type of health care system, location of study (primary, secondary care, emergency department, or total health care), and way of recording depression/anxiety.
5. A meta-analysis may not be feasible given a likely high level of heterogeneity in outcome definitions and measurements.

## INTRODUCTION

The cost of health care in developed countries has continued to grow over recent years and the current projected trajectories of growth are unsustainable [1]. This situation is particularly severe in the United States (US), where the cost of health care is nearly twice that of most other developed countries [1,2]. Across health care systems, a small proportion of patients account for a large proportion of health care use and cost [3]. These findings have consistently emerged from studies of general practice (GP) attendances [4], inpatient length of stay [5,6], outpatient appointments [7], and emergency department (ED) services [8–10]. In primary care, approximately 10% of ‘frequent attenders’ account for up to 39% of all consultations [11]. In the US approximately 5% of patients account for about 50% of all US health care spending [12].

It has been suggested that approximately 50% of high users of health care in primary and secondary care have significant mental health problems, either alone or, in addition to physical health needs, and have been termed ‘distressed high users’ [13]. High use of health care services has been associated with a variety of mental health problems including multiple psychiatric diagnoses [14,15], long histories of psychological ill health [16,17], history of childhood abuse or neglect [18], or addictions [19].

A recent systematic review of the general characteristics of high-cost patients found a high prevalence of multiple chronic conditions amongst the patient population [20]. Mental health problems were also common but varied according to the health care system. In US Medicaid, the prevalence of mental illness ranged from 30-75%, whereas in US Medicare, the prevalence was between 10-25%. There were, however, no details as to the nature of mental health problems experienced by these high-cost patients, as data were grouped under a broad category of mental and behavioral disorders. One of the main findings of the review was a notable difference in characteristics and utilization across payers and countries.

1  
2  
3 Several methods have been studied to try to improve the care of high-cost or high-use  
4 patients in the hope of reducing excessive or unnecessary health care use, but efforts to date  
5  
6 have had mixed results [21,22]. Evidence suggests that effectiveness and efficiency of care  
7  
8 improves when interventions are targeted to those who are most likely to benefit [23,24].  
9  
10 Specific interventions for treating depression and anxiety in people with co-morbid physical  
11  
12 health problems have shown promising results [25,26] but have not been targeted at high-cost  
13  
14 patients with co-morbid depression/anxiety.  
15  
16  
17  
18

19 Improved recognition of the association of depression and anxiety with high health care  
20  
21 use and costs will enable treatments that have already been developed for depression/anxiety  
22  
23 in physical disease, to be evaluated in this high need/high cost group. Although there has been  
24  
25 a general call for better integration of physical and mental health services, the treatment and  
26  
27 management of co-morbid depression/anxiety in chronic physical disease remains poorly  
28  
29 managed [27].  
30  
31  
32

33 Our aim is to estimate the prevalence of anxiety/depression in adults who are high users  
34  
35 of health care or accrue high health care costs and where possible to estimate the magnitude of  
36  
37 use associated with anxiety/depression. Segmentation analysis has been suggested as a method  
38  
39 to identify homogeneous groups of patients with similar characteristics, needs, and behaviors  
40  
41 in order to personalize treatment and policy [28]. We are specifically interested in depression  
42  
43 and anxiety, as opposed to all mental health problems, as interventions have already been  
44  
45 developed to treat depression/anxiety when associated with physical disease. Such  
46  
47 interventions could be used to target a subgroup of high use/cost patients with the potential to  
48  
49 improve their health and reduce health care use. Other forms of mental illness require other  
50  
51 treatment approaches.  
52  
53  
54

## 55 **Aims**

56  
57  
58  
59  
60

1  
2  
3 This systematic review will aim to: (1) estimate the prevalence of anxiety and/or depression in  
4 patients who are high users of health care or accrue high health care costs; (2) determine the  
5 magnitude of health care use associated with the presence of anxiety and/or depression.  
6  
7  
8  
9

## 10 **METHODS AND DESIGN**

### 11 **Population**

12  
13  
14  
15  
16 This review will include studies focusing on adults aged  $\geq 18$  years, who are high users of health  
17 care services or accrue high health care costs, and whose level of depression/anxiety have been  
18 evaluated through standardised questionnaires or clinical interviews. We include studies  
19 conducted in primary, secondary care, and emergency departments (ED) and across all health  
20 care systems. We will not include studies with populations seen in the context of psychiatric  
21 or mental health services for a primary diagnosis of a psychiatric condition (i.e. psychosis,  
22 schizophrenia) as the aim is to estimate the prevalence of anxiety/depression among high users  
23 of general physical health care services. We will not include specific medical  
24 specialties/illnesses associated with more frequent or costly health care use due to the nature  
25 of the condition or type of specialty (e.g. surgery, paediatrics, palliative care, obstetrics,  
26 transplant, neurodegenerative diseases, oral and maxillofacial, dentistry, nephrology,  
27 infectious diseases, virology and HIV/AIDS studies, physiotherapy, and cosmetic surgery).  
28  
29  
30  
31  
32  
33  
34  
35  
36  
37  
38  
39  
40  
41  
42  
43  
44

45 We have focused on general hospital and primary care services, to ensure the review is relevant  
46 to as wide a population as possible. There is great variability in the way costs, health care use,  
47 and depression/anxiety have been recorded in the literature. To add studies on individual  
48 disease conditions or specialities would considerably inflate the variability within the  
49 population of this review.  
50  
51  
52  
53  
54

55  
56  
57 For studies of high-cost patients, we will include studies that have defined high cost patients  
58 as being in the top 1<sup>st</sup>, 5<sup>th</sup>, 10<sup>th</sup> and 20<sup>th</sup> percentiles of the patient population [20]. For studies  
59  
60

1  
2  
3 involving high use of health care, we will include studies that have either used similar  
4 percentiles to describe high use (i.e. 1<sup>st</sup>, 5<sup>th</sup>, 10<sup>th</sup> or 20<sup>th</sup>) or have used a recognised definition  
5 of high or frequent use. For ED, we will use the definition of 4 or more attendances per annum  
6 [29]. For primary care, we will use the definition of 10 or more attendances per year [30] or  
7 the top 10% of consulters [31].  
8  
9

10  
11  
12 The review includes studies of costs and health care use. However, resource use and costs are  
13 sensitive to variability both within and between countries, due to aspects such as local prices  
14 or aspects of service organization and delivery. This limits the generalizability and  
15 transferability of estimates of cost and health care across settings. We will not attempt to  
16 combine costs or health use in the analyses across studies. The prevalence of depression or  
17 anxiety will be compared across studies. To determine the magnitude of health care use  
18 associated with depression/anxiety in high-use/high-cost patients, we will calculate the odds  
19 ratios for health care used by depressed and non-depressed individuals.  
20  
21  
22  
23  
24  
25  
26  
27  
28  
29  
30  
31  
32

### 33 **Interventions**

34  
35 We will not include randomised controlled trials, due to their selective nature. We will include  
36 cohort studies of naturalistic changes in health service delivery e.g. implementation of a new  
37 integrated care pathway across a geographical region, where external validity is likely to be  
38 high.  
39  
40  
41  
42  
43  
44  
45

### 46 **Comparators**

47  
48 We will include studies where anxiety/depression is described in groups of patients considered  
49 'high/frequent users' and/or 'high cost users' versus non-high cost and non-high users of  
50 healthcare services. We will include studies where high health care use/costs are compared  
51 between patients with anxiety/depression versus study patients without anxiety/depression.  
52  
53  
54  
55  
56  
57  
58

### 59 **Outcomes**

1  
2  
3 The primary outcome is the prevalence of anxiety/depression in high/frequent and/or costly  
4 users of general health care services. The secondary outcome is the magnitude of health care  
5 use and costs associated with anxiety/depression. Studies including a diverse range of  
6 standardised assessments and metrics for anxiety/depression will be eligible. We will extract  
7 and report the prevalence of anxiety/depression based upon the type of assessments used. For  
8 standardised, validated, self-report measures, this will be in the form of caseness. For clinical  
9 interviews, this will be in the form of a clinical diagnosis.  
10  
11  
12  
13  
14  
15  
16  
17  
18  
19

### 20 **Study designs**

21  
22 We will include retrospective and prospective cohort studies, case-control, nested case-control,  
23 and cross-sectional studies. We will exclude case studies, randomised controlled trials, and  
24 qualitative studies.  
25  
26  
27  
28  
29

### 30 **Search Strategy**

31  
32 We will screen the five databases that are most likely to include studies focusing on our  
33 outcomes of interest: MEDLINE, PsychINFO, EMBASE, CINAHL, PROSPERO, Cochrane  
34 Library, from inception to 1<sup>st</sup> April 2019. We will hand-search reference lists of relevant  
35 reviews/meta-analyses. For each database our search strategy has three parts (see search terms  
36 for Medline in Appendix 1). Search terms within the first part will identify studies pertaining  
37 to general health care settings of interest. The second part will focus on terms related to high  
38 cost or high/frequent use of health care services. The final part will focus the search on studies  
39 evaluating anxiety/depression. This strategy ensures we identify all studies (1) conducted  
40 across general health care settings such as primary, secondary care, and emergency  
41 departments; (2) which include measurements of health care use and/or costs; (3) and assess  
42 anxiety/depression. We will not be able to include studies that do not quantify either health  
43 care use OR costs and studies that do not quantify anxiety/depression. This strategy ensures we  
44  
45  
46  
47  
48  
49  
50  
51  
52  
53  
54  
55  
56  
57  
58  
59  
60

1  
2  
3 include cohort studies describing the characteristics of high use and/or cost patients and case-  
4 control studies where (1) anxiety/depression is compared between high and low use and/or  
5 costs, as defined by the respective study or where (2) health care use/costs is compared between  
6 patients with high and low levels of anxiety/depression, as defined by the study.  
7  
8  
9  
10  
11  
12

13 The strategy was developed in collaboration with experts in these fields and experienced  
14 librarians at the Universities of Birmingham and Manchester, to ensure it yields appropriate  
15 studies. We will include studies in all languages; translations will be pursued either by co-  
16 authors or by international colleagues/students in the Universities of Birmingham, Leeds, and  
17 Manchester. The search will be restricted to studies with adults over the age of 18.  
18  
19  
20  
21  
22  
23  
24

### 25 **Eligibility screening**

26  
27  
28 Eligible studies identified in all the databases will be organised using the EndNote reference  
29 management software. Duplicates will be identified and removed before screening titles and  
30 abstracts.  
31  
32  
33  
34  
35

### 36 **Study selection**

37  
38  
39 Titles and abstracts will be screened independently by two reviewers. Remaining full-text  
40 articles will be further screened and evaluated for their eligibility using the adapted Hayden et  
41 al. framework [32] (Appendix 2). Any disagreement over eligibility will be resolved through  
42 discussions with a third reviewer. The inclusion criteria checklist (Table 1 and Appendix 2)  
43 ensures consistency in the review process and adherence to the Preferred Reporting Items for  
44 Systematic Reviews and Meta-Analyses (PRISMA) guidelines [33]; we will provide a  
45 PRISMA flow-chart depicting the study selection and inclusion/exclusion process.  
46  
47  
48  
49  
50  
51  
52  
53  
54  
55  
56  
57  
58  
59  
60

**Table 1: Inclusion criteria checklist based on the PRISMA guidelines**

|               |                                                                                            |
|---------------|--------------------------------------------------------------------------------------------|
| Study designs | Cohort studies (Retrospective and Prospective)                                             |
|               | Case-control and nested case-control studies                                               |
|               | Cross-sectional studies                                                                    |
| Participants  | Adult aged $\geq 18$ years                                                                 |
|               | High user of health care                                                                   |
|               | Accrue high health care costs                                                              |
|               | Assessment of anxiety/depression                                                           |
| Comparators   | Non-high cost and non-high users of health care                                            |
|               | Frequent/high cost users without depression/anxiety                                        |
| Outcomes      | Prevalence of anxiety/depression in high users of health care and/or high cost patients    |
|               | Magnitude of cost or use of health care associated with the presence of anxiety/depression |

### Quality assessment

The quality of the included studies will first be ensured through the robustness of our database search and the careful title, abstract, and full-text screening of relevant studies, carried out independently by two reviewers using the forms in Appendix 2. We will only include studies reporting on high OR costly users of health care where anxiety/depression is also assessed. All full-text studies meeting the eligibility criteria will undergo a quality assessment carried out independently by two reviewers through an adapted Newcastle-Ottawa Scale [34] (NOS, Appendix 3). Assessment of study quality will include sampling method, sample size, adequacy of description of study population, attrition, method of outcome evaluation (e.g. methods for recording costs/use; type of anxiety/depression measurements, whether they are validated for



1  
2  
3 the setting, etc.), analytical method, and consideration of confounders/covariates. The adapted  
4  
5 NOS quality assessment form will first be piloted on known papers to ascertain its feasibility.  
6  
7  
8 Opinion differences will be resolved by consensus or by involving a third reviewer. Risk of  
9  
10 bias will be evaluated commensurate with the recommendations of the Cochrane Collaboration  
11  
12 [35]. It will be reported in a categorical format, with 'yes' indicating high risk 'no' low risk or  
13  
14 'unclear' for each pre-defined domain. We will describe the study quality and risk of bias for  
15  
16 each study included in our review. For both low- and high-quality studies we will provide a  
17  
18 narrative description of definitions and measurements of costs and health care use, and  
19  
20 prevalence of anxiety /depression used across health care settings, regions, and patient  
21  
22 populations. If a meta-analysis can be pursued, we will run a sensitivity analysis to explore if  
23  
24 outcomes change when removing low quality studies. Through sensitivity analyses we will also  
25  
26 specifically explore the effects of excluding studies which have used non-validated measures  
27  
28 of depression/anxiety in medically ill populations.  
29  
30  
31

### 32 33 **Data extraction**

34  
35  
36 Following the selection of relevant full-text articles and quality assessment, two reviewers will  
37  
38 independently extract relevant information in a data extraction form designed based on Hayden  
39  
40 et al.'s framework [32] (Appendix 2); it will be developed iteratively and first piloted on five  
41  
42 known papers, by two reviewers, before performing the data extraction for all studies.  
43  
44  
45

46  
47 The data extraction form focuses on the study design, population, comparator, and outcome. It  
48  
49 will include: year and country of study, type of health care system, criteria used to define high  
50  
51 use or high costs, method used to record depression/anxiety (self-report measure validated or  
52  
53 non-validated, clinical interview), prevalence of depression and anxiety, health care use, and  
54  
55 costs and associated ranges, the methods used to evaluate these, health care settings (e.g.  
56  
57 primary, secondary or ED or total health care), the odds ratios of use of health care by  
58  
59  
60

1  
2  
3 depressed/anxious patients compared with non-depressed/anxious patients, patient  
4 characteristics (e.g. co-morbidities, whether anxiety/depression is managed).  
5  
6  
7

## 8 **DATA ANALYSIS AND SYNTHESIS**

9

10  
11 The primary outcome is the prevalence of anxiety and/or depression in patients who are high  
12 and/or costly users of health care services. Prevalence rates with any dispersion metrics will be  
13 extracted or calculated from the data available. If enough studies are available for quantitative  
14 summaries we will offer weighted estimates of prevalence within relevant subgroups related to  
15 populations, comparators, study designs, measurement types, and geographical regions. Pooled  
16 prevalence estimates with 95% confidence intervals will be calculated using SPSS version 25  
17 (IBM Corp, Armonk, NY, USA).  
18  
19  
20  
21  
22  
23  
24  
25  
26  
27

28 The secondary outcome is the magnitude of health care use associated with the presence of  
29 anxiety/depression. We are not attempting to pool or calculate costs or health use across  
30 studies. We will only be able to determine the magnitude of health care use associated with  
31 depression/anxiety in relation to studies that have specifically calculated or estimated these.  
32 This will be studies where high health care use/costs are compared between patients with  
33 anxiety/depression versus patients without anxiety/depression. Odds ratios and 95%  
34 confidence intervals will be extracted from studies presenting the number of health care  
35 contacts (e.g. ED attendances or GP contacts or number of hospital admissions) by subjects  
36 with and without depression.  
37  
38  
39  
40  
41  
42  
43  
44  
45  
46  
47

48  
49 We expect both the prevalence of depression/anxiety to be available from studies evaluating  
50 high use/cost populations alone, or in studies comparing high use/cost patients to general  
51 patient populations or populations with low use/cost. Data analysis will result in quantitative  
52 and narrative summaries, as appropriate.  
53  
54  
55  
56  
57  
58  
59  
60

1  
2  
3 For both outcomes, subgroups will be explored based on potential differences related to: 1)  
4 country, 2) type of healthcare system, 3) medical settings (e.g. primary care, ED, inpatients,  
5 outpatients, etc.), 4) metrics used to evaluate health use/costs (e.g. attendances, hospital  
6 admissions, etc.).  
7  
8  
9  
10  
11

12  
13 We will use random-effects models to describe the prevalence of depression/anxiety high use  
14 or high cost populations. This is because it is implausible that the underlying study-specific  
15 prevalence of depression (i.e. the prevalence that would be observed were a study of infinite  
16 size) is the same for each study. Prevalence is likely to vary from study to study according to  
17 factors, both measured and unmeasured, that differ between them [36].  
18  
19  
20  
21  
22  
23

24  
25 We will use the inverse variance method of DerSimonian and Laird to estimate between-study  
26 heterogeneity in underlying depression prevalence and the I-squared measure which represents  
27 the proportion of total variance attributable to this heterogeneity [37,38]. The I-squared  
28 measure gives the percentage of variability in the effect estimate that is due to heterogeneity  
29 rather than to chance. Suggested thresholds for the interpretations of the I-squared measure are  
30 as follows: less than 40% indicates there is no problem with heterogeneity, 30% to 60%  
31 indicates moderate problems, 60% to 90% a substantial problem, and 75% and over a  
32 considerable problem [38]. We will use the threshold of less than 40%.  
33  
34  
35  
36  
37  
38  
39  
40  
41  
42  
43

44 Egger's statistics with 95% confidence intervals and associated funnel plot will depict potential  
45 publication or small bias related to our main outcome summaries and/or within subgroups [39].  
46  
47  
48  
49  
50  
51  
52  
53  
54  
55  
56  
57  
58  
59  
60  
Egger's test is based on the Galbraith plot which is a plot of difference over standard error  
against one over standard error. Egger suggests that a regression of study difference over  
standard error on 1/standard error be undertaken to test the null hypothesis that the intercept is  
equal to zero. If Egger's test is significant ( $p < .05$ ), it means that the funnel plot is asymmetric  
and that smaller studies with smaller precision show larger effects sizes, suggesting bias.

1  
2  
3 Sensitivity analyses will be pursued at minimum on high/low quality studies and on the use of  
4 un-validated standardised questionnaires, and use of structured clinical interviews. If enough  
5 studies are available, other factors that could influence our observed findings will be explored  
6 (e.g. sample size). Tabular and narrative descriptions will be offered for the studies which  
7 cannot be pooled into quantitative summaries due to differing metrics.  
8  
9  
10  
11  
12  
13  
14  
15  
16

## 17 **PATIENT AND PUBLIC INVOLVEMENT STATEMENT**

18  
19 Patients and the public were not invited to contribute to the writing or editing of this systematic  
20 review protocol. The research question was informed by the lack of prior systematic reviews  
21 or meta-analyses exploring the outcomes of interest: prevalence of anxiety/depression in  
22 high/costly health care users and the magnitude of health care use associated with  
23 anxiety/depression across adult populations in any general medical settings.  
24  
25  
26  
27  
28  
29  
30  
31

## 32 **DISCUSSION**

33  
34 The purpose of this systematic review is to estimate the prevalence of anxiety/depression in  
35 people who are frequent, high cost users of general health care services, and then, if possible,  
36 to estimate the level of health care use associated with the presence of anxiety/depression.  
37 While evidence is available suggesting that a small percentage of the population accrues high  
38 percentage of healthcare/costs, it is unclear to date to what extent the costs and use may be due  
39 to the presence of common mental health problems (depression/anxiety). By examining the  
40 information available to date we aim to describe the prevalence of anxiety/depression in people  
41 who are high/costly health care users, and where possible the magnitude of use and costs  
42 associated with these two common mental health problems.  
43  
44  
45  
46  
47  
48  
49  
50  
51  
52  
53  
54  
55

56 Our review will build upon the recent systematic review by Wammes and colleagues [20] that  
57 described the characteristics of high-cost patients and found that a high prevalence of high cost  
58  
59  
60

1  
2  
3 patients had associated mental health disorders. This review will specifically focus upon  
4 depression/anxiety and include both studies of cost and health care use. It will also provide  
5 information about the prevalence of depression/anxiety in different health care settings,  
6 including primary care and ED. There is trade-off between diagnostic accuracy versus size of  
7 study. Our results will complement those of Wammes and colleagues [20], and increase our  
8 understanding of the role of depression/anxiety in driving health care use and costs.  
9  
10  
11  
12  
13  
14  
15  
16

17 Strengths of this review are that it focuses upon common mental health problems, includes all  
18 studies without a time limit, includes both studies of health care cost and health care use, and  
19 includes general health care settings, including primary and secondary care. Additional  
20 strengths are the inclusion of studies published in any language and the independent study  
21 identification, selection, and data extraction pursued by two independent reviewers.  
22  
23  
24  
25  
26  
27  
28  
29

### 30 **IMPLICATIONS OF RESULTS**

31  
32 The results of this systematic review will provide an estimate of the prevalence of common  
33 mental health disorders in high users of health care services, while also providing an estimate  
34 of the magnitude of use associated with depression/anxiety. It will enable treatments, such as  
35 the collaborative care model, that have already been developed for the treatment of  
36 depression/anxiety in the physically ill, to be evaluated in high-cost patients with co-morbid  
37 depression/anxiety resulting in a more personalised approach to both treatment and policy.  
38  
39  
40  
41  
42  
43  
44  
45  
46  
47  
48  
49  
50  
51  
52  
53  
54  
55  
56  
57  
58  
59  
60

## ACKNOWLEDGMENTS

The authors would like to thank Rosalind McNally (Outreach Librarian in the Research and Innovation Department & Knowledge Service in the Greater Manchester Mental Health NHS Foundation Trust) and Anita Phul (Librarian at the Barberry, National Centre for Mental Health, Birmingham and Solihull Mental Health NHS Foundation Trust, Birmingham) for their critical review of the search strategy.

For peer review only

1  
2  
3 **REFERENCES**  
4  
5

- 6 1 Porter ME. What is value in health care? *N Engl J Med* Published Online First: 2010.  
7 doi:10.1056/NEJMp1011024  
8  
9
- 10  
11 2 Davis K. 2012 Annual Report President's Message—Health Care Reform: A Journey.  
12 2012. [https://www.commonwealthfund.org/publications/other-](https://www.commonwealthfund.org/publications/other-publication/2012/dec/2012-annual-report-presidents-message-health-care-reform?redirect_source=/Publications/Annual-Report-Essays/2012/Dec/Health-Care-Reform-A-Journey.aspx)  
13  
14  
15  
16  
17  
18  
19  
20  
21  
22  
23  
24  
25  
26  
27  
28  
29  
30  
31  
32  
33  
34  
35  
36  
37  
38  
39  
40  
41  
42  
43  
44  
45  
46  
47  
48  
49  
50  
51  
52  
53  
54  
55  
56  
57  
58  
59  
60
- 3 Rosella LC, Fitzpatrick T, Wodchis WP, *et al.* High-cost health care users in Ontario,  
Canada: Demographic, socio-economic, and health status characteristics. *BMC Health  
Serv Res* Published Online First: 2014. doi:10.1186/s12913-014-0532-2
- 4 Hochman M, Asch SM. Disruptive Models in Primary Care: Caring for High-Needs,  
High-Cost Populations. *J Gen Intern Med* Published Online First: 2017.  
doi:10.1007/s11606-016-3945-2
- 5 Zook CJ, Moore FD. High-Cost Users of Medical Care. *N Engl J Med* Published Online  
First: 1980. doi:10.1056/NEJM198005013021804
- 6 Calver J, Bramweld KJ, Preen DB, *et al.* High-cost users of hospital beds in Western  
Australia: A population-based record linkage study. *Med J Aust* 2006.
- 7 Kimerling R, Ouimette PC, Cronkite RC, *et al.* Depression and outpatient medical  
utilization: A naturalistic 10-year follow-up. *Ann Behav Med* Published Online First:  
1999. doi:10.1007/BF02895964
- 8 Ruger JP, Richter CJ, Spitznagel EL, *et al.* Analysis of costs, length of stay, and  
utilization of emergency department services by frequent users: Implications for health

- 1  
2  
3 policy. *Acad Emerg Med* Published Online First: 2004. doi:10.1197/j.aem.2004.07.008  
4  
5  
6 9 Hunt KA, Weber EJ, Showstack JA, *et al.* Characteristics of Frequent Users of  
7  
8 Emergency Departments. *Ann Emerg Med* Published Online First: 2006.  
9  
10 doi:10.1016/j.annemergmed.2005.12.030  
11  
12  
13 10 LaCalle E, Rabin E. Frequent Users of Emergency Departments: The Myths, the Data,  
14  
15 and the Policy Implications. *Ann. Emerg. Med.* 2010.  
16  
17 doi:10.1016/j.annemergmed.2010.01.032  
18  
19  
20  
21 11 Smits FT, Brouwer HJ, Zwinderman AH, *et al.* Morbidity and doctor characteristics  
22  
23 only partly explain the substantial healthcare expenditures of frequent attenders: A  
24  
25 record linkage study between patient data and reimbursements data. *BMC Fam Pract*  
26  
27 Published Online First: 2013. doi:10.1186/1471-2296-14-138  
28  
29  
30  
31 12 Schoenman JA, Chockley N. Understanding U.S. health care spending. Washington  
32  
33 (DC): 2011. [http://www.nihcm.org/](http://www.nihcm.org/images/stories/NIHCM-CostBriefEmail.pdf)  
34  
35 [images/stories/NIHCM-CostBriefEmail.pdf](http://www.nihcm.org/images/stories/NIHCM-CostBriefEmail.pdf)  
36  
37 13 Katon W, Von Korff M, Lin E, *et al.* Distressed high utilizers of medical care. DSM-III-  
38  
39 R diagnoses and treatment needs. *Gen Hosp Psychiatry* Published Online First: 1990.  
40  
41 doi:10.1016/0163-8343(90)90002-T  
42  
43  
44 14 Patel S, Kai J, Atha C, *et al.* Clinical characteristics of persistent frequent attenders in  
45  
46 primary care: Case-control study. *Fam Pract* Published Online First: 2015.  
47  
48 doi:10.1093/fampra/cmz076  
49  
50  
51 15 Reid S, Crayford T, Patel A, *et al.* Frequent attenders in secondary care: A 3-year follow-  
52  
53 up study of patients with medically unexplained symptoms. *Psychol Med* Published  
54  
55 Online First: 2003. doi:10.1017/S003329170200658X  
56  
57  
58  
59 16 Von Korff M, Ormel J, Katon W, *et al.* Disability and Depression Among High Utilizers  
60



- 1  
2  
3 of Health Care: A Longitudinal Analysis. *Arch Gen Psychiatry* Published Online First:  
4  
5 1992. doi:10.1001/archpsyc.1992.01820020011002  
6  
7
- 8 17 Arnow BA, Hunkeler EM, Blasey CM, *et al.* Comorbid depression, chronic pain, and  
9 disability in primary care. *Psychosom Med* Published Online First: 2006.  
10 doi:10.1097/01.psy.0000204851.15499.fc  
11  
12
- 13 18 Arnow BA. Relationships between childhood maltreatment, adult health and psychiatric  
14 outcomes, and medical utilization. *J. Clin. Psychiatry*. 2004. doi:10.4088/JCP.v65n0103  
15  
16
- 17 19 Hensel JM, Taylor VH, Fung K, *et al.* Unique Characteristics of High-Cost Users of  
18 Medical Care With Comorbid Mental Illness or Addiction in a Population-Based Cohort.  
19 *Psychosomatics* Published Online First: 2018. doi:10.1016/j.psych.2017.10.005  
20  
21
- 22 20 Wammes JJG, van der Wees PJ, Tanke MAC, *et al.* Systematic review of high-cost  
23 patients' characteristics and healthcare utilisation. *BMJ Open* 2018;**8**:e023113.  
24 doi:10.1136/bmjopen-2018-023113  
25  
26
- 27 21 Blumenthal D, Anderson G, Burke S, Fulmer T, Jha AK, Long P. Tailoring Complex-  
28 Care Management, Coordination, and Integration for High-Need, High-Cost Patients.  
29 *Vital Dir Heal Heal Care Ser* Published Online First: 2016.https://nam.edu/wp-  
30 content/uploads/2016/09/Tailoring-Complex-Care-Management-Coordination-and-  
31 Integration-for-High-Need-High-Cost-Patients.pdf  
32  
33
- 34 22 Hong CS, Siegel AL, Ferris TG. Caring for high-need, high-cost patients: what makes  
35 for a successful care management program? *Commonw Fund* Published Online First:  
36 2014. doi:10.1016/j.trac.2015.07.006  
37  
38
- 39 23 Brown RS, Peikes D, Peterson G, *et al.* Six features of medicare coordinated care  
40 demonstration programs that cut hospital admissions of high-risk patients. *Health Aff*  
41  
42  
43  
44  
45  
46  
47  
48  
49  
50  
51  
52  
53  
54  
55  
56  
57  
58  
59  
60

- 1  
2  
3  
4  
5  
6  
7  
8  
9  
10  
11  
12  
13  
14  
15  
16  
17  
18  
19  
20  
21  
22  
23  
24  
25  
26  
27  
28  
29  
30  
31  
32  
33  
34  
35  
36  
37  
38  
39  
40  
41  
42  
43  
44  
45  
46  
47  
48  
49  
50  
51  
52  
53  
54  
55  
56  
57  
58  
59  
60
- Published Online First: 2012. doi:10.1377/hlthaff.2012.0393
- 24 Anderson GF, Ballreich J, Bleich S, *et al.* Attributes common to programs that successfully treat high-need, high-cost individuals. *Am J Manag Care* 2015.
- 25 Camacho EM, Ntais D, Coventry P, *et al.* Long-term cost-effectiveness of collaborative care (vs usual care) for people with depression and comorbid diabetes or cardiovascular disease: A Markov model informed by the COINCIDE randomised controlled trial. *BMJ Open* Published Online First: 2016. doi:10.1136/bmjopen-2016-012514
- 26 Coventry PA, Hudson JL, Kontopantelis E, *et al.* Characteristics of effective collaborative care for treatment of depression: A systematic review and meta-regression of 74 randomised controlled trials. *PLoS One* Published Online First: 2014. doi:10.1371/journal.pone.0108114
- 27 Department of Health and Social Care. No Health Without Mental Health. 2011. [https://assets.publishing.service.gov.uk/government/uploads/system/uploads/attachment\\_data/file/138253/dh\\_124058.pdf](https://assets.publishing.service.gov.uk/government/uploads/system/uploads/attachment_data/file/138253/dh_124058.pdf)
- 28 Vuik SI, Mayer EK, Darzi A. Patient segmentation analysis offers significant benefits for integrated care and support. *Health Aff* Published Online First: 2016. doi:10.1377/hlthaff.2015.1311
- 29 Locker TE, Baston S, Mason SM, *et al.* Defining frequent use of an urban emergency department. *Emerg Med J* Published Online First: 2007. doi:10.1136/emj.2006.043844
- 30 Vedsted P, Christensen MB. Frequent attenders in general practice care: A literature review with special reference to methodological considerations. *Public Health* Published Online First: 2005. doi:10.1016/j.puhe.2004.03.007
- 31 Luciano J V., Fernández A, Pinto-Meza A, *et al.* Frequent attendance in primary care:

- 1  
2  
3 Comparison and implications of different definitions. *Br J Gen Pract* Published Online  
4  
5 First: 2010. doi:10.3399/bjgp10X483139  
6  
7
- 8 32 Hayden JA, Côté P, Bombardier C. Evaluation of the quality of prognosis studies in  
9  
10 systematic reviews. *Ann Intern Med* Published Online First: 2006. doi:10.7326/0003-  
11  
12 4819-144-6-200603210-00010  
13  
14
- 15 33 Moher D, Shamseer L, Clarke M, *et al.* Preferred reporting items for systematic review  
16  
17 and meta-analysis protocols (PRISMA-P) 2015 statement. *Rev Esp Nutr Humana y Diet*  
18  
19 Published Online First: 2016. doi:10.1186/2046-4053-4-1  
20  
21  
22
- 23 34 Hartling L, Milne A, Hamm MP, *et al.* Testing the Newcastle Ottawa Scale showed low  
24  
25 reliability between individual reviewers. *J Clin Epidemiol* Published Online First: 2013.  
26  
27 doi:10.1016/j.jclinepi.2013.03.003  
28  
29
- 30 35 Higgins JPT, Altman DG, Gøtzsche PC, *et al.* The Cochrane Collaboration's tool for  
31  
32 assessing risk of bias in randomised trials. *BMJ* Published Online First: 2011.  
33  
34 doi:10.1136/bmj.d5928  
35  
36
- 37 36 Stroup DF, Berlin JA, Morton SC, *et al.* Meta-analysis of observational studies in  
38  
39 epidemiology: A proposal for reporting. *J Am Med Assoc* Published Online First: 2000.  
40  
41 doi:10.1001/jama.283.15.2008  
42  
43  
44
- 45 37 DerSimonian R, Laird N. Meta-analysis in clinical trials. *Control Clin Trials* Published  
46  
47 Online First: 1986. doi:10.1016/0197-2456(86)90046-2  
48  
49
- 50 38 Higgins JP, Green S. Cochrane Handbook for Systematic Reviews of Interventions  
51  
52 Version 5.1.0 [updated March 2011]. *Cochrane Collab* Published Online First: 2011.  
53  
54 doi:10.1002/9780470712184.ch4  
55  
56  
57
- 58 39 Egger M, Davey Smith G, Schneider M, *et al.* Bias in meta-analysis detected by a  
59  
60

1  
2  
3  
4  
5  
6  
7  
8  
9  
10  
11  
12  
13  
14  
15  
16  
17  
18  
19  
20  
21  
22  
23  
24  
25  
26  
27  
28  
29  
30  
31  
32  
33  
34  
35  
36  
37  
38  
39  
40  
41  
42  
43  
44  
45  
46  
47  
48  
49  
50  
51  
52  
53  
54  
55  
56  
57  
58  
59  
60

simple, graphical test. *Br Med J* Published Online First: 1997.

doi:10.1136/bmj.315.7109.629

For peer review only

## **CONTRIBUTORS**

OL and FJ developed the search strategy. OL drafted the manuscript and registered the protocol. EG and AB were involved in the design of the review and provided continuous feedback on the manuscript. OL will be first reviewer and FJ will be second reviewer. All authors read and approved the manuscript.

## **COMPETING INTEREST**

The authors declare that they have no competing interests.

## **FUNDING**

This review received no grant from any funding agency in the public, commercial or not-for-profit sectors.

## **DATA SHARING AND STATEMENT**

There are no unpublished data as this is a systematic review.

## **PATIENT CONSENT**

Patient consent is not applicable as this is a protocol for a systematic review/meta-analysis.

## **ETHICS AND DISSEMINATION**

As this systematic review will use data from existing studies no ethical approvals are warranted; the results will be published in a peer-reviewed publication and presented at relevant academic meetings.

1  
2  
3  
4  
5  
6  
7  
8  
9  
10  
11  
12  
13  
14  
15  
16  
17  
18  
19  
20  
21  
22  
23  
24  
25  
26  
27  
28  
29  
30  
31  
32  
33  
34  
35  
36  
37  
38  
39  
40  
41  
42  
43  
44  
45  
46  
47  
48  
49  
50  
51  
52  
53  
54  
55  
56  
57  
58  
59  
60

## Appendix 1:

Electronic search strategy in Medline used to conduct a comprehensive literature search.

| Part 1: Setting |                                              |
|-----------------|----------------------------------------------|
| 1               | *health care/                                |
| 2               | (health adj5 care).ti,ab,de.                 |
| 3               | *health service/                             |
| 4               | (health adj5 service\$).ti,ab,de.            |
| 5               | *hospital/                                   |
| 6               | hospital\$.ti,ab,de.                         |
| 7               | *ambulatory care/                            |
| 8               | (ambulatory care adj5 facilit\$).ti,ab,de.   |
| 9               | *outpatient/                                 |
| 10              | outpatient\$.ti,ab,de.                       |
| 11              | *outpatient department/                      |
| 12              | (outpatient adj2 department).ti,ab,de.       |
| 14              | *outpatient department/                      |
| 15              | (outpatient adj2 clinic\$).ti,ab,de.         |
| 16              | primary medical care/                        |
| 17              | (primary adj2 care).ti,ab,de.                |
| 18              | *general practice/                           |
| 19              | (general adj practi\$).ti,ab,de.             |
| 20              | family practice.mp.                          |
| 21              | (family adj practi\$).ti,ab,de.              |
| 22              | gp.mp.                                       |
| 23              | gps.ti,ab,de                                 |
| 24              | family physician.mp.                         |
| 25              | family physic\$.ti,ab,de.                    |
| 26              | *emergency health service/                   |
| 27              | emergency service\$.ti,ab,de.                |
| 28              | (emergency adj2 service\$).ti,ab,de.         |
| 29              | emergency department.mp. or *emergency ward/ |
| 30              | emergency department\$.ti,ab,de.             |
| 31              | (emergency adj5 department\$).ti,ab,de.      |
| 32              | *medical service/                            |
| 33              | (medical adj5 service).ti,ab,de.             |
| 34              | exp delivery of health care/                 |
| 35              | exp health service\$/                        |
| 36              | exp ambulatory care facilities/              |
| 37              | exp ambulatory care information systems/     |
| 38              | exp primary care/                            |
| 39              | exp physicians, family/                      |
| 40              | exp primary health care/                     |

| <b>Part 2: Cost/service utilisation</b> |                                       |
|-----------------------------------------|---------------------------------------|
| 41                                      | high cost.mp.                         |
| 42                                      | high cost\$.ti,ab,de.                 |
| 43                                      | high?cost\$.ti,ab,de.                 |
| 44                                      | (high adj5 cost\$.ti,ab,de.           |
| 45                                      | frequent cost.mp.                     |
| 46                                      | frequent cost\$.ti,ab,de.             |
| 47                                      | (frequent adj5 cost\$.ti,ab,de.       |
| 48                                      | high expenditure.mp.                  |
| 49                                      | high expenditure.ti,ab,de.            |
| 50                                      | (high adj5 expenditure).ti,ab,de.     |
| 51                                      | high expense.mp.                      |
| 52                                      | high expense.ti,ab,de.                |
| 53                                      | (high adj5 expense).ti,ab,de.         |
| 54                                      | frequent user.mp.                     |
| 55                                      | frequent user.ti,ab,de.               |
| 56                                      | (frequent adj5 user).ti,ab,de.        |
| 57                                      | high user.mp.                         |
| 58                                      | high user.ti,ab,de.                   |
| 59                                      | (high adj5 user).ti,ab,de.            |
| 60                                      | high utiliser.mp.                     |
| 61                                      | high utiliser\$.ti,ab,de.             |
| 62                                      | high utilizer.mp.                     |
| 63                                      | high utilizer\$.ti,ab,de.             |
| 64                                      | (high adj5 utiliser\$.ti,ab,de.       |
| 65                                      | (high adj5 utilizer\$.ti,ab,de.       |
| 66                                      | frequent utiliser.mp.                 |
| 67                                      | frequent utilizer.mp.                 |
| 68                                      | frequent utilizer\$.ti,ab,de.         |
| 69                                      | frequent utiliser\$.ti,ab,de.         |
| 70                                      | (frequent adj5 utilizer\$.ti,ab,de.   |
| 71                                      | (frequent adj5 utiliser\$.ti,ab,de.   |
| 72                                      | high utilisation.mp.                  |
| 73                                      | high utilization.mp.                  |
| 74                                      | high utilization.ti,ab,de.            |
| 75                                      | high utilisation.ti,ab,de.            |
| 76                                      | (high adj5 utilization).ti,ab,de.     |
| 77                                      | (high adj5 utilisation).ti,ab,de.     |
| 78                                      | frequent utilisation.mp.              |
| 79                                      | frequent utilization.mp.              |
| 80                                      | frequent utilisation.ti,ab,de.        |
| 81                                      | frequent utilization.ti,ab,de.        |
| 82                                      | (frequent adj5 utilisation).ti,ab,de. |

|                                         |                                        |
|-----------------------------------------|----------------------------------------|
| 83                                      | (frequent adj5 utilization).ti,ab,de.  |
| 84                                      | high need.mp.                          |
| 85                                      | high need.ti,ab,de.                    |
| 86                                      | (high adj5 need).ti,ab,de.             |
| 87                                      | high attend.mp.                        |
| 88                                      | high attend\$.ti,ab,de.                |
| 89                                      | (high adj5 attend\$).ti,ab,de.         |
| 90                                      | superutilizer.mp.                      |
| 91                                      | superutilizer.ti,ab,de.                |
| 92                                      | exp health expenditures/               |
| 93                                      | exp patient acceptance of health care/ |
| 94                                      | exp health care costs/                 |
| 95                                      | exp health services accessibility/     |
| 96                                      | exp cost benefit analysis/             |
| 97                                      | exp practice patterns physicians/      |
| 98                                      | exp efficiency organizational/         |
| 99                                      | exp health services misuse/            |
| 100                                     | exp patient care team/                 |
| 101                                     | exp case management/                   |
| 102                                     | exp office visits/                     |
| 103                                     | exp referral/                          |
| <b>Part 3: Anxiety/Depression terms</b> |                                        |
| 104                                     | exp anxiety/                           |
| 105                                     | (anxiety adj5 disorder\$.tw            |
| 106                                     | exp panic disorder/                    |
| 107                                     | (panic adj5 disorder\$.tw              |
| 108                                     | panic.tw                               |
| 109                                     | (panic adj5 attack\$.tw                |
| 110                                     | fear.tw                                |
| 111                                     | exp depression/                        |
| 112                                     | (depressive adj5 disorder\$.tw         |



## Appendix 2 - Data extraction form adapted from the framework of Hayden et al.

### Eligibility criteria for the title and abstract screening phase

#### Inclusion criteria

| Study design                                                                                                                                                                                                                                                                                                                                                                                                                                            | Assessment                    | Comment |
|---------------------------------------------------------------------------------------------------------------------------------------------------------------------------------------------------------------------------------------------------------------------------------------------------------------------------------------------------------------------------------------------------------------------------------------------------------|-------------------------------|---------|
| Is it:<br>[1] A cohort study (prospective or retrospective)<br>[2] A case-control or nested case-control<br>[3] A cross-sectional study                                                                                                                                                                                                                                                                                                                 | Yes<br>No<br>Unclear          |         |
| <b>Population</b>                                                                                                                                                                                                                                                                                                                                                                                                                                       |                               |         |
| [1] Adults aged $\geq 18$ years<br>[2] Patients are high users of health care<br>[2] Patients accrue high health care costs<br>Including: high cost patients, high users, distressed high users/utilisers of care, frequent attenders in primary care, secondary care, frequent attenders at an emergency department<br><br><b>NB:</b> Please answer YES if patients with anxiety/depression are a subgroup; please answer YES if mixed age population. | Yes<br>No<br>Unclear          |         |
| <b>Comparators</b>                                                                                                                                                                                                                                                                                                                                                                                                                                      |                               |         |
| [1] Comparison group includes non-high use OR non-high cost patients<br>[2] Comparison group includes frequent/high users without anxiety/depression                                                                                                                                                                                                                                                                                                    | Yes<br>No<br>Unclear          |         |
| <b>Outcome</b>                                                                                                                                                                                                                                                                                                                                                                                                                                          |                               |         |
| Did the study report any of the following outcomes:<br>[1] Prevalence of anxiety/depression in high users/high cost patients<br>[2] Odds Ratio of use of care between depressed/anxious vs non-depressed/anxious participants                                                                                                                                                                                                                           | Yes<br>No<br>Unclear          |         |
| <b>Final decision (please tick)</b>                                                                                                                                                                                                                                                                                                                                                                                                                     | Include<br>Exclude<br>Unclear |         |

#### Exclusion criteria

| Reasons for exclusion of study from review (please circle where appropriate) |                                                                                                                                                                                                                                                                                                                                                         |
|------------------------------------------------------------------------------|---------------------------------------------------------------------------------------------------------------------------------------------------------------------------------------------------------------------------------------------------------------------------------------------------------------------------------------------------------|
| Study design                                                                 | [1] Clinical trial<br>[2] Case study<br>[3] Qualitative study                                                                                                                                                                                                                                                                                           |
| Population                                                                   | Age: <18<br>All specific medical specialties/illnesses including:<br>[1] Paediatric patients<br>[2] Palliative care<br>[3] Obstetrics<br>[4] Transplant<br>[5] Neurodegenerative disease<br>[6] Oral, maxillofacial, dentistry<br>[7] Nephrology<br>[8] Infectious diseases<br>[9] Virology and HIV/AIDS<br>[10] Physiotherapy<br>[11] Cosmetic surgery |

|              |                                                                                                                                              |
|--------------|----------------------------------------------------------------------------------------------------------------------------------------------|
|              | [12] Psychiatry/mental health services<br>[13] Specific diseases e.g. diabetes, cardiovascular                                               |
| Intervention | [1] Randomised clinical trial<br>[2] Interventions in populations who are not high use/cost<br>[3] Screening/diagnosis/treatment evaluations |
| Comparator   | Studies without non-high cost/non-high users of health care                                                                                  |
| Outcomes     | Relevant outcomes not assessed:<br>[1] No anxiety/depression assessment<br>[2] No assessment of health use OR cost                           |
| Other        | Duplicate publication<br>Other (explain)                                                                                                     |

| <b>Eligibility criteria for Full Text</b>                                                                                    |                      |
|------------------------------------------------------------------------------------------------------------------------------|----------------------|
| Satisfaction of eligibility criteria above                                                                                   | Yes<br>No<br>Unclear |
| Cost studies will include patients either in the top 1%, 5% 10% and 20% of most costly patients.                             | Yes<br>No<br>Unclear |
| Studies of general health care use will include patients in the top 1%, 5%, 10% or 20% of health care use.                   | Yes<br>No<br>Unclear |
| Studies in primary care will either include patients with 10 or more visits per year or those patients in the top 10% of use | Yes<br>No<br>Unclear |
| Studies of ED will include patients with at least 4 visits per annum.                                                        | Yes<br>No<br>Unclear |

### Organisation

| Organisational aspect | Exclude                                                                                                                       | Include |
|-----------------------|-------------------------------------------------------------------------------------------------------------------------------|---------|
| <b>Reviewer/date:</b> | <b>Checked by:</b>                                                                                                            |         |
| Author/Year           |                                                                                                                               |         |
| Journal/Source        |                                                                                                                               |         |
| Country of origin     |                                                                                                                               |         |
| Publication type      | Full text/Abstract/Book chapter/progress report/<br>Other – please specify                                                    |         |
| Fate                  | Decision: pending/Checked reference/Use for discussion/Exclude without listing/Exclude with listing<br>Other – please specify |         |
| Notes                 |                                                                                                                               |         |

## Data extraction template for full-text articles

| General study characteristics                                                                                                         |                                                                                                                                                                                                                                                                                                                                                                                                                                                                                                                                                                                                                                                                                                                                                                                                                                                                                                                                                                        |
|---------------------------------------------------------------------------------------------------------------------------------------|------------------------------------------------------------------------------------------------------------------------------------------------------------------------------------------------------------------------------------------------------------------------------------------------------------------------------------------------------------------------------------------------------------------------------------------------------------------------------------------------------------------------------------------------------------------------------------------------------------------------------------------------------------------------------------------------------------------------------------------------------------------------------------------------------------------------------------------------------------------------------------------------------------------------------------------------------------------------|
| Location of study<br>Please specify country, type of health care system, health care setting (primary/secondary care/ED/all settings) |                                                                                                                                                                                                                                                                                                                                                                                                                                                                                                                                                                                                                                                                                                                                                                                                                                                                                                                                                                        |
| Study aims                                                                                                                            | Reported/Not reported                                                                                                                                                                                                                                                                                                                                                                                                                                                                                                                                                                                                                                                                                                                                                                                                                                                                                                                                                  |
| Date of recruitment                                                                                                                   | From _____ to _____<br>Median (range):#<br>Mean:#                                                                                                                                                                                                                                                                                                                                                                                                                                                                                                                                                                                                                                                                                                                                                                                                                                                                                                                      |
| Length of follow-up of outcome of interest + length of follow-up of study                                                             | From _____ to _____<br>Median (range):#<br>Mean (standard deviation):#                                                                                                                                                                                                                                                                                                                                                                                                                                                                                                                                                                                                                                                                                                                                                                                                                                                                                                 |
| Outcome definition                                                                                                                    | [1] Anxiety or depression or both<br>Median (range):#<br>Mean (standard deviation):#<br>[2] Health care use<br>Median (range):#<br>Mean (standard deviation):#<br>[3] Health care cost<br>Median (range):#<br>Mean (standard deviation):#                                                                                                                                                                                                                                                                                                                                                                                                                                                                                                                                                                                                                                                                                                                              |
| Outcome measurement                                                                                                                   | Did the study report measurements for any of the following outcomes:<br>[1] Prevalence of anxiety/depression <ul style="list-style-type: none"> <li>➤ Specify measures of central tendency and variation)</li> <li>➤ Specify instrument and range (e.g. PHQ-9, GAD-7, SCID, etc.)</li> <li>➤ Is it self-report?</li> <li>➤ Is it standardised?</li> <li>➤ Is it validated to context?</li> <li>➤ Is it a standardised clinical interview</li> <li>➤ Is it a clinical interview with diagnosis according to recognised diagnostic system</li> </ul> [2] Magnitude of cost or use of health care associated with the presence of anxiety/depression. Consider: <ul style="list-style-type: none"> <li>➤ Frequency and range of scheduled contacts in primary care, secondary care or ED</li> <li>➤ Cost, range, of contacts in above settings</li> <li>➤ Frequency and range of inpatient admissions</li> <li>➤ Cost, range, currency of inpatient admissions</li> </ul> |
| Covariates/Confounders considered (please detail)                                                                                     | [1] Did the study report measurements used to report: <ul style="list-style-type: none"> <li>➤ Patient characteristics and contexts associated with high service use/costs among patients with anxiety depression?</li> </ul> <i>Please consider patient demographic (e.g. age, ethnicity, gender, homelessness) and clinical factors (e.g. anxiety/depression management, physical co-morbidities)</i>                                                                                                                                                                                                                                                                                                                                                                                                                                                                                                                                                                |
| Relationship between outcome and relevant covariates/confounders                                                                      | Is the relationship statistically significant?<br>Yes/No<br><i>If Yes:</i><br>OR/mean difference (95% confidence intervals):#<br><br><i>If No, offer reason:</i><br>Low powered or inconclusive study<br>A true negative study                                                                                                                                                                                                                                                                                                                                                                                                                                                                                                                                                                                                                                                                                                                                         |

|                                |                                                                                     |
|--------------------------------|-------------------------------------------------------------------------------------|
|                                | Other reasons (please specify)                                                      |
| Power calculation              | Yes/No/Not reported<br><br>Calculated sample size:#<br>Sample size achieved: Yes/No |
| Funding                        | Unclear<br>Not reported<br>Please state where reported                              |
| Conflict of interest statement | Yes/No/Not reported                                                                 |

| Observational study characteristics |                                                                                                                   |
|-------------------------------------|-------------------------------------------------------------------------------------------------------------------|
| Sample size                         |                                                                                                                   |
| Number of excluded patients         |                                                                                                                   |
| Recruitment method                  |                                                                                                                   |
| Type of observational study         | Cohort studies (prospective/retrospective)<br>Case-control studies/nested case-control<br>Cross-sectional studies |
| Are groups comparable               | Yes/No<br><br>If No, please specify                                                                               |
| Any confounders considered?         | Yes/No<br>If Yes, specify which<br><br>If No, please specify                                                      |
| Analyses                            |                                                                                                                   |
| Drop-outs stated                    | Yes/No<br><br>If Yes: number in each group                                                                        |

| Patient characteristics                                                                                                                                          |                               |                        |          |
|------------------------------------------------------------------------------------------------------------------------------------------------------------------|-------------------------------|------------------------|----------|
| Notes: Any relationship with outcomes?<br>Yes/No/Not reported<br><br><i>If Yes, please state statistical parameters and significance level where appropriate</i> | Exposure (i.e. High use/cost) | Control (Low use/cost) | Comments |
| Number of patients                                                                                                                                               |                               |                        |          |
| Country                                                                                                                                                          |                               |                        |          |
| Age mean/median (standard deviation/range)                                                                                                                       |                               |                        |          |
| Ethnicity (Number, %)                                                                                                                                            |                               |                        |          |
| Sex (Number, %)                                                                                                                                                  | Male:<br>Female:              | Male:<br>Female:       |          |
| Homelessness specified in study?<br>Yes/No                                                                                                                       |                               |                        |          |
| No of patients recruited                                                                                                                                         |                               |                        |          |
| No of patients allocated                                                                                                                                         |                               |                        |          |
| No of patients evaluated                                                                                                                                         |                               |                        |          |
| No of drop-outs                                                                                                                                                  |                               |                        |          |
| Reasons for drop-out                                                                                                                                             |                               |                        |          |
| Definition of anxiety/depression in the groups:                                                                                                                  |                               |                        |          |

|                                                                                                                                                                                                                                  |  |  |  |
|----------------------------------------------------------------------------------------------------------------------------------------------------------------------------------------------------------------------------------|--|--|--|
| [1] Via standardised questionnaire (validated or not) semi-structured or clinical interview?<br><i>Please specify</i><br>[2] Definition of high/low ranges or diagnosis (yes/no)<br>[3] Is anxiety/depression managed?<br>Yes/No |  |  |  |
| Clinical status at recruitment :<br>[1] Comorbidities<br>Yes/No<br><i>If yes, please state</i><br>Number:                                                                                                                        |  |  |  |
| Adverse event?<br>Yes/No<br><br><i>If Yes, please detail</i>                                                                                                                                                                     |  |  |  |

**Outcome details**

*The following table can be copied for every relevant outcome assessed (please fill out fields only where applicable)*

| Outcome assessed                                                                                                                                         |  |
|----------------------------------------------------------------------------------------------------------------------------------------------------------|--|
| Definition of each outcome                                                                                                                               |  |
| Time of assessment of each outcome                                                                                                                       |  |
| Timing of assessment                                                                                                                                     |  |
| Length of follow up for each outcome                                                                                                                     |  |
| Method of measurement                                                                                                                                    |  |
| No of patients evaluated for each outcome, as stated above                                                                                               |  |
| Confounding variables were considered (e.g. age, gender, ethnicity, homelessness, physical co-morbidities, managed depression)<br><i>Please list all</i> |  |
| How were the confounding variables controlled?                                                                                                           |  |

| Methodological quality summary                                                                                                      |     |             |    |        |          |
|-------------------------------------------------------------------------------------------------------------------------------------|-----|-------------|----|--------|----------|
| Reviewer/Date:                                                                                                                      |     | Checked by: |    |        |          |
| Contents (please refer to tables below for guidance)                                                                                | Yes | Partly      | No | Unsure | Comments |
| Study participation                                                                                                                 |     |             |    |        |          |
| Study attrition                                                                                                                     |     |             |    |        |          |
| Measurement of outcome                                                                                                              |     |             |    |        |          |
| Analytical approach                                                                                                                 |     |             |    |        |          |
| Specify confounding variables measurements (e.g. age, gender, ethnicity, homelessness, physical co-morbidities, managed depression) |     |             |    |        |          |

1  
2  
3  
4  
5  
6  
7  
8  
9  
10  
11  
12  
13  
14  
15  
16  
17  
18  
19  
20  
21  
22  
23  
24  
25  
26  
27  
28  
29  
30  
31  
32  
33  
34  
35  
36  
37  
38  
39  
40  
41  
42  
43  
44  
45  
46  
47  
48  
49  
50  
51  
52  
53  
54  
55  
56  
57  
58  
59  
60

|                                                         |                  |                       |                   |  |
|---------------------------------------------------------|------------------|-----------------------|-------------------|--|
| Specify method of controlling for confounding variables |                  |                       |                   |  |
| Summary                                                 | Low risk of bias | Moderate risk of bias | High risk of bias |  |
| Remarks:                                                |                  |                       |                   |  |

For peer review only

### Appendix 3

#### Quality assessment form adapted from the Ottawa-Newcastle scale (NOS) for assessing non-randomised studies

|                                                 |                                                                                                                                                                                                                                                                                                                                                                                                                                                                                                                                                                                                                                                                                                                                                                                                                                                                                                                                                      | Yes/No/Unclear |
|-------------------------------------------------|------------------------------------------------------------------------------------------------------------------------------------------------------------------------------------------------------------------------------------------------------------------------------------------------------------------------------------------------------------------------------------------------------------------------------------------------------------------------------------------------------------------------------------------------------------------------------------------------------------------------------------------------------------------------------------------------------------------------------------------------------------------------------------------------------------------------------------------------------------------------------------------------------------------------------------------------------|----------------|
| Selection of participants                       | [1] Was the inclusion/exclusion clearly described? (for example, age, diagnosis status, anxiety/depression)<br>[2] Was inclusion/exclusion assessed using valid and reliable measures? (for example, clinical interview to ascertain anxiety/depression or standardised questionnaires)<br>[3] Was recruitment strategy clearly described?<br>[4] Did the investigators ensure that the exposed/unexposed group were comparable (for example did they use stratification or matching)                                                                                                                                                                                                                                                                                                                                                                                                                                                                |                |
| Adequate description of study population        | [1] Was study population well characterised? <ul style="list-style-type: none"> <li>➤ Age</li> <li>➤ Sex</li> <li>➤ Ethnicity</li> <li>➤ Homelessness (yes/no)</li> <li>➤ Suitable definition of anxiety/depression</li> </ul>                                                                                                                                                                                                                                                                                                                                                                                                                                                                                                                                                                                                                                                                                                                       |                |
| Valid method for evaluating outcome             | [1] Was there a definition provided for the key outcomes: <ul style="list-style-type: none"> <li>➤ Anxiety/depression caseness or diagnosis</li> <li>➤ Health care use level and range</li> <li>➤ Health care costs and range</li> </ul> [2] Was there a method used to ascertain anxiety/depression clearly defined? <ul style="list-style-type: none"> <li>➤ Standardised questionnaires validated to the setting</li> <li>➤ Standardised questionnaire not validated for the setting</li> <li>➤ Clinical interview based on the ICD or DSM (version specified)</li> <li>➤ Semi-structured research interview based on ICD or DSM version specified</li> </ul> [3] Was a valid and reliable measure used to report outcomes? For example <ul style="list-style-type: none"> <li>➤ Frequency/range of health care use</li> <li>➤ Mean/variation/currency of health care cost</li> <li>➤ Clinical interview/Questionnaire score/variation</li> </ul> |                |
| Adequate follow-up period<br>(where applicable) | [1] Was follow-up adequate enough for the outcome to occur?<br>[2] Was follow-up period the same across groups?<br>[3] Were differences in follow-up adjusted for using statistical techniques?                                                                                                                                                                                                                                                                                                                                                                                                                                                                                                                                                                                                                                                                                                                                                      |                |
| Completeness of follow-up<br>(where applicable) | [1] Were drop-out rates and reasons for drop-out similar across exposed and unexposed?<br>[2] Were numbers of drop-outs/withdrawals documented at each time point?                                                                                                                                                                                                                                                                                                                                                                                                                                                                                                                                                                                                                                                                                                                                                                                   |                |
| Analysis and control of confounders             | [1] Does the study identify any confounders?<br>[2] Does the study control for these confounders?                                                                                                                                                                                                                                                                                                                                                                                                                                                                                                                                                                                                                                                                                                                                                                                                                                                    |                |
| Sample size calculation                         | [1] Is the sample size adequate?<br>[2] Did the study describe how the sample size was calculated?<br>[3] Was the sample size large enough to detect differences in events between groups? (i.e. mean change)                                                                                                                                                                                                                                                                                                                                                                                                                                                                                                                                                                                                                                                                                                                                        |                |
| Analytical methods appropriate                  | [1] Was the type of analysis appropriate for the type of outcome data? For example:                                                                                                                                                                                                                                                                                                                                                                                                                                                                                                                                                                                                                                                                                                                                                                                                                                                                  |                |

|  |                                                                                                                                                                                                                                                                                               |  |
|--|-----------------------------------------------------------------------------------------------------------------------------------------------------------------------------------------------------------------------------------------------------------------------------------------------|--|
|  | <ul style="list-style-type: none"><li>➤ Continuous – Mixed model, ANCOVA</li><li>➤ Categorical - Mixed model for categorical outcome</li><li>➤ Dichotomous – Logistic regression</li></ul> <p>[2] Was loss to follow-up accounted for in the analysis (e.g. through sensitivity analysis)</p> |  |
|--|-----------------------------------------------------------------------------------------------------------------------------------------------------------------------------------------------------------------------------------------------------------------------------------------------|--|

For peer review only



## Abbreviations

PROSPERO: Prospective Registering of Systematic Reviews; CINAHL: Cumulative Index for Nursing and Allied Health Literature; NHS: National Health Service; GP: General Practitioner; ED: Emergency Department; ANCOVA: Analysis of Covariance; PRISMA: Preferred Reporting Items for Systematic Reviews and Meta-Analysis; NOS: The Newcastle – Ottawa Scale; PHQ-9: Patient Health Questionnaire-9; GAD-7: Generalised Anxiety Disorder Assessment-7; SCID: Structured Clinical Interview for DSM; ICD: International Classification of Diseases; DSM: Diagnostic and Statistical Manual of Mental Disorders.

# Reporting checklist for protocol of a systematic review.

Based on the PRISMA-P guidelines.

## Instructions to authors

Complete this checklist by entering the page numbers from your manuscript where readers will find each of the items listed below.

Your article may not currently address all the items on the checklist. Please modify your text to include the missing information. If you are certain that an item does not apply, please write "n/a" and provide a short explanation.

Upload your completed checklist as an extra file when you submit to a journal.

In your methods section, say that you used the PRISMA-P reporting guidelines, and cite them as:

Moher D, Shamseer L, Clarke M, Ghersi D, Liberati A, Petticrew M, Shekelle P, Stewart LA. Preferred Reporting Items for Systematic Review and Meta-Analysis Protocols (PRISMA-P) 2015 statement. *Syst Rev.* 2015;4(1):1.

|                |                     | Reporting Item                                                                                                                                                              | Page Number |
|----------------|---------------------|-----------------------------------------------------------------------------------------------------------------------------------------------------------------------------|-------------|
| Identification | <a href="#">#1a</a> | Identify the report as a protocol of a systematic review                                                                                                                    | 3           |
| Update         | <a href="#">#1b</a> | If the protocol is for an update of a previous systematic review, identify as such                                                                                          | N/A         |
|                | <a href="#">#2</a>  | If registered, provide the name of the registry (such as PROSPERO) and registration number                                                                                  | 3           |
| Contact        | <a href="#">#3a</a> | Provide name, institutional affiliation, e-mail address of all protocol authors; provide physical mailing address of corresponding author                                   | 1           |
| Contribution   | <a href="#">#3b</a> | Describe contributions of protocol authors and identify the guarantor of the review                                                                                         | 18          |
|                | <a href="#">#4</a>  | If the protocol represents an amendment of a previously completed or published protocol, identify as such and list changes; otherwise, state plan for documenting important | N/A         |

|                                         |                      |                                                                                                                                                                                                                               |            |
|-----------------------------------------|----------------------|-------------------------------------------------------------------------------------------------------------------------------------------------------------------------------------------------------------------------------|------------|
|                                         |                      | protocol amendments                                                                                                                                                                                                           |            |
| Sources                                 | <a href="#">#5a</a>  | Indicate sources of financial or other support for the review                                                                                                                                                                 | 19         |
| Sponsor                                 | <a href="#">#5b</a>  | Provide name for the review funder and / or sponsor                                                                                                                                                                           | N/A        |
| Role of sponsor or funder               | <a href="#">#5c</a>  | Describe roles of funder(s), sponsor(s), and / or institution(s), if any, in developing the protocol                                                                                                                          | N/A        |
| Rationale                               | <a href="#">#6</a>   | Describe the rationale for the review in the context of what is already known                                                                                                                                                 | 5          |
| Objectives                              | <a href="#">#7</a>   | Provide an explicit statement of the question(s) the review will address with reference to participants, interventions, comparators, and outcomes (PICO)                                                                      | 5          |
| Eligibility criteria                    | <a href="#">#8</a>   | Specify the study characteristics (such as PICO, study design, setting, time frame) and report characteristics (such as years considered, language, publication status) to be used as criteria for eligibility for the review | 6-7        |
| Information sources                     | <a href="#">#9</a>   | Describe all intended information sources (such as electronic databases, contact with study authors, trial registers or other grey literature sources) with planned dates of coverage                                         | 7          |
| Search strategy                         | <a href="#">#10</a>  | Present draft of search strategy to be used for at least one electronic database, including planned limits, such that it could be repeated                                                                                    | Appendix 1 |
| Study records - data management         | <a href="#">#11a</a> | Describe the mechanism(s) that will be used to manage records and data throughout the review                                                                                                                                  | 7          |
| Study records - selection process       | <a href="#">#11b</a> | State the process that will be used for selecting studies (such as two independent reviewers) through each phase of the review (that is, screening, eligibility and inclusion in meta-analysis)                               | 9          |
| Study records - data collection process | <a href="#">#11c</a> | Describe planned method of extracting data from reports (such as piloting forms, done independently, in duplicate), any processes for obtaining and confirming data from investigators                                        | 9          |
| Data items                              | <a href="#">#12</a>  | List and define all variables for which data will be sought (such as PICO items, funding sources), any pre-planned data assumptions and simplifications                                                                       | 6-7        |

|                                    |                                    |                      |                                                                                                                                                                                                                                                           |   |
|------------------------------------|------------------------------------|----------------------|-----------------------------------------------------------------------------------------------------------------------------------------------------------------------------------------------------------------------------------------------------------|---|
| 1<br>2<br>3<br>4<br>5              | Outcomes and prioritization        | <a href="#">#13</a>  | List and define all outcomes for which data will be sought, including prioritization of main and additional outcomes, with rationale                                                                                                                      | 7 |
| 6<br>7<br>8<br>9<br>10<br>11<br>12 | Risk of bias in individual studies | <a href="#">#14</a>  | Describe anticipated methods for assessing risk of bias of individual studies, including whether this will be done at the outcome or study level, or both; state how this information will be used in data synthesis                                      | 8 |
| 13<br>14<br>15<br>16               | Data synthesis                     | <a href="#">#15a</a> | Describe criteria under which study data will be quantitatively synthesised                                                                                                                                                                               | 9 |
| 17<br>18<br>19<br>20<br>21<br>22   |                                    | <a href="#">#15b</a> | If data are appropriate for quantitative synthesis, describe planned summary measures, methods of handling data and methods of combining data from studies, including any planned exploration of consistency (such as I <sup>2</sup> , Kendall's $\tau$ ) | 9 |
| 23<br>24<br>25<br>26               |                                    | <a href="#">#15c</a> | Describe any proposed additional analyses (such as sensitivity or subgroup analyses, meta-regression)                                                                                                                                                     | 9 |
| 27<br>28<br>29<br>30               |                                    | <a href="#">#15d</a> | If quantitative synthesis is not appropriate, describe the type of summary planned                                                                                                                                                                        | 9 |
| 31<br>32<br>33<br>34<br>35         | Meta-bias(es)                      | <a href="#">#16</a>  | Specify any planned assessment of meta-bias(es) (such as publication bias across studies, selective reporting within studies)                                                                                                                             | 9 |
| 36<br>37<br>38<br>39<br>40<br>41   | Confidence in cumulative evidence  | <a href="#">#17</a>  | Describe how the strength of the body of evidence will be assessed (such as GRADE)                                                                                                                                                                        | 9 |

42 The PRISMA-P checklist is distributed under the terms of the Creative Commons Attribution License  
 43 CC-BY 4.0. This checklist can be completed online using <https://www.goodreports.org/>, a tool made  
 44 by the [EQUATOR Network](#) in collaboration with [Penelope.ai](#)  
 45  
 46  
 47  
 48  
 49  
 50  
 51  
 52  
 53  
 54  
 55  
 56  
 57  
 58  
 59  
 60

# BMJ Open

## The prevalence of common mental health disorders in adults who are high or costly users of health care services: Protocol for a systematic review and meta-analysis

|                                 |                                                                                                                                                                                                                                                                                                                                                                                                                                                                                                                                                                                                            |
|---------------------------------|------------------------------------------------------------------------------------------------------------------------------------------------------------------------------------------------------------------------------------------------------------------------------------------------------------------------------------------------------------------------------------------------------------------------------------------------------------------------------------------------------------------------------------------------------------------------------------------------------------|
| Journal:                        | <i>BMJ Open</i>                                                                                                                                                                                                                                                                                                                                                                                                                                                                                                                                                                                            |
| Manuscript ID                   | bmjopen-2018-028295.R2                                                                                                                                                                                                                                                                                                                                                                                                                                                                                                                                                                                     |
| Article Type:                   | Protocol                                                                                                                                                                                                                                                                                                                                                                                                                                                                                                                                                                                                   |
| Date Submitted by the Author:   | 15-Jul-2019                                                                                                                                                                                                                                                                                                                                                                                                                                                                                                                                                                                                |
| Complete List of Authors:       | Jadhakhan, Ferozkhan; University of Birmingham, Institute of Mental Health, School of Psychology, College of Life and Environmental Sciences; Birmingham and Solihull Mental Health NHS Foundation Trust, Research and Innovation<br>Lindner, Oana; University of Leeds, Division of Psychological and Social Medicine, Leeds Institute of Health Sciences, School of Medicine, Level 10, Worsley Building, Clarendon Way, University of Leeds<br>Blakemore, Amy; University of Manchester,<br>Guthrie, Elspeth; University of Leeds Leeds Institute of Health Sciences, Psychological and Social Medicine |
| <b>Primary Subject Heading</b>: | Mental health                                                                                                                                                                                                                                                                                                                                                                                                                                                                                                                                                                                              |
| Secondary Subject Heading:      | Health economics, Mental health, Emergency medicine, General practice / Family practice                                                                                                                                                                                                                                                                                                                                                                                                                                                                                                                    |
| Keywords:                       | Common Mental Health Disorders, Depression, Anxiety, Health Care Utilisation, High Cost, High Health Care Cost                                                                                                                                                                                                                                                                                                                                                                                                                                                                                             |
|                                 |                                                                                                                                                                                                                                                                                                                                                                                                                                                                                                                                                                                                            |

SCHOLARONE™  
Manuscripts

1  
2  
3 **The prevalence of common mental health disorders in adults who are high or costly users**  
4 **of health care services: Protocol for a systematic review and meta-analysis**  
5  
6

7 Dr Ferozkhan Jadhakhan<sup>1\*</sup>, Dr Oana C Lindner<sup>2\*</sup>, Dr Amy Blakemore<sup>3</sup>, Professor Elspeth A  
8  
9 Guthrie<sup>2</sup>  
10

11  
12 Correspondence author: Dr Ferozkhan Jadhakhan, [f.jadhakhan@bham.ac.uk](mailto:f.jadhakhan@bham.ac.uk)  
13  
14

15 \*Dr Jadhakhan and Dr Lindner are joint first authors of this manuscript.  
16  
17

- 18  
19 1. School of Psychology, College of Life and Environmental Sciences, Edgbaston,  
20 University of Birmingham, B15 2TT, UK  
21  
22 2. Division of Psychological and Social Medicine, Leeds Institute of Health Sciences,  
23 School of Medicine, Level 10, Worsley Building, Clarendon Way, University of Leeds,  
24 Leeds, LS2 9NL, UK.  
25  
26 3. Division of Nursing, Social Work and Midwifery, School of Health Sciences,  
27 Manchester Academic Health Science Centre, The University of Manchester, Jean  
28 McFarlane Building, Oxford Road, Manchester, M13 9PL, UK  
29  
30  
31  
32  
33  
34  
35  
36  
37  
38  
39

40 Email:

41  
42 Dr Oana C Lindner: [O.C.Lindner@leeds.ac.uk](mailto:O.C.Lindner@leeds.ac.uk)  
43

44 Dr Ferozkhan Jadhakhan: [F.Jadhakhan@bham.ac.uk](mailto:F.Jadhakhan@bham.ac.uk)  
45

46 Dr Amy Blakemore: [amy.blakemore@manchester.ac.uk](mailto:amy.blakemore@manchester.ac.uk)  
47

48 Professor Elspeth A Guthrie: [E.A.Guthrie@leeds.ac.uk](mailto:E.A.Guthrie@leeds.ac.uk)  
49  
50  
51  
52  
53  
54  
55  
56

57 **Word count: 4044**  
58  
59  
60

1  
2  
3 **Keywords:** Common Mental Health Disorders, Depression, Anxiety, Health Care Use,  
4  
5 Frequent attenders, High Cost, High Health Care Cost, Prevalence  
6  
7  
8  
9  
10  
11  
12  
13  
14  
15  
16  
17  
18  
19  
20  
21  
22  
23  
24  
25  
26  
27  
28  
29  
30  
31  
32  
33  
34  
35  
36  
37  
38  
39  
40  
41  
42  
43  
44  
45  
46  
47  
48  
49  
50  
51  
52  
53  
54  
55  
56  
57  
58  
59  
60

For peer review only

## ABSTRACT

**Introduction:** In all health care settings, a small proportion of patients account for a large level of health care use and associated high health care costs. Depression and anxiety are common co-morbidities in patients who are high users of care. The aims of this systematic review are to: (1) estimate the prevalence of anxiety/depression in adults who are high users of general physical health care services and/or who accrue high health care costs (2) estimate the magnitude of health care use associated with the presence of anxiety/depression.

**Methods and Analysis:** This review will include any studies where patients are high users of primary, secondary, or emergency health care services and/or accrue high health care costs. This is the first systematic review to focus on patients who are over the age of 18 whose degree of anxiety/depression has been evaluated with a standardised questionnaire or by a clinical interview generating a diagnosis according to international diagnostic criteria. The review will include eligible studies indexed in MEDLINE, PsychINFO, EMBASE, CINAHL, PROSPERO, Cochrane Library from inception to 1<sup>st</sup> April 2019. We will estimate the prevalence of anxiety/depression in these populations, and the magnitude of use associated with anxiety/depression across various general physical health care settings. We will provide a narrative description of findings and factors that may influence them. A meta-analysis may be pursued if the degree of heterogeneity across studies is acceptable.

**Ethics and dissemination:** This systematic review will use data from existing studies, hence no ethical approvals are required. Findings will be disseminated in a peer-reviewed publication and at relevant academic meetings.

**PROSPERO Registration number:** CRD42018102628



## STRENGTHS AND LIMITATIONS

1. This systematic review will include both studies of high health care use and/or high health care costs.
2. It will include studies undertaken in general physical health care settings - primary, secondary care, and emergency departments.
3. It will focus upon studies that have specifically recorded the presence of depression and/or anxiety in the high cost/high use population studied, using standardized questionnaires or clinical interviews leading to a clinical diagnosis.
4. We will provide a narrative summary of findings with sources of variation and bias based on a comprehensive data extraction framework, with relevant subgroup analyses and interpretations based upon: country, type of health care system, location of study (primary, secondary care, emergency department, or total health care), and way of recording depression/anxiety.
5. A meta-analysis may not be feasible given a likely high level of heterogeneity in outcome definitions and measurements.

## INTRODUCTION

The cost of health care in developed countries has continued to grow over recent years and the current projected trajectories of growth are unsustainable [1]. This situation is particularly severe in the United States (US), where the cost of health care is nearly twice that of most other developed countries [1,2]. Across health care systems, a small proportion of patients account for a large proportion of health care use and cost [3]. These findings have consistently emerged from studies of general practice (GP) attendances [4], inpatient length of stay [5,6], outpatient appointments [7], and emergency department (ED) services [8–10]. In primary care, approximately 10% of ‘frequent attenders’ account for up to 39% of all consultations [11]. In the US approximately 5% of patients account for about 50% of all US health care spending [12].

It has been suggested that approximately 50% of high users of health care in primary and secondary care have significant mental health problems, either alone or, in addition to physical health needs, and have been termed ‘distressed high users’ [13]. High use of health care services has been associated with a variety of mental health problems including multiple psychiatric diagnoses [14,15], long histories of psychological ill health [16,17], history of childhood abuse or neglect [18], or addictions [19].

A recent systematic review of the general characteristics of high-cost patients found a high prevalence of multiple chronic conditions amongst this patient population [20]. Mental health problems were also common but varied according to the health care system. In US Medicaid, the prevalence of mental illness ranged from 30-75%, whereas in US Medicare, the prevalence was between 10-25%. One of the main findings of the review was that high-cost patients were more likely to have a mental health disorder. There were, however, no details as to the nature of mental health problems experienced by these high-cost patients, as data were grouped under a broad category of mental and behavioral disorders. This review will focus on patients with

1  
2  
3 depression and anxiety disorders, as they are the most common form of mental disorder. We  
4 will focus upon studies where depression and anxiety are identified through standardized  
5 questionnaires or by clinical interviews leading to a clinical diagnosis. Our review will provide  
6 information about the prevalence of depression/anxiety in both high- and low-income countries  
7 and in different general physical health care settings, namely primary, secondary care, and ED.  
8  
9

10  
11  
12  
13  
14  
15 Several methods have been studied to try to improve the care of high-cost or high-use  
16 patients in the hope of reducing excessive or unnecessary health care use, but efforts to date  
17 have had mixed results [21,22]. Evidence suggests that effectiveness and efficiency of care  
18 improves when interventions are targeted to those who are most likely to benefit [23,24].  
19 Specific interventions for treating depression and anxiety in people with co-morbid physical  
20 health problems have shown promising results [25,26] but have not been targeted at high-cost  
21 patients with co-morbid depression/anxiety.  
22  
23  
24  
25  
26  
27  
28  
29

30  
31 Improved recognition of the association of depression and anxiety with high health care  
32 use and costs will enable treatments that have already been developed for depression/anxiety  
33 in physical disease, to be evaluated in this high need/high cost group. Although there has been  
34 a general call for better integration of physical and mental health services, the treatment and  
35 management of co-morbid depression/anxiety in chronic physical disease remains poorly  
36 managed [27].  
37  
38  
39  
40  
41  
42  
43

44  
45 Our aim is to estimate the prevalence of anxiety/depression in adults who are high users  
46 of health care or accrue high health care costs and where possible to estimate the magnitude of  
47 use associated with anxiety/depression. Segmentation analysis has been suggested as a method  
48 to identify homogeneous groups of patients with similar characteristics, needs, and behaviors  
49 in order to personalize treatment and policy [28]. We are specifically interested in depression  
50 and anxiety, as opposed to all mental health problems, as interventions have already been  
51 developed to treat depression/anxiety when associated with physical disease. Such  
52  
53  
54  
55  
56  
57  
58  
59  
60

1  
2  
3 interventions could be used to target a subgroup of high use/cost patients with the potential to  
4 improve their health and reduce health care use. Other forms of mental illness require other  
5 treatment approaches.  
6  
7  
8  
9

## 10 **Aims**

11  
12 This systematic review will aim to: (1) estimate the prevalence of anxiety and/or depression in  
13 patients who are high users of health care or accrue high health care costs; (2) determine the  
14 magnitude of health care use associated with the presence of anxiety and/or depression.  
15  
16  
17  
18  
19

## 20 **METHODS AND DESIGN**

### 21 **Population**

22  
23 This review will include studies focusing on adults aged  $\geq 18$  years, who are high users of health  
24 care services or accrue high health care costs, and whose level of depression/anxiety have been  
25 evaluated through standardised questionnaires or clinical interviews. We include studies  
26 conducted in general rather than specialist physical health services, namely primary, secondary  
27 care, and ED, across all health care systems. We will not include studies with populations seen  
28 in the context of psychiatric or mental health services for a primary diagnosis of a psychiatric  
29 condition (i.e. psychosis, schizophrenia) as the aim is to estimate the prevalence of  
30 anxiety/depression among high users of general physical health care services. We will not  
31 include specific medical specialties/illnesses associated with more frequent or costly health  
32 care use due to the nature of the condition or type of specialty (e.g. surgery, paediatrics,  
33 palliative care, obstetrics, transplant, neurodegenerative diseases, oral and maxillofacial,  
34 dentistry, nephrology, infectious diseases, virology and HIV/AIDS studies, physiotherapy, and  
35 cosmetic surgery).  
36  
37  
38  
39  
40  
41  
42  
43  
44  
45  
46  
47  
48  
49  
50  
51  
52  
53  
54  
55

56  
57 We have focused on general hospital, ED, and primary care services to ensure the review is  
58 relevant to as wide a population as possible. There is great variability in the way costs, health  
59  
60

1  
2  
3 care use, and depression/anxiety have been recorded in the literature. To add studies on  
4 individual disease conditions or specialities would considerably inflate the variability within  
5 the population of this review.  
6  
7  
8  
9

10 For studies of high-cost patients, we will include studies that have defined high cost patients  
11 as being in the top 1<sup>st</sup>, 5<sup>th</sup>, 10<sup>th</sup> and 20<sup>th</sup> percentiles of the patient population [20]. For studies  
12 involving high use of health care, we will include studies that have either used similar  
13 percentiles to describe high use (i.e. 1<sup>st</sup>, 5<sup>th</sup>, 10<sup>th</sup> or 20<sup>th</sup>) or have used a recognised definition  
14 of high or frequent use for the particular health care services. For ED, we will use the definition  
15 of 4 or more attendances per annum [29]. For primary care, we will use the definition of 10 or  
16 more attendances per year [30] or the top 10% of consulters [31].  
17  
18  
19  
20  
21  
22  
23  
24  
25  
26

27 The review will include studies reporting costs and health care use. However, resource use and  
28 costs are sensitive to variability both within and between countries, due to aspects such as local  
29 prices or aspects of service organization and delivery. This may limit the generalizability and  
30 transferability of estimates of cost and health care across settings. We will not attempt to  
31 combine costs or health use in the analyses across studies. The prevalence of depression or  
32 anxiety will be compared across studies. To determine the magnitude of health care use  
33 associated with depression/anxiety in high-use/high-cost patients, we will estimate the health  
34 care used by depressed and non-depressed individuals. If sufficient studies report similar effect  
35 measures (e.g. odds ratios, relative risk, incidence rate ratios) of the frequency of health care  
36 use in these patients [32], they will be combined in a meta-analysis, consistent with current  
37 recommendations [33–35]. Studies reporting different effect measures will not be combined,  
38 unless they can be transformed [34,35].  
39  
40  
41  
42  
43  
44  
45  
46  
47  
48  
49  
50  
51  
52  
53  
54

## 55 **Interventions**

56  
57  
58  
59  
60

1  
2  
3 We will not include randomised controlled trials, due to their selective nature. We will include  
4  
5 cohort studies of naturalistic changes in health service delivery e.g. implementation of a new  
6  
7 integrated care pathway across a geographical region, where external validity is likely to be  
8  
9 high.  
10  
11

### 12 13 **Comparators**

14  
15  
16 We will include studies where anxiety/depression is described in groups of patients considered  
17  
18 'high/frequent users' and/or 'high cost users' versus non-high cost and non-high users of  
19  
20 healthcare services. We will include studies where high health care use/costs are compared  
21  
22 between patients with anxiety/depression versus study patients without anxiety/depression.  
23  
24

### 25 26 **Outcomes**

27  
28  
29 The primary outcome is the prevalence of anxiety/depression in high/frequent and/or costly  
30  
31 users of general health care services. The secondary outcome is the magnitude of health care  
32  
33 use and costs associated with anxiety/depression. Studies including a diverse range of  
34  
35 standardised assessments and metrics for anxiety/depression will be eligible. We will extract  
36  
37 and report the prevalence of anxiety/depression based upon the type of assessments used. For  
38  
39 standardised, validated, self-report measures, this will be in the form of caseness. For clinical  
40  
41 interviews, this will be in the form of a clinical diagnosis. Studies will be excluded if they do  
42  
43 not meet our criteria for the assessment of anxiety or depression. A review concerning general  
44  
45 mental health disorders has already been undertaken by Wammes et al [20].  
46  
47  
48

### 49 50 **Study designs**

51  
52  
53 We will include retrospective and prospective cohort studies, case-control, nested case-control,  
54  
55 and cross-sectional studies. We will exclude case studies, randomised controlled trials, and  
56  
57 qualitative studies.  
58  
59  
60

## Search Strategy

We will screen the five databases that are most likely to include studies focusing on our outcomes of interest: MEDLINE, PsychINFO, EMBASE, CINAHL, PROSPERO, Cochrane Library, from inception to 1<sup>st</sup> April 2019. We will hand-search reference lists of relevant reviews/meta-analyses. For each database our search strategy has three parts (see search terms for Medline in Appendix 1). Search terms within the first part will identify studies pertaining to general health care settings of interest. The second part will focus on terms related to high cost or high/frequent use of health care services. The final part will focus the search on studies evaluating anxiety/depression. This strategy ensures we identify all studies (1) conducted across general health care settings such as primary, secondary care, and ED; (2) which include measurements of health care use and/or costs; (3) and assess anxiety/depression. We will not be able to include studies that do not quantify either health care use OR costs and studies that do not quantify anxiety/depression. This strategy ensures we include cohort studies describing the characteristics of high use and/or cost patients and case-control studies where (1) anxiety/depression is compared between high and low use and/or costs, as defined by the respective study or where (2) health care use/costs is compared between patients with high and low levels of anxiety/depression, as defined by the study.

The strategy was developed in collaboration with experts in these fields and experienced librarians at the Universities of Birmingham and Manchester, to ensure it yields appropriate studies. We will include studies in all languages; translations will be pursued either by co-authors or by international colleagues/students in the Universities of Birmingham, Leeds, and Manchester. The search will be restricted to studies with adults over the age of 18.

## Eligibility screening

1  
2  
3 Eligible studies identified in all the databases will be organised using the EndNote reference  
4 management software. Duplicates will be identified and removed before screening titles and  
5  
6  
7 abstracts.  
8  
9

### 10 11 **Study selection** 12

13  
14 Titles and abstracts will be screened independently by two reviewers. Remaining full-text  
15 articles will be further screened and evaluated for their eligibility using the adapted Hayden et  
16 al. framework [36] (Appendix 2). Any disagreement over eligibility will be resolved through  
17 discussions with a third reviewer. The inclusion criteria checklist (Table 1 and Appendix 2)  
18 ensures consistency in the review process and adherence to the Preferred Reporting Items for  
19 Systematic Reviews and Meta-Analyses (PRISMA) guidelines [37]; we will provide a  
20 PRISMA flow-chart depicting the study selection and inclusion/exclusion process.  
21  
22  
23  
24  
25  
26  
27  
28  
29  
30  
31  
32  
33  
34  
35  
36  
37  
38  
39  
40  
41  
42  
43  
44  
45  
46  
47  
48  
49  
50  
51  
52  
53  
54  
55  
56  
57  
58  
59  
60



**Table 1: Inclusion criteria checklist based on the PRISMA guidelines**

|               |                                                                                            |
|---------------|--------------------------------------------------------------------------------------------|
| Study designs | Cohort studies (Retrospective and Prospective)                                             |
|               | Case-control and nested case-control studies                                               |
|               | Cross-sectional studies                                                                    |
| Participants  | Adult aged $\geq 18$ years                                                                 |
|               | High user of health care                                                                   |
|               | Accrue high health care costs                                                              |
|               | Assessment of anxiety/depression                                                           |
| Comparators   | Non-high cost and non-high users of health care                                            |
|               | Frequent/high cost users without depression/anxiety                                        |
| Outcomes      | Prevalence of anxiety/depression in high users of health care and/or high cost patients    |
|               | Magnitude of cost or use of health care associated with the presence of anxiety/depression |

### Quality assessment

The quality of the included studies will first be ensured through the robustness of our database search and the careful title, abstract, and full-text screening of relevant studies, carried out independently by two reviewers using the forms in Appendix 2. We will only include studies reporting on high OR costly users of health care where anxiety/depression is also assessed. All full-text studies meeting the eligibility criteria will undergo a quality assessment carried out independently by two reviewers through an adapted Newcastle-Ottawa Scale [38] (NOS, Appendix 3). Assessment of study quality will include sampling method, sample size, adequacy of description of study population, attrition, method of outcome evaluation (e.g. methods for recording costs/use; type of anxiety/depression measurements, whether they are validated for

1  
2  
3 the setting, etc.), analytical method, and consideration of confounders/covariates. The adapted  
4  
5 NOS quality assessment form will first be piloted on known papers to ascertain its feasibility.  
6  
7  
8 Opinion differences will be resolved by consensus or by involving a third reviewer. Risk of  
9  
10 bias (including reporting bias) will be evaluated commensurate with recent recommendations  
11  
12 for the narrative interpretation of variation in observational studies [34,35] and the  
13  
14 recommendations of the Cochrane Collaboration [39,40]. Risk of bias will be reported in a  
15  
16 categorical format, with 'yes' indicating high risk 'no' low risk or 'unclear' for each pre-  
17  
18 defined domain. We will describe the study quality and risk of bias for each study included in  
19  
20 our review. For both low- and high-quality studies we will provide a narrative description of  
21  
22 definitions and measurements of costs and health care use, and prevalence of anxiety  
23  
24 /depression used across health care settings, regions, and patient populations. If a meta-analysis  
25  
26 can be pursued, we will run a sensitivity analysis to explore if outcomes change when removing  
27  
28 low quality studies. Through sensitivity analyses we will also specifically explore the effects  
29  
30 of excluding studies which have used non-validated measures of depression/anxiety in  
31  
32 medically ill populations.  
33  
34  
35  
36

### 37 38 **Data extraction**

39  
40  
41 Following the selection of relevant full-text articles and quality assessment, two reviewers will  
42  
43 independently extract relevant information in a data extraction form designed based on Hayden  
44  
45 et al.'s framework [36] (Appendix 2); it will be developed iteratively and first piloted on five  
46  
47 known papers, by two reviewers, before performing the data extraction for all studies.  
48  
49

50  
51 The data extraction form focuses on the study design, population, comparator, and outcome. It  
52  
53 will include: year and country of study, type of health care system, criteria used to define high  
54  
55 use or high costs, method used to record depression/anxiety (self-report measure validated or  
56  
57 non-validated, clinical interview), prevalence of depression and anxiety, health care use, costs,  
58  
59  
60

1  
2  
3 and associated ranges, the methods used to evaluate these, health care settings (e.g. primary,  
4 secondary or ED or total health care use/cost, if reported as general metrics), health care use  
5 and cost estimates for depressed/anxious patients compared with non-depressed/anxious  
6 patients, and patient characteristics (e.g. co-morbidities, whether anxiety/depression is  
7 managed). We will also record the presence and source of bias, including funding, given its  
8 potential association with reporting bias [39,40].  
9

## 16 17 **DATA ANALYSIS AND SYNTHESIS**

20  
21 The primary outcome is the prevalence of anxiety and/or depression in patients who are high  
22 and/or costly users of health care services. Prevalence rates with any dispersion metrics will be  
23 extracted or calculated from the data available. Where enough studies are available for  
24 quantitative summaries (minimum two studies [41]) we will offer weighted estimates of  
25 prevalence within relevant subgroups related to populations, comparators, study designs,  
26 measurement types, and geographical regions. Pooled prevalence estimates with 95%  
27 confidence intervals will be calculated using SPSS version 25 (IBM Corp, Armonk, NY, USA);  
28 where possible and warranted, estimate transformations and quantitative summaries will be  
29 pursued using R [33].  
30  
31  
32  
33  
34  
35  
36  
37  
38  
39  
40  
41

42 The secondary outcome is the magnitude of health care use associated with the presence of  
43 anxiety/depression. We are not attempting to pool or calculate costs or health use across  
44 studies. We will only be able to determine the magnitude of health care use associated with  
45 depression/anxiety in relation to studies that have specifically calculated or estimated these.  
46 This will be studies where high health care use/costs are compared between patients with  
47 anxiety/depression versus patients without anxiety/depression. Outcome metrics (including  
48 odds ratios, relative risk etc.) and 95% confidence intervals will be extracted from studies  
49  
50  
51  
52  
53  
54  
55  
56  
57  
58  
59  
60

1  
2  
3 presenting the number of health care contacts (e.g. ED attendances or GP contacts or number  
4  
5 of hospital admissions) by subjects with and without depression.  
6  
7

8 We expect both the prevalence of depression/anxiety to be available from studies evaluating  
9  
10 high use/cost populations alone, or in studies comparing high use/cost patients to general  
11  
12 patient populations or populations with low use/cost. Data analysis will result in quantitative  
13  
14 and narrative summaries, as appropriate, based on current recommendations for the pooling of  
15  
16 observational studies [34,35]. Whereas there is some published guidance on the number of  
17  
18 studies necessary to ensure the power of the effect size estimates when pooling interventional  
19  
20 studies [32,42], there are no similar clear, agreed guidelines on the number of studies necessary  
21  
22 for an appropriately powered meta-analysis of observational studies. We will offer a  
23  
24 quantitative summary for any number of studies ( $2 >$ ) if combining their outcomes is clinically  
25  
26 meaningful, if they report the same effect metrics, or transformations are possible [34,35,41].  
27  
28 We will comment on these pooled results in light of clinical practice and research significance  
29  
30 and potential statistical issues that may decrease the generalizability of the effect estimates (e.g.  
31  
32 high level of heterogeneity, potential sources of bias). For both outcomes, subgroups will be  
33  
34 explored quantitatively and narratively, as appropriate and depending on the type of effect  
35  
36 estimates available, based on potential differences related to: 1) country, 2) type of healthcare  
37  
38 system, 3) medical settings (e.g. primary, secondary care, ED, inpatients, outpatients, etc.), 4)  
39  
40 metrics used to evaluate health use/costs (e.g. attendances, hospital admissions, etc.). For  
41  
42 instance, we expect to find studies that may only focus on frequent attendance at ED, primary  
43  
44 care outpatient visits, number of bed days in secondary care, or more generic attendance  
45  
46 metrics across either of these health care settings. We will account for such differences in  
47  
48 reporting, but we are not planning to compare outcomes across settings, just to record and  
49  
50 estimate the magnitude of use/cost in each of these contexts.  
51  
52  
53  
54  
55  
56  
57  
58  
59  
60

1  
2  
3 We will use random-effects models to describe the prevalence of depression/anxiety high use  
4 or high cost populations. This is because it is implausible that the underlying study-specific  
5 prevalence of depression (i.e. the prevalence that would be observed were a study of infinite  
6 size) is the same for each study. Prevalence is likely to vary from study to study according to  
7 factors, both measured and unmeasured, that differ between them [43].  
8  
9

10  
11  
12 We will use the inverse variance method of DerSimonian and Laird to estimate between-study  
13 heterogeneity in underlying depression prevalence and the I-squared measure with associated  
14 95% confidence intervals, which represents the proportion of total variance attributable to this  
15 heterogeneity [39,44]. The I-squared measure gives the percentage of variability in the effect  
16 estimate that is due to heterogeneity rather than to chance. A rough guide to the interpretation  
17 of the I-squared measure suggests that I-square < 40% indicates low to no problems with  
18 heterogeneity, 30% to 60% indicates moderate problems, 60% to 90% indicates significant  
19 problems, whereas an I-squared of 75% or more suggests considerable problems[42]. If I-  
20 squared is less than 40% we will consider the estimated effect to have a low degree of  
21 heterogeneity, but this will also be interpreted in light of the magnitude, direction of the effect,  
22 and its 95% confidence interval, sources of bias, and clinical significance [35,39,41,42].  
23  
24  
25  
26  
27  
28  
29  
30  
31  
32  
33  
34  
35  
36  
37  
38  
39  
40

41 Egger's statistics with 95% confidence intervals and associated funnel plot will depict potential  
42 publication or small sample bias related to our main outcome summaries and/or within  
43 subgroups [45]. Egger's test is based on the Galbraith plot which is a plot of difference over  
44 standard error against one over standard error. Egger suggests that a regression of study  
45 difference over standard error on 1/standard error be undertaken to test the null hypothesis that  
46 the intercept is equal to zero. If Egger's test is significant ( $p < .05$ ), it means that the funnel plot  
47 is asymmetric and that smaller studies with smaller precision show larger effects sizes,  
48 suggesting bias. Sensitivity analyses will be pursued at minimum on high/low quality studies,  
49 on the use of un-validated standardised questionnaires, and use of structured clinical  
50  
51  
52  
53  
54  
55  
56  
57  
58  
59  
60

1  
2  
3 interviews. If enough studies are available, other factors that could influence our observed  
4 findings will be explored (e.g. sample size). Tabular and narrative descriptions will be offered  
5  
6 for the studies which cannot be pooled into quantitative summaries due to differing metrics.  
7  
8  
9

## 10 11 12 **PATIENT AND PUBLIC INVOLVEMENT STATEMENT**

13  
14  
15 Patients and the public were not invited to contribute to the writing or editing of this systematic  
16 review protocol. The research question was informed by the lack of prior systematic reviews  
17 or meta-analyses exploring the outcomes of interest: prevalence of anxiety/depression in  
18 high/costly health care users and the magnitude of health care use associated with  
19 anxiety/depression across adult populations in any general medical settings.  
20  
21  
22  
23  
24  
25

## 26 27 **DISCUSSION**

28  
29  
30 The purpose of this systematic review is to estimate the prevalence of anxiety/depression in  
31 people who are frequent, high cost users of general health care services, and then, if possible,  
32 to estimate the level of health care use associated with the presence of anxiety/depression.  
33 While evidence is available suggesting that a small percentage of the population accrues high  
34 percentage of healthcare/costs, it is unclear to date to what extent the costs and use may be due  
35 to the presence of common mental health problems (depression/anxiety). By examining the  
36 information available to date we aim to describe the prevalence of anxiety/depression in people  
37 who are high/costly health care users, and where possible the magnitude of use and costs  
38 associated with these two common mental health problems.  
39  
40  
41  
42  
43  
44  
45  
46  
47  
48  
49

50  
51 Our review will build upon the recent systematic review by Wammes and colleagues [20] that  
52 described the characteristics of high-cost patients and found that a high prevalence of high cost  
53 patients had associated mental health disorders. This review will specifically focus upon  
54 depression/anxiety and include both studies of cost and health care use. It will also provide  
55  
56  
57  
58  
59  
60

1  
2  
3 information about the prevalence of depression/anxiety in different health care settings,  
4 including primary care and ED. There is a trade-off between diagnostic accuracy versus size  
5 of study. Our results will complement those of Wammes and colleagues [20], and increase our  
6 understanding of the role of depression/anxiety in driving health care use and costs.  
7  
8  
9  
10  
11

12  
13 Strengths of this review are that it focuses upon common mental health problems, includes both  
14 studies of health care cost and health care use, and includes general health care settings,  
15 including primary, secondary care, and ED. Additional strengths are the inclusion of studies  
16 published in any language and the independent study identification, selection, and data  
17 extraction pursued by two independent reviewers.  
18  
19  
20  
21  
22  
23  
24

## 25 **IMPLICATIONS OF RESULTS**

26  
27  
28 The results of this systematic review will provide an estimate of the prevalence of common  
29 mental health disorders in high users of health care services, while also providing an estimate  
30 of the magnitude of use associated with depression/anxiety. It will enable treatments, such as  
31 the collaborative care model, that have already been developed for the treatment of  
32 depression/anxiety in the physically ill, to be evaluated in high-cost patients with co-morbid  
33 depression/anxiety resulting in a more personalised approach to both treatment and policy.  
34  
35  
36  
37  
38  
39  
40  
41  
42  
43  
44  
45  
46  
47  
48  
49  
50  
51  
52  
53  
54  
55  
56  
57  
58  
59  
60

## ACKNOWLEDGMENTS

The authors would like to thank Rosalind McNally (Outreach Librarian in the Research and Innovation Department & Knowledge Service in the Greater Manchester Mental Health NHS Foundation Trust) and Anita Phul (Librarian at the Barberry, National Centre for Mental Health, Birmingham and Solihull Mental Health NHS Foundation Trust, Birmingham) for their critical review of the search strategy.

For peer review only



1  
2  
3 **REFERENCES**  
4  
5

- 6 1 Porter ME. What is value in health care? *N Engl J Med* Published Online First: 2010.  
7  
8 doi:10.1056/NEJMp1011024  
9
- 10  
11 2 Davis K. 2012 Annual Report President's Message—Health Care Reform: A Journey.  
12  
13 2012. [https://www.commonwealthfund.org/publications/other-](https://www.commonwealthfund.org/publications/other-publication/2012/dec/2012-annual-report-presidents-message-health-care-reform?redirect_source=/Publications/Annual-Report-Essays/2012/Dec/Health-Care-Reform-A-Journey.aspx)  
14  
15 [publication/2012/dec/2012-annual-report-presidents-message-health-care-](https://www.commonwealthfund.org/publications/other-publication/2012/dec/2012-annual-report-presidents-message-health-care-reform?redirect_source=/Publications/Annual-Report-Essays/2012/Dec/Health-Care-Reform-A-Journey.aspx)  
16  
17 [reform?redirect\\_source=/Publications/Annual-Report-Essays/2012/Dec/Health-Care-](https://www.commonwealthfund.org/publications/other-publication/2012/dec/2012-annual-report-presidents-message-health-care-reform?redirect_source=/Publications/Annual-Report-Essays/2012/Dec/Health-Care-Reform-A-Journey.aspx)  
18  
19 [Reform-A-Journey.aspx](https://www.commonwealthfund.org/publications/other-publication/2012/dec/2012-annual-report-presidents-message-health-care-reform?redirect_source=/Publications/Annual-Report-Essays/2012/Dec/Health-Care-Reform-A-Journey.aspx) (accessed 24 Apr 2014).  
20  
21
- 22  
23 3 Rosella LC, Fitzpatrick T, Wodchis WP, *et al*. High-cost health care users in Ontario,  
24  
25 Canada: Demographic, socio-economic, and health status characteristics. *BMC Health*  
26  
27 *Serv Res* Published Online First: 2014. doi:10.1186/s12913-014-0532-2  
28  
29
- 30  
31 4 Hochman M, Asch SM. Disruptive Models in Primary Care: Caring for High-Needs,  
32  
33 High-Cost Populations. *J Gen Intern Med* Published Online First: 2017.  
34  
35 doi:10.1007/s11606-016-3945-2  
36  
37
- 38  
39 5 Zook CJ, Moore FD. High-Cost Users of Medical Care. *N Engl J Med* Published  
40  
41 Online First: 1980. doi:10.1056/NEJM198005013021804  
42  
43
- 44  
45 6 Calver J, Bramweld KJ, Preen DB, *et al*. High-cost users of hospital beds in Western  
46  
47 Australia: A population-based record linkage study. *Med J Aust* 2006.  
48
- 49  
50 7 Kimerling R, Ouimette PC, Cronkite RC, *et al*. Depression and outpatient medical  
51  
52 utilization: A naturalistic 10-year follow-up. *Ann Behav Med* Published Online First:  
53  
54 1999. doi:10.1007/BF02895964  
55
- 56  
57 8 Ruger JP, Richter CJ, Spitznagel EL, *et al*. Analysis of costs, length of stay, and  
58  
59 utilization of emergency department services by frequent users: Implications for health  
60

- 1  
2  
3 policy. *Acad Emerg Med* Published Online First: 2004. doi:10.1197/j.aem.2004.07.008  
4  
5  
6 9 Hunt KA, Weber EJ, Showstack JA, *et al.* Characteristics of Frequent Users of  
7  
8 Emergency Departments. *Ann Emerg Med* Published Online First: 2006.  
9  
10 doi:10.1016/j.annemergmed.2005.12.030  
11  
12  
13 10 LaCalle E, Rabin E. Frequent Users of Emergency Departments: The Myths, the Data,  
14  
15 and the Policy Implications. *Ann. Emerg. Med.* 2010.  
16  
17 doi:10.1016/j.annemergmed.2010.01.032  
18  
19  
20  
21 11 Smits FT, Brouwer HJ, Zwinderman AH, *et al.* Morbidity and doctor characteristics  
22  
23 only partly explain the substantial healthcare expenditures of frequent attenders: A  
24  
25 record linkage study between patient data and reimbursements data. *BMC Fam Pract*  
26  
27 Published Online First: 2013. doi:10.1186/1471-2296-14-138  
28  
29  
30  
31 12 Schoenman, JA, Chockley N. Understanding U.S. health care spending. Washington  
32  
33 (DC): 2011. [http://www.nihcm.org/](http://www.nihcm.org/images/stories/NIHCM-CostBriefEmail.pdf)  
34  
35 [images/stories/NIHCM-CostBriefEmail.pdf](http://www.nihcm.org/images/stories/NIHCM-CostBriefEmail.pdf)  
36  
37 13 Katon W, Von Korff M, Lin E, *et al.* Distressed high utilizers of medical care. DSM-  
38  
39 III-R diagnoses and treatment needs. *Gen Hosp Psychiatry* Published Online First:  
40  
41 1990. doi:10.1016/0163-8343(90)90002-T  
42  
43  
44 14 Patel S, Kai J, Atha C, *et al.* Clinical characteristics of persistent frequent attenders in  
45  
46 primary care: Case-control study. *Fam Pract* Published Online First: 2015.  
47  
48 doi:10.1093/fampra/cmz076  
49  
50  
51 15 Reid S, Crayford T, Patel A, *et al.* Frequent attenders in secondary care: A 3-year  
52  
53 follow-up study of patients with medically unexplained symptoms. *Psychol Med*  
54  
55 Published Online First: 2003. doi:10.1017/S003329170200658X  
56  
57  
58  
59 16 Von Korff M, Ormel J, Katon W, *et al.* Disability and Depression Among High  
60

- 1  
2  
3 Utilizers of Health Care: A Longitudinal Analysis. *Arch Gen Psychiatry* Published  
4  
5 Online First: 1992. doi:10.1001/archpsyc.1992.01820020011002  
6  
7
- 8 17 Arnow BA, Hunkeler EM, Blasey CM, *et al.* Comorbid depression, chronic pain, and  
9 disability in primary care. *Psychosom Med* Published Online First: 2006.  
10  
11 doi:10.1097/01.psy.0000204851.15499.fc  
12  
13  
14  
15
- 16 18 Arnow BA. Relationships between childhood maltreatment, adult health and  
17 psychiatric outcomes, and medical utilization. *J. Clin. Psychiatry.* 2004.  
18  
19 doi:10.4088/JCP.v65n0103  
20  
21  
22
- 23 19 Hensel JM, Taylor VH, Fung K, *et al.* Unique Characteristics of High-Cost Users of  
24 Medical Care With Comorbid Mental Illness or Addiction in a Population-Based  
25 Cohort. *Psychosomatics* Published Online First: 2018.  
26  
27 doi:10.1016/j.psym.2017.10.005  
28  
29  
30  
31
- 32 20 Wammes JJG, van der Wees PJ, Tanke MAC, *et al.* Systematic review of high-cost  
33 patients' characteristics and healthcare utilisation. *BMJ Open* 2018;**8**:e023113.  
34  
35 doi:10.1136/bmjopen-2018-023113  
36  
37  
38  
39  
40
- 41 21 Blumenthal, D., Anderson, G., Burke, S., Fulmer, T., Jha, A.K., Long P. Tailoring  
42 Complex-Care Management, Coordination, and Integration for High-Need, High-Cost  
43 Patients. *Vital Dir Heal Heal Care Ser* Published Online First:  
44  
45 2016.[https://nam.edu/wp-content/uploads/2016/09/Tailoring-Complex-Care-](https://nam.edu/wp-content/uploads/2016/09/Tailoring-Complex-Care-Management-Coordination-and-Integration-for-High-Need-High-Cost-Patients.pdf)  
46  
47  
48  
49  
50  
51  
52
- 53 22 Hong CS, Siegel AL, Ferris TG. Caring for high-need, high-cost patients: what makes  
54 for a successful care management program? *Commonw Fund* Published Online First:  
55  
56 2014. doi:10.1016/j.trac.2015.07.006  
57  
58  
59  
60

- 1  
2  
3 23 Brown RS, Peikes D, Peterson G, *et al.* Six features of medicare coordinated care  
4 demonstration programs that cut hospital admissions of high-risk patients. *Health Aff*  
5  
6 Published Online First: 2012. doi:10.1377/hlthaff.2012.0393  
7  
8  
9  
10  
11 24 Anderson GF, Ballreich J, Bleich S, *et al.* Attributes common to programs that  
12 successfully treat high-need, high-cost individuals. *Am J Manag Care* 2015.  
13  
14  
15  
16 25 Camacho EM, Ntais D, Coventry P, *et al.* Long-term cost-effectiveness of  
17 collaborative care (vs usual care) for people with depression and comorbid diabetes or  
18 cardiovascular disease: A Markov model informed by the COINCIDE randomised  
19 controlled trial. *BMJ Open* Published Online First: 2016. doi:10.1136/bmjopen-2016-  
20 012514  
21  
22  
23  
24  
25  
26  
27  
28 26 Coventry PA, Hudson JL, Kontopantelis E, *et al.* Characteristics of effective  
29 collaborative care for treatment of depression: A systematic review and meta-  
30 regression of 74 randomised controlled trials. *PLoS One* Published Online First: 2014.  
31 doi:10.1371/journal.pone.0108114  
32  
33  
34  
35  
36  
37  
38 27 Department of Health and Social Care. No Health Without Mental Health. 2011.  
39 [https://assets.publishing.service.gov.uk/government/uploads/system/uploads/attachmen](https://assets.publishing.service.gov.uk/government/uploads/system/uploads/attachment_data/file/138253/dh_124058.pdf)  
40 [t\\_data/file/138253/dh\\_124058.pdf](https://assets.publishing.service.gov.uk/government/uploads/system/uploads/attachment_data/file/138253/dh_124058.pdf)  
41  
42  
43  
44  
45  
46 28 Vuik SI, Mayer EK, Darzi A. Patient segmentation analysis offers significant benefits  
47 for integrated care and support. *Health Aff* Published Online First: 2016.  
48 doi:10.1377/hlthaff.2015.1311  
49  
50  
51  
52  
53 29 Locker TE, Baston S, Mason SM, *et al.* Defining frequent use of an urban emergency  
54 department. *Emerg Med J* Published Online First: 2007. doi:10.1136/emj.2006.043844  
55  
56  
57  
58 30 Vedsted P, Christensen MB. Frequent attenders in general practice care: A literature  
59  
60

- 1  
2  
3 review with special reference to methodological considerations. *Public Health*  
4  
5 Published Online First: 2005. doi:10.1016/j.puhe.2004.03.007  
6  
7  
8  
9 31 Luciano J V., Fernández A, Pinto-Meza A, *et al.* Frequent attendance in primary care:  
10  
11 Comparison and implications of different definitions. *Br J Gen Pract* Published Online  
12  
13 First: 2010. doi:10.3399/bjgp10X483139  
14  
15  
16 32 Valentine JC, Pigott TD, Rothstein HR. How Many Studies Do You Need?: A Primer  
17  
18 on Statistical Power for Meta-Analysis. *J Educ Behav Stat* Published Online First:  
19  
20 2009. doi:10.3102/1076998609346961  
21  
22  
23 33 Chang B, Hoaglin DC. Meta-analysis of odds ratios: Current good practices. *Med Care*  
24  
25 Published Online First: 2017. doi:10.1097/mlr.0000000000000696  
26  
27  
28 34 Mueller M, D'Addario M, Egger M, *et al.* Methods to systematically review and meta-  
29  
30 analyse observational studies: A systematic scoping review of recommendations. *BMC*  
31  
32 *Med. Res. Methodol.* 2018. doi:10.1186/s12874-018-0495-9  
33  
34  
35  
36 35 Dekkers OM, Vandenbroucke JP, Cevallos M, *et al.* COSMOS-E: Guidance on  
37  
38 conducting systematic reviews and meta-analyses of observational studies of etiology.  
39  
40 *PLoS Med* Published Online First: 2019. doi:10.1371/journal.pmed.1002742  
41  
42  
43  
44 36 Hayden JA, Côté P, Bombardier C. Evaluation of the quality of prognosis studies in  
45  
46 systematic reviews. *Ann Intern Med* Published Online First: 2006. doi:10.7326/0003-  
47  
48 4819-144-6-200603210-00010  
49  
50  
51 37 Moher D, Shamseer L, Clarke M, *et al.* Preferred reporting items for systematic review  
52  
53 and meta-analysis protocols (PRISMA-P) 2015 statement. *Rev Esp Nutr Humana y*  
54  
55 *Diet* Published Online First: 2016. doi:10.1186/2046-4053-4-1  
56  
57  
58  
59 38 Hartling L, Milne A, Hamm MP, *et al.* Testing the Newcastle Ottawa Scale showed  
60

- 1  
2  
3 low reliability between individual reviewers. *J Clin Epidemiol* Published Online First:  
4 2013. doi:10.1016/j.jclinepi.2013.03.003  
5  
6  
7  
8  
9 39 Higgins JP, Green S. Cochrane Handbook for Systematic Reviews of Interventions  
10 Version 5.1.0 [updated March 2011]. *Cochrane Collab* Published Online First: 2011.  
11 doi:10.1002/9780470712184.ch4  
12  
13  
14  
15  
16 40 Bero LA. Why the Cochrane Risk of Bias Tool Should Include Funding Source as a  
17 Standard Item. In: *Cochrane Database of Systematic Reviews*. 2014.  
18 doi:10.1002/14651858.ed000075  
19  
20  
21  
22  
23  
24 41 Ioannidis JPA, Patsopoulos NA, Rothstein HR. Reasons or excuses for avoiding meta-  
25 analysis in forest plots. *BMJ* Published Online First: 2008. doi:10.1136/bmj.a117  
26  
27  
28  
29 42 Higgins JP, Thompson SG, Deeks JJ AD. Measuring inconsistency in meta-analyses.  
30 *BMJ* Published Online First: 2003. doi:10.1136/bmj.327.7414.557  
31  
32  
33  
34 43 Stroup DF, Berlin JA, Morton SC, *et al*. Meta-analysis of observational studies in  
35 epidemiology: A proposal for reporting. *J Am Med Assoc* Published Online First: 2000.  
36 doi:10.1001/jama.283.15.2008  
37  
38  
39  
40  
41  
42 44 DerSimonian R, Laird N. Meta-analysis in clinical trials. *Control Clin Trials* Published  
43 Online First: 1986. doi:10.1016/0197-2456(86)90046-2  
44  
45  
46  
47 45 Egger M, Davey Smith G, Schneider M, *et al*. Bias in meta-analysis detected by a  
48 simple, graphical test. *Br Med J* Published Online First: 1997.  
49 doi:10.1136/bmj.315.7109.629  
50  
51  
52  
53  
54  
55  
56  
57  
58  
59  
60

## CONTRIBUTORS

OL and FJ developed the search strategy. OL drafted the manuscript and registered the protocol. EG and AB were involved in the design of the review and provided continuous feedback on the manuscript. OL will be first reviewer and FJ will be second reviewer. All authors read and approved the manuscript.

## COMPETING INTEREST

The authors declare that they have no competing interests.

## FUNDING

This review received no grant from any funding agency in the public, commercial or not-for-profit sectors.

## DATA SHARING AND STATEMENT

There are no unpublished data as this is a systematic review.

## PATIENT CONSENT

Patient consent is not applicable as this is a protocol for a systematic review/meta-analysis.

## ETHICS AND DISSEMINATION

As this systematic review will use data from existing studies no ethical approvals are warranted; the results will be published in a peer-reviewed publication and presented at relevant academic meetings.

1  
2  
3  
4  
5  
6  
7  
8  
9  
10  
11  
12  
13  
14  
15  
16  
17  
18  
19  
20  
21  
22  
23  
24  
25  
26  
27  
28  
29  
30  
31  
32  
33  
34  
35  
36  
37  
38  
39  
40  
41  
42  
43  
44  
45  
46  
47  
48  
49  
50  
51  
52  
53  
54  
55  
56  
57  
58  
59  
60

## Appendix 1:

### Electronic search strategy in Medline used to conduct a comprehensive literature search.

| Part 1: Setting |                                              |
|-----------------|----------------------------------------------|
| 1               | *health care/                                |
| 2               | (health adj5 care).ti,ab,de.                 |
| 3               | *health service/                             |
| 4               | (health adj5 service\$).ti,ab,de.            |
| 5               | *hospital/                                   |
| 6               | hospital\$.ti,ab,de.                         |
| 7               | *ambulatory care/                            |
| 8               | (ambulatory care adj5 facilit\$).ti,ab,de.   |
| 9               | *outpatient/                                 |
| 10              | outpatient\$.ti,ab,de.                       |
| 11              | *outpatient department/                      |
| 12              | (outpatient adj2 department).ti,ab,de.       |
| 14              | *outpatient department/                      |
| 15              | (outpatient adj2 clinic\$).ti,ab,de.         |
| 16              | primary medical care/                        |
| 17              | (primary adj2 care).ti,ab,de.                |
| 18              | *general practice/                           |
| 19              | (general adj practi\$).ti,ab,de.             |
| 20              | family practice.mp.                          |
| 21              | (family adj practi\$).ti,ab,de.              |
| 22              | gp.mp.                                       |
| 23              | gps.ti,ab,de                                 |
| 24              | family physician.mp.                         |
| 25              | family physic\$.ti,ab,de.                    |
| 26              | *emergency health service/                   |
| 27              | emergency service\$.ti,ab,de.                |
| 28              | (emergency adj2 service\$).ti,ab,de.         |
| 29              | emergency department.mp. or *emergency ward/ |
| 30              | emergency department\$.ti,ab,de.             |
| 31              | (emergency adj5 department\$).ti,ab,de.      |
| 32              | *medical service/                            |
| 33              | (medical adj5 service).ti,ab,de.             |
| 34              | exp delivery of health care/                 |
| 35              | exp health service\$/                        |
| 36              | exp ambulatory care facilities/              |
| 37              | exp ambulatory care information systems/     |
| 38              | exp primary care/                            |
| 39              | exp physicians, family/                      |
| 40              | exp primary health care/                     |



| <b>Part 2: Cost/service utilisation</b> |                                       |
|-----------------------------------------|---------------------------------------|
| 41                                      | high cost.mp.                         |
| 42                                      | high cost\$.ti,ab,de.                 |
| 43                                      | high?cost\$.ti,ab,de.                 |
| 44                                      | (high adj5 cost\$.ti,ab,de.           |
| 45                                      | frequent cost.mp.                     |
| 46                                      | frequent cost\$.ti,ab,de.             |
| 47                                      | (frequent adj5 cost\$.ti,ab,de.       |
| 48                                      | high expenditure.mp.                  |
| 49                                      | high expenditure.ti,ab,de.            |
| 50                                      | (high adj5 expenditure).ti,ab,de.     |
| 51                                      | high expense.mp.                      |
| 52                                      | high expense.ti,ab,de.                |
| 53                                      | (high adj5 expense).ti,ab,de.         |
| 54                                      | frequent user.mp.                     |
| 55                                      | frequent user.ti,ab,de.               |
| 56                                      | (frequent adj5 user).ti,ab,de.        |
| 57                                      | high user.mp.                         |
| 58                                      | high user.ti,ab,de.                   |
| 59                                      | (high adj5 user).ti,ab,de.            |
| 60                                      | high utiliser.mp.                     |
| 61                                      | high utiliser\$.ti,ab,de.             |
| 62                                      | high utilizer.mp.                     |
| 63                                      | high utilizer\$.ti,ab,de.             |
| 64                                      | (high adj5 utiliser\$.ti,ab,de.       |
| 65                                      | (high adj5 utilizer\$.ti,ab,de.       |
| 66                                      | frequent utiliser.mp.                 |
| 67                                      | frequent utilizer.mp.                 |
| 68                                      | frequent utilizer\$.ti,ab,de.         |
| 69                                      | frequent utiliser\$.ti,ab,de.         |
| 70                                      | (frequent adj5 utilizer\$.ti,ab,de.   |
| 71                                      | (frequent adj5 utiliser\$.ti,ab,de.   |
| 72                                      | high utilisation.mp.                  |
| 73                                      | high utilization.mp.                  |
| 74                                      | high utilization.ti,ab,de.            |
| 75                                      | high utilisation.ti,ab,de.            |
| 76                                      | (high adj5 utilization).ti,ab,de.     |
| 77                                      | (high adj5 utilisation).ti,ab,de.     |
| 78                                      | frequent utilisation.mp.              |
| 79                                      | frequent utilization.mp.              |
| 80                                      | frequent utilisation.ti,ab,de.        |
| 81                                      | frequent utilization.ti,ab,de.        |
| 82                                      | (frequent adj5 utilisation).ti,ab,de. |

|                                         |                                        |
|-----------------------------------------|----------------------------------------|
| 83                                      | (frequent adj5 utilization).ti,ab,de.  |
| 84                                      | high need.mp.                          |
| 85                                      | high need.ti,ab,de.                    |
| 86                                      | (high adj5 need).ti,ab,de.             |
| 87                                      | high attend.mp.                        |
| 88                                      | high attend\$.ti,ab,de.                |
| 89                                      | (high adj5 attend\$).ti,ab,de.         |
| 90                                      | superutilizer.mp.                      |
| 91                                      | superutilizer.ti,ab,de.                |
| 92                                      | exp health expenditures/               |
| 93                                      | exp patient acceptance of health care/ |
| 94                                      | exp health care costs/                 |
| 95                                      | exp health services accessibility/     |
| 96                                      | exp cost benefit analysis/             |
| 97                                      | exp practice patterns physicians/      |
| 98                                      | exp efficiency organizational/         |
| 99                                      | exp health services misuse/            |
| 100                                     | exp patient care team/                 |
| 101                                     | exp case management/                   |
| 102                                     | exp office visits/                     |
| 103                                     | exp referral/                          |
| <b>Part 3: Anxiety/Depression terms</b> |                                        |
| 104                                     | exp anxiety/                           |
| 105                                     | (anxiety adj5 disorder\$.tw            |
| 106                                     | exp panic disorder/                    |
| 107                                     | (panic adj5 disorder\$.tw              |
| 108                                     | panic.tw                               |
| 109                                     | (panic adj5 attack\$.tw                |
| 110                                     | fear.tw                                |
| 111                                     | exp depression/                        |
| 112                                     | (depressive adj5 disorder\$.tw         |

## Appendix 2 - Data extraction form adapted from the framework of Hayden et al.

### Eligibility criteria for the title and abstract screening phase

#### Inclusion criteria

| Study design                                                                                                                                                                                                                                                                                                                                                                                                                                            | Assessment                    | Comment |
|---------------------------------------------------------------------------------------------------------------------------------------------------------------------------------------------------------------------------------------------------------------------------------------------------------------------------------------------------------------------------------------------------------------------------------------------------------|-------------------------------|---------|
| Is it:<br>[1] A cohort study (prospective or retrospective)<br>[2] A case-control or nested case-control<br>[3] A cross-sectional study                                                                                                                                                                                                                                                                                                                 | Yes<br>No<br>Unclear          |         |
| <b>Population</b>                                                                                                                                                                                                                                                                                                                                                                                                                                       |                               |         |
| [1] Adults aged $\geq 18$ years<br>[2] Patients are high users of health care<br>[2] Patients accrue high health care costs<br>Including: high cost patients, high users, distressed high users/utilisers of care, frequent attenders in primary care, secondary care, frequent attenders at an emergency department<br><br><b>NB:</b> Please answer YES if patients with anxiety/depression are a subgroup; please answer YES if mixed age population. | Yes<br>No<br>Unclear          |         |
| <b>Comparators</b>                                                                                                                                                                                                                                                                                                                                                                                                                                      |                               |         |
| [1] Comparison group includes non-high use OR non-high cost patients<br>[2] Comparison group includes frequent/high users without anxiety/depression                                                                                                                                                                                                                                                                                                    | Yes<br>No<br>Unclear          |         |
| <b>Outcome</b>                                                                                                                                                                                                                                                                                                                                                                                                                                          |                               |         |
| Did the study report any of the following outcomes:<br>[1] Prevalence of anxiety/depression in high users/high cost patients<br>[2] Odds Ratio of use of care between depressed/anxious vs non-depressed/anxious participants                                                                                                                                                                                                                           | Yes<br>No<br>Unclear          |         |
| <b>Final decision (please tick)</b>                                                                                                                                                                                                                                                                                                                                                                                                                     | Include<br>Exclude<br>Unclear |         |

#### Exclusion criteria

| Reasons for exclusion of study from review (please circle where appropriate) |                                                                                                                                                                                                                                                                                                                                                         |
|------------------------------------------------------------------------------|---------------------------------------------------------------------------------------------------------------------------------------------------------------------------------------------------------------------------------------------------------------------------------------------------------------------------------------------------------|
| Study design                                                                 | [1] Clinical trial<br>[2] Case study<br>[3] Qualitative study                                                                                                                                                                                                                                                                                           |
| Population                                                                   | Age: <18<br>All specific medical specialties/illnesses including:<br>[1] Paediatric patients<br>[2] Palliative care<br>[3] Obstetrics<br>[4] Transplant<br>[5] Neurodegenerative disease<br>[6] Oral, maxillofacial, dentistry<br>[7] Nephrology<br>[8] Infectious diseases<br>[9] Virology and HIV/AIDS<br>[10] Physiotherapy<br>[11] Cosmetic surgery |

|              |                                                                                                                                              |
|--------------|----------------------------------------------------------------------------------------------------------------------------------------------|
|              | [12] Psychiatry/mental health services<br>[13] Specific diseases e.g. diabetes, cardiovascular                                               |
| Intervention | [1] Randomised clinical trial<br>[2] Interventions in populations who are not high use/cost<br>[3] Screening/diagnosis/treatment evaluations |
| Comparator   | Studies without non-high cost/non-high users of health care                                                                                  |
| Outcomes     | Relevant outcomes not assessed:<br>[1] No anxiety/depression assessment<br>[2] No assessment of health use OR cost                           |
| Other        | Duplicate publication<br>Other (explain)                                                                                                     |

| <b>Eligibility criteria for Full Text</b>                                                                                    |                      |
|------------------------------------------------------------------------------------------------------------------------------|----------------------|
| Satisfaction of eligibility criteria above                                                                                   | Yes<br>No<br>Unclear |
| Cost studies will include patients either in the top 1%, 5% 10% and 20% of most costly patients.                             | Yes<br>No<br>Unclear |
| Studies of general health care use will include patients in the top 1%, 5%, 10% or 20% of health care use.                   | Yes<br>No<br>Unclear |
| Studies in primary care will either include patients with 10 or more visits per year or those patients in the top 10% of use | Yes<br>No<br>Unclear |
| Studies of ED will include patients with at least 4 visits per annum.                                                        | Yes<br>No<br>Unclear |

### Organisation

| Organisational aspect | Exclude                                                                                                                       | Include |
|-----------------------|-------------------------------------------------------------------------------------------------------------------------------|---------|
| <b>Reviewer/date:</b> | <b>Checked by:</b>                                                                                                            |         |
| Author/Year           |                                                                                                                               |         |
| Journal/Source        |                                                                                                                               |         |
| Country of origin     |                                                                                                                               |         |
| Publication type      | Full text/Abstract/Book chapter/progress report/<br>Other – please specify                                                    |         |
| Fate                  | Decision: pending/Checked reference/Use for discussion/Exclude without listing/Exclude with listing<br>Other – please specify |         |
| Notes                 |                                                                                                                               |         |

## Data extraction template for full-text articles

| General study characteristics                                                                                                         |                                                                                                                                                                                                                                                                                                                                                                                                                                                                                                                                                                                                                                                                                                                                                                                                                                                                                                                                                                        |
|---------------------------------------------------------------------------------------------------------------------------------------|------------------------------------------------------------------------------------------------------------------------------------------------------------------------------------------------------------------------------------------------------------------------------------------------------------------------------------------------------------------------------------------------------------------------------------------------------------------------------------------------------------------------------------------------------------------------------------------------------------------------------------------------------------------------------------------------------------------------------------------------------------------------------------------------------------------------------------------------------------------------------------------------------------------------------------------------------------------------|
| Location of study<br>Please specify country, type of health care system, health care setting (primary/secondary care/ED/all settings) |                                                                                                                                                                                                                                                                                                                                                                                                                                                                                                                                                                                                                                                                                                                                                                                                                                                                                                                                                                        |
| Study aims                                                                                                                            | Reported/Not reported                                                                                                                                                                                                                                                                                                                                                                                                                                                                                                                                                                                                                                                                                                                                                                                                                                                                                                                                                  |
| Date of recruitment                                                                                                                   | From _____ to _____<br>Median (range):#<br>Mean:#                                                                                                                                                                                                                                                                                                                                                                                                                                                                                                                                                                                                                                                                                                                                                                                                                                                                                                                      |
| Length of follow-up of outcome of interest + length of follow-up of study                                                             | From _____ to _____<br>Median (range):#<br>Mean (standard deviation):#                                                                                                                                                                                                                                                                                                                                                                                                                                                                                                                                                                                                                                                                                                                                                                                                                                                                                                 |
| Outcome definition                                                                                                                    | [1] Anxiety or depression or both<br>Median (range):#<br>Mean (standard deviation):#<br>[2] Health care use<br>Median (range):#<br>Mean (standard deviation):#<br>[3] Health care cost<br>Median (range):#<br>Mean (standard deviation):#                                                                                                                                                                                                                                                                                                                                                                                                                                                                                                                                                                                                                                                                                                                              |
| Outcome measurement                                                                                                                   | Did the study report measurements for any of the following outcomes:<br>[1] Prevalence of anxiety/depression <ul style="list-style-type: none"> <li>➤ Specify measures of central tendency and variation)</li> <li>➤ Specify instrument and range (e.g. PHQ-9, GAD-7, SCID, etc.)</li> <li>➤ Is it self-report?</li> <li>➤ Is it standardised?</li> <li>➤ Is it validated to context?</li> <li>➤ Is it a standardised clinical interview</li> <li>➤ Is it a clinical interview with diagnosis according to recognised diagnostic system</li> </ul> [2] Magnitude of cost or use of health care associated with the presence of anxiety/depression. Consider: <ul style="list-style-type: none"> <li>➤ Frequency and range of scheduled contacts in primary care, secondary care or ED</li> <li>➤ Cost, range, of contacts in above settings</li> <li>➤ Frequency and range of inpatient admissions</li> <li>➤ Cost, range, currency of inpatient admissions</li> </ul> |
| Covariates/Confounders considered (please detail)                                                                                     | [1] Did the study report measurements used to report: <ul style="list-style-type: none"> <li>➤ Patient characteristics and contexts associated with high service use/costs among patients with anxiety depression?</li> </ul> <i>Please consider patient demographic (e.g. age, ethnicity, gender, homelessness) and clinical factors (e.g. anxiety/depression management, physical co-morbidities)</i>                                                                                                                                                                                                                                                                                                                                                                                                                                                                                                                                                                |
| Relationship between outcome and relevant covariates/confounders                                                                      | Is the relationship statistically significant?<br>Yes/No<br><i>If Yes:</i><br>OR/mean difference (95% confidence intervals):#<br><br><i>If No, offer reason:</i><br>Low powered or inconclusive study<br>A true negative study                                                                                                                                                                                                                                                                                                                                                                                                                                                                                                                                                                                                                                                                                                                                         |

|                                |                                                                                     |
|--------------------------------|-------------------------------------------------------------------------------------|
|                                | Other reasons (please specify)                                                      |
| Power calculation              | Yes/No/Not reported<br><br>Calculated sample size:#<br>Sample size achieved: Yes/No |
| Funding                        | Unclear<br>Not reported<br>Please state where reported                              |
| Conflict of interest statement | Yes/No/Not reported                                                                 |

| Observational study characteristics |                                                                                                                   |
|-------------------------------------|-------------------------------------------------------------------------------------------------------------------|
| Sample size                         |                                                                                                                   |
| Number of excluded patients         |                                                                                                                   |
| Recruitment method                  |                                                                                                                   |
| Type of observational study         | Cohort studies (prospective/retrospective)<br>Case-control studies/nested case-control<br>Cross-sectional studies |
| Are groups comparable               | Yes/No<br><br>If No, please specify                                                                               |
| Any confounders considered?         | Yes/No<br>If Yes, specify which<br><br>If No, please specify                                                      |
| Analyses                            |                                                                                                                   |
| Drop-outs stated                    | Yes/No<br><br>If Yes: number in each group                                                                        |

| Patient characteristics                                                                                                                                          |                               |                        |          |
|------------------------------------------------------------------------------------------------------------------------------------------------------------------|-------------------------------|------------------------|----------|
| Notes: Any relationship with outcomes?<br>Yes/No/Not reported<br><br><i>If Yes, please state statistical parameters and significance level where appropriate</i> | Exposure (i.e. High use/cost) | Control (Low use/cost) | Comments |
| Number of patients                                                                                                                                               |                               |                        |          |
| Country                                                                                                                                                          |                               |                        |          |
| Age mean/median (standard deviation/range)                                                                                                                       |                               |                        |          |
| Ethnicity (Number, %)                                                                                                                                            |                               |                        |          |
| Sex (Number, %)                                                                                                                                                  | Male:<br>Female:              | Male:<br>Female:       |          |
| Homelessness specified in study?<br>Yes/No                                                                                                                       |                               |                        |          |
| No of patients recruited                                                                                                                                         |                               |                        |          |
| No of patients allocated                                                                                                                                         |                               |                        |          |
| No of patients evaluated                                                                                                                                         |                               |                        |          |
| No of drop-outs                                                                                                                                                  |                               |                        |          |
| Reasons for drop-out                                                                                                                                             |                               |                        |          |
| Definition of anxiety/depression in the groups:                                                                                                                  |                               |                        |          |

|                                                                                                                                                                                                                                  |  |  |  |
|----------------------------------------------------------------------------------------------------------------------------------------------------------------------------------------------------------------------------------|--|--|--|
| [1] Via standardised questionnaire (validated or not) semi-structured or clinical interview?<br><i>Please specify</i><br>[2] Definition of high/low ranges or diagnosis (yes/no)<br>[3] Is anxiety/depression managed?<br>Yes/No |  |  |  |
| Clinical status at recruitment :<br>[1] Comorbidities<br>Yes/No<br><i>If yes, please state</i><br>Number:                                                                                                                        |  |  |  |
| Adverse event?<br>Yes/No<br><br><i>If Yes, please detail</i>                                                                                                                                                                     |  |  |  |

**Outcome details**

*The following table can be copied for every relevant outcome assessed (please fill out fields only where applicable)*

| Outcome assessed                                                                                                                                         |  |
|----------------------------------------------------------------------------------------------------------------------------------------------------------|--|
| Definition of each outcome                                                                                                                               |  |
| Time of assessment of each outcome                                                                                                                       |  |
| Timing of assessment                                                                                                                                     |  |
| Length of follow up for each outcome                                                                                                                     |  |
| Method of measurement                                                                                                                                    |  |
| No of patients evaluated for each outcome, as stated above                                                                                               |  |
| Confounding variables were considered (e.g. age, gender, ethnicity, homelessness, physical co-morbidities, managed depression)<br><i>Please list all</i> |  |
| How were the confounding variables controlled?                                                                                                           |  |

| Methodological quality summary                                                                                                      |     |  |        |  |    |  |        |  |          |  |
|-------------------------------------------------------------------------------------------------------------------------------------|-----|--|--------|--|----|--|--------|--|----------|--|
| Reviewer/Date:                                                                                                                      | Yes |  | Partly |  | No |  | Unsure |  | Comments |  |
| Contents (please refer to tables below for guidance)                                                                                |     |  |        |  |    |  |        |  |          |  |
| Study participation                                                                                                                 |     |  |        |  |    |  |        |  |          |  |
| Study attrition                                                                                                                     |     |  |        |  |    |  |        |  |          |  |
| Measurement of outcome                                                                                                              |     |  |        |  |    |  |        |  |          |  |
| Analytical approach                                                                                                                 |     |  |        |  |    |  |        |  |          |  |
| Specify confounding variables measurements (e.g. age, gender, ethnicity, homelessness, physical co-morbidities, managed depression) |     |  |        |  |    |  |        |  |          |  |

1  
2  
3  
4  
5  
6  
7  
8  
9  
10  
11  
12  
13  
14  
15  
16  
17  
18  
19  
20  
21  
22  
23  
24  
25  
26  
27  
28  
29  
30  
31  
32  
33  
34  
35  
36  
37  
38  
39  
40  
41  
42  
43  
44  
45  
46  
47  
48  
49  
50  
51  
52  
53  
54  
55  
56  
57  
58  
59  
60

|                                                         |                  |  |                       |  |                   |
|---------------------------------------------------------|------------------|--|-----------------------|--|-------------------|
| Specify method of controlling for confounding variables |                  |  |                       |  |                   |
| Summary                                                 | Low risk of bias |  | Moderate risk of bias |  | High risk of bias |
| Remarks:                                                |                  |  |                       |  |                   |

For peer review only



### Appendix 3

#### Quality assessment form adapted from the Ottawa-Newcastle scale (NOS) for assessing non-randomised studies

|                                                 |                                                                                                                                                                                                                                                                                                                                                                                                                                                                                                                                                                                                                                                                                                                                                                                                                                                                                                                                                      | Yes/No/Unclear |
|-------------------------------------------------|------------------------------------------------------------------------------------------------------------------------------------------------------------------------------------------------------------------------------------------------------------------------------------------------------------------------------------------------------------------------------------------------------------------------------------------------------------------------------------------------------------------------------------------------------------------------------------------------------------------------------------------------------------------------------------------------------------------------------------------------------------------------------------------------------------------------------------------------------------------------------------------------------------------------------------------------------|----------------|
| Selection of participants                       | [1] Was the inclusion/exclusion clearly described? (for example, age, diagnosis status, anxiety/depression)<br>[2] Was inclusion/exclusion assessed using valid and reliable measures? (for example, clinical interview to ascertain anxiety/depression or standardised questionnaires)<br>[3] Was recruitment strategy clearly described?<br>[4] Did the investigators ensure that the exposed/unexposed group were comparable (for example did they use stratification or matching)                                                                                                                                                                                                                                                                                                                                                                                                                                                                |                |
| Adequate description of study population        | [1] Was study population well characterised? <ul style="list-style-type: none"> <li>➤ Age</li> <li>➤ Sex</li> <li>➤ Ethnicity</li> <li>➤ Homelessness (yes/no)</li> <li>➤ Suitable definition of anxiety/depression</li> </ul>                                                                                                                                                                                                                                                                                                                                                                                                                                                                                                                                                                                                                                                                                                                       |                |
| Valid method for evaluating outcome             | [1] Was there a definition provided for the key outcomes: <ul style="list-style-type: none"> <li>➤ Anxiety/depression caseness or diagnosis</li> <li>➤ Health care use level and range</li> <li>➤ Health care costs and range</li> </ul> [2] Was there a method used to ascertain anxiety/depression clearly defined? <ul style="list-style-type: none"> <li>➤ Standardised questionnaires validated to the setting</li> <li>➤ Standardised questionnaire not validated for the setting</li> <li>➤ Clinical interview based on the ICD or DSM (version specified)</li> <li>➤ Semi-structured research interview based on ICD or DSM version specified</li> </ul> [3] Was a valid and reliable measure used to report outcomes? For example <ul style="list-style-type: none"> <li>➤ Frequency/range of health care use</li> <li>➤ Mean/variation/currency of health care cost</li> <li>➤ Clinical interview/Questionnaire score/variation</li> </ul> |                |
| Adequate follow-up period<br>(where applicable) | [1] Was follow-up adequate enough for the outcome to occur?<br>[2] Was follow-up period the same across groups?<br>[3] Were differences in follow-up adjusted for using statistical techniques?                                                                                                                                                                                                                                                                                                                                                                                                                                                                                                                                                                                                                                                                                                                                                      |                |
| Completeness of follow-up<br>(where applicable) | [1] Were drop-out rates and reasons for drop-out similar across exposed and unexposed?<br>[2] Were numbers of drop-outs/withdrawals documented at each time point?                                                                                                                                                                                                                                                                                                                                                                                                                                                                                                                                                                                                                                                                                                                                                                                   |                |
| Analysis and control of confounders             | [1] Does the study identify any confounders?<br>[2] Does the study control for these confounders?                                                                                                                                                                                                                                                                                                                                                                                                                                                                                                                                                                                                                                                                                                                                                                                                                                                    |                |
| Sample size calculation                         | [1] Is the sample size adequate?<br>[2] Did the study describe how the sample size was calculated?<br>[3] Was the sample size large enough to detect differences in events between groups? (i.e. mean change)                                                                                                                                                                                                                                                                                                                                                                                                                                                                                                                                                                                                                                                                                                                                        |                |
| Analytical methods appropriate                  | [1] Was the type of analysis appropriate for the type of outcome data? For example:                                                                                                                                                                                                                                                                                                                                                                                                                                                                                                                                                                                                                                                                                                                                                                                                                                                                  |                |

1  
2  
3  
4  
5  
6  
7  
8  
9  
10  
11  
12  
13  
14  
15  
16  
17  
18  
19  
20  
21  
22  
23  
24  
25  
26  
27  
28  
29  
30  
31  
32  
33  
34  
35  
36  
37  
38  
39  
40  
41  
42  
43  
44  
45  
46  
47  
48  
49  
50  
51  
52  
53  
54  
55  
56  
57  
58  
59  
60

|  |                                                                                                                                                                                                                                                                                               |  |
|--|-----------------------------------------------------------------------------------------------------------------------------------------------------------------------------------------------------------------------------------------------------------------------------------------------|--|
|  | <ul style="list-style-type: none"><li>➤ Continuous – Mixed model, ANCOVA</li><li>➤ Categorical - Mixed model for categorical outcome</li><li>➤ Dichotomous – Logistic regression</li></ul> <p>[2] Was loss to follow-up accounted for in the analysis (e.g. through sensitivity analysis)</p> |  |
|--|-----------------------------------------------------------------------------------------------------------------------------------------------------------------------------------------------------------------------------------------------------------------------------------------------|--|

For peer review only

## Abbreviations

PROSPERO: Prospective Registering of Systematic Reviews; CINAHL: Cumulative Index for Nursing and Allied Health Literature; NHS: National Health Service; GP: General Practitioner; ED: Emergency Department; ANCOVA: Analysis of Covariance; PRISMA: Preferred Reporting Items for Systematic Reviews and Meta-Analysis; NOS: The Newcastle – Ottawa Scale; PHQ-9: Patient Health Questionnaire-9; GAD-7: Generalised Anxiety Disorder Assessment-7; SCID: Structured Clinical Interview for DSM; ICD: International Classification of Diseases; DSM: Diagnostic and Statistical Manual of Mental Disorders.

# Reporting checklist for protocol of a systematic review.

Based on the PRISMA-P guidelines.

## Instructions to authors

Complete this checklist by entering the page numbers from your manuscript where readers will find each of the items listed below.

Your article may not currently address all the items on the checklist. Please modify your text to include the missing information. If you are certain that an item does not apply, please write "n/a" and provide a short explanation.

Upload your completed checklist as an extra file when you submit to a journal.

In your methods section, say that you used the PRISMA-P reporting guidelines, and cite them as:

Moher D, Shamseer L, Clarke M, Ghersi D, Liberati A, Petticrew M, Shekelle P, Stewart LA. Preferred Reporting Items for Systematic Review and Meta-Analysis Protocols (PRISMA-P) 2015 statement. *Syst Rev.* 2015;4(1):1.

|                |                     | Reporting Item                                                                                                                                                              | Page Number |
|----------------|---------------------|-----------------------------------------------------------------------------------------------------------------------------------------------------------------------------|-------------|
| Identification | <a href="#">#1a</a> | Identify the report as a protocol of a systematic review                                                                                                                    | 3           |
| Update         | <a href="#">#1b</a> | If the protocol is for an update of a previous systematic review, identify as such                                                                                          | N/A         |
|                | <a href="#">#2</a>  | If registered, provide the name of the registry (such as PROSPERO) and registration number                                                                                  | 3           |
| Contact        | <a href="#">#3a</a> | Provide name, institutional affiliation, e-mail address of all protocol authors; provide physical mailing address of corresponding author                                   | 1           |
| Contribution   | <a href="#">#3b</a> | Describe contributions of protocol authors and identify the guarantor of the review                                                                                         | 18          |
|                | <a href="#">#4</a>  | If the protocol represents an amendment of a previously completed or published protocol, identify as such and list changes; otherwise, state plan for documenting important | N/A         |

|                                         |                      |                                                                                                                                                                                                                               |            |
|-----------------------------------------|----------------------|-------------------------------------------------------------------------------------------------------------------------------------------------------------------------------------------------------------------------------|------------|
|                                         |                      | protocol amendments                                                                                                                                                                                                           |            |
| Sources                                 | <a href="#">#5a</a>  | Indicate sources of financial or other support for the review                                                                                                                                                                 | 19         |
| Sponsor                                 | <a href="#">#5b</a>  | Provide name for the review funder and / or sponsor                                                                                                                                                                           | N/A        |
| Role of sponsor or funder               | <a href="#">#5c</a>  | Describe roles of funder(s), sponsor(s), and / or institution(s), if any, in developing the protocol                                                                                                                          | N/A        |
| Rationale                               | <a href="#">#6</a>   | Describe the rationale for the review in the context of what is already known                                                                                                                                                 | 5          |
| Objectives                              | <a href="#">#7</a>   | Provide an explicit statement of the question(s) the review will address with reference to participants, interventions, comparators, and outcomes (PICO)                                                                      | 5          |
| Eligibility criteria                    | <a href="#">#8</a>   | Specify the study characteristics (such as PICO, study design, setting, time frame) and report characteristics (such as years considered, language, publication status) to be used as criteria for eligibility for the review | 6-7        |
| Information sources                     | <a href="#">#9</a>   | Describe all intended information sources (such as electronic databases, contact with study authors, trial registers or other grey literature sources) with planned dates of coverage                                         | 7          |
| Search strategy                         | <a href="#">#10</a>  | Present draft of search strategy to be used for at least one electronic database, including planned limits, such that it could be repeated                                                                                    | Appendix 1 |
| Study records - data management         | <a href="#">#11a</a> | Describe the mechanism(s) that will be used to manage records and data throughout the review                                                                                                                                  | 7          |
| Study records - selection process       | <a href="#">#11b</a> | State the process that will be used for selecting studies (such as two independent reviewers) through each phase of the review (that is, screening, eligibility and inclusion in meta-analysis)                               | 9          |
| Study records - data collection process | <a href="#">#11c</a> | Describe planned method of extracting data from reports (such as piloting forms, done independently, in duplicate), any processes for obtaining and confirming data from investigators                                        | 9          |
| Data items                              | <a href="#">#12</a>  | List and define all variables for which data will be sought (such as PICO items, funding sources), any pre-planned data assumptions and simplifications                                                                       | 6-7        |

|                                    |                                    |                      |                                                                                                                                                                                                                                                           |   |
|------------------------------------|------------------------------------|----------------------|-----------------------------------------------------------------------------------------------------------------------------------------------------------------------------------------------------------------------------------------------------------|---|
| 1<br>2<br>3<br>4<br>5              | Outcomes and prioritization        | <a href="#">#13</a>  | List and define all outcomes for which data will be sought, including prioritization of main and additional outcomes, with rationale                                                                                                                      | 7 |
| 6<br>7<br>8<br>9<br>10<br>11<br>12 | Risk of bias in individual studies | <a href="#">#14</a>  | Describe anticipated methods for assessing risk of bias of individual studies, including whether this will be done at the outcome or study level, or both; state how this information will be used in data synthesis                                      | 8 |
| 13<br>14<br>15<br>16               | Data synthesis                     | <a href="#">#15a</a> | Describe criteria under which study data will be quantitatively synthesised                                                                                                                                                                               | 9 |
| 17<br>18<br>19<br>20<br>21<br>22   |                                    | <a href="#">#15b</a> | If data are appropriate for quantitative synthesis, describe planned summary measures, methods of handling data and methods of combining data from studies, including any planned exploration of consistency (such as I <sup>2</sup> , Kendall's $\tau$ ) | 9 |
| 23<br>24<br>25<br>26               |                                    | <a href="#">#15c</a> | Describe any proposed additional analyses (such as sensitivity or subgroup analyses, meta-regression)                                                                                                                                                     | 9 |
| 27<br>28<br>29<br>30               |                                    | <a href="#">#15d</a> | If quantitative synthesis is not appropriate, describe the type of summary planned                                                                                                                                                                        | 9 |
| 31<br>32<br>33<br>34<br>35         | Meta-bias(es)                      | <a href="#">#16</a>  | Specify any planned assessment of meta-bias(es) (such as publication bias across studies, selective reporting within studies)                                                                                                                             | 9 |
| 36<br>37<br>38<br>39<br>40<br>41   | Confidence in cumulative evidence  | <a href="#">#17</a>  | Describe how the strength of the body of evidence will be assessed (such as GRADE)                                                                                                                                                                        | 9 |

The PRISMA-P checklist is distributed under the terms of the Creative Commons Attribution License CC-BY 4.0. This checklist can be completed online using <https://www.goodreports.org/>, a tool made by the [EQUATOR Network](#) in collaboration with [Penelope.ai](#)
