# Supplementary material for: Prevalence of common mental health disorders in adults who are high or costly users of healthcare services: protocol for a systematic review and meta-analysis
Source: PubMed Central journal article supplement — BMJ Open. 2019 Sep 4;9(9):e028295. doi: 10.1136/bmjopen-2018-028295 (PMC6731873; doi:10.1136/bmjopen-2018-028295), 2019-09-04
Supplement: bmjopen-2018-028295supp001.pdf [file bmjopen-2018-028295supp001.pdf]

**Appendix 1:****Electronic search strategy in Medline used to conduct a comprehensive literature search.**

| <b>Part 1: Setting</b> |                                              |
|------------------------|----------------------------------------------|
| 1                      | *health care/                                |
| 2                      | (health adj5 care).ti,ab,de.                 |
| 3                      | *health service/                             |
| 4                      | (health adj5 service\$).ti,ab,de.            |
| 5                      | *hospital/                                   |
| 6                      | hospital\$.ti,ab,de.                         |
| 7                      | *ambulatory care/                            |
| 8                      | (ambulatory care adj5 facilit\$).ti,ab,de.   |
| 9                      | *outpatient/                                 |
| 10                     | outpatient\$.ti,ab,de.                       |
| 11                     | *outpatient department/                      |
| 12                     | (outpatient adj2 department).ti,ab,de.       |
| 14                     | *outpatient department/                      |
| 15                     | (outpatient adj2 clinic\$).ti,ab,de.         |
| 16                     | primary medical care/                        |
| 17                     | (primary adj2 care).ti,ab,de.                |
| 18                     | *general practice/                           |
| 19                     | (general adj practi\$).ti,ab,de.             |
| 20                     | family practice.mp.                          |
| 21                     | (family adj practi\$).ti,ab,de.              |
| 22                     | gp.mp.                                       |
| 23                     | gps.ti,ab,de                                 |
| 24                     | family physician.mp.                         |
| 25                     | family physic\$.ti,ab,de.                    |
| 26                     | *emergency health service/                   |
| 27                     | emergency service\$.ti,ab,de.                |
| 28                     | (emergency adj2 service\$).ti,ab,de.         |
| 29                     | emergency department.mp. or *emergency ward/ |
| 30                     | emergency department\$.ti,ab,de.             |
| 31                     | (emergency adj5 department\$).ti,ab,de.      |
| 32                     | *medical service/                            |
| 33                     | (medical adj5 service).ti,ab,de.             |
| 34                     | exp delivery of health care/                 |
| 35                     | exp health service\$/                        |
| 36                     | exp ambulatory care facilities/              |
| 37                     | exp ambulatory care information systems/     |
| 38                     | exp primary care/                            |
| 39                     | exp physicians, family/                      |
| 40                     | exp primary health care/                     |

| <b>Part 2: Cost/service utilisation</b> |                                       |
|-----------------------------------------|---------------------------------------|
| 41                                      | high cost.mp.                         |
| 42                                      | high cost\$.ti,ab,de.                 |
| 43                                      | high?cost\$.ti,ab,de.                 |
| 44                                      | (high adj5 cost\$.ti,ab,de.           |
| 45                                      | frequent cost.mp.                     |
| 46                                      | frequent cost\$.ti,ab,de.             |
| 47                                      | (frequent adj5 cost\$.ti,ab,de.       |
| 48                                      | high expenditure.mp.                  |
| 49                                      | high expenditure.ti,ab,de.            |
| 50                                      | (high adj5 expenditure).ti,ab,de.     |
| 51                                      | high expense.mp.                      |
| 52                                      | high expense.ti,ab,de.                |
| 53                                      | (high adj5 expense).ti,ab,de.         |
| 54                                      | frequent user.mp.                     |
| 55                                      | frequent user.ti,ab,de.               |
| 56                                      | (frequent adj5 user).ti,ab,de.        |
| 57                                      | high user.mp.                         |
| 58                                      | high user.ti,ab,de.                   |
| 59                                      | (high adj5 user).ti,ab,de.            |
| 60                                      | high utiliser.mp.                     |
| 61                                      | high utiliser\$.ti,ab,de.             |
| 62                                      | high utilizer.mp.                     |
| 63                                      | high utilizer\$.ti,ab,de.             |
| 64                                      | (high adj5 utiliser\$.ti,ab,de.       |
| 65                                      | (high adj5 utilizer\$.ti,ab,de.       |
| 66                                      | frequent utiliser.mp.                 |
| 67                                      | frequent utilizer.mp.                 |
| 68                                      | frequent utilizer\$.ti,ab,de.         |
| 69                                      | frequent utiliser\$.ti,ab,de.         |
| 70                                      | (frequent adj5 utilizer\$.ti,ab,de.   |
| 71                                      | (frequent adj5 utiliser\$.ti,ab,de.   |
| 72                                      | high utilisation.mp.                  |
| 73                                      | high utilization.mp.                  |
| 74                                      | high utilization.ti,ab,de.            |
| 75                                      | high utilisation.ti,ab,de.            |
| 76                                      | (high adj5 utilization).ti,ab,de.     |
| 77                                      | (high adj5 utilisation).ti,ab,de.     |
| 78                                      | frequent utilisation.mp.              |
| 79                                      | frequent utilization.mp.              |
| 80                                      | frequent utilisation.ti,ab,de.        |
| 81                                      | frequent utilization.ti,ab,de.        |
| 82                                      | (frequent adj5 utilisation).ti,ab,de. |

|                                         |                                        |
|-----------------------------------------|----------------------------------------|
| 83                                      | (frequent adj5 utilization).ti,ab,de.  |
| 84                                      | high need.mp.                          |
| 85                                      | high need.ti,ab,de.                    |
| 86                                      | (high adj5 need).ti,ab,de.             |
| 87                                      | high attend.mp.                        |
| 88                                      | high attend\$.ti,ab,de.                |
| 89                                      | (high adj5 attend\$).ti,ab,de.         |
| 90                                      | superutilizer.mp.                      |
| 91                                      | superutilizer.ti,ab,de.                |
| 92                                      | exp health expenditures/               |
| 93                                      | exp patient acceptance of health care/ |
| 94                                      | exp health care costs/                 |
| 95                                      | exp health services accessibility/     |
| 96                                      | exp cost benefit analysis/             |
| 97                                      | exp practice patterns physicians/      |
| 98                                      | exp efficiency organizational/         |
| 99                                      | exp health services misuse/            |
| 100                                     | exp patient care team/                 |
| 101                                     | exp case management/                   |
| 102                                     | exp office visits/                     |
| 103                                     | exp referral/                          |
| <b>Part 3: Anxiety/Depression terms</b> |                                        |
| 104                                     | exp anxiety/                           |
| 105                                     | (anxiety adj5 disorder\$.tw            |
| 106                                     | exp panic disorder/                    |
| 107                                     | (panic adj5 disorder\$.tw              |
| 108                                     | panic.tw                               |
| 109                                     | (panic adj5 attack\$.tw                |
| 110                                     | fear.tw                                |
| 111                                     | exp depression/                        |
| 112                                     | (depressive adj5 disorder\$.tw         |
