# Supplementary material for: Prevalence of common mental health disorders in adults who are high or costly users of healthcare services: protocol for a systematic review and meta-analysis
Source: PubMed Central journal article supplement — BMJ Open. 2019 Sep 4;9(9):e028295. doi: 10.1136/bmjopen-2018-028295 (PMC6731873; doi:10.1136/bmjopen-2018-028295), 2019-09-04
Supplement: bmjopen-2018-028295supp002.pdf [file bmjopen-2018-028295supp002.pdf]

## Appendix 2 - Data extraction form adapted from the framework of Hayden et al.

### Eligibility criteria for the title and abstract screening phase

#### Inclusion criteria

| Study design                                                                                                                                                                                                                                                                                                                                                                                                                                            | Assessment                    | Comment |
|---------------------------------------------------------------------------------------------------------------------------------------------------------------------------------------------------------------------------------------------------------------------------------------------------------------------------------------------------------------------------------------------------------------------------------------------------------|-------------------------------|---------|
| Is it:<br>[1] A cohort study (prospective or retrospective)<br>[2] A case-control or nested case-control<br>[3] A cross-sectional study                                                                                                                                                                                                                                                                                                                 | Yes<br>No<br>Unclear          |         |
| <b>Population</b>                                                                                                                                                                                                                                                                                                                                                                                                                                       |                               |         |
| [1] Adults aged $\geq 18$ years<br>[2] Patients are high users of health care<br>[2] Patients accrue high health care costs<br>Including: high cost patients, high users, distressed high users/utilisers of care, frequent attenders in primary care, secondary care, frequent attenders at an emergency department<br><br><b>NB:</b> Please answer YES if patients with anxiety/depression are a subgroup; please answer YES if mixed age population. | Yes<br>No<br>Unclear          |         |
| <b>Comparators</b>                                                                                                                                                                                                                                                                                                                                                                                                                                      |                               |         |
| [1] Comparison group includes non-high use OR non-high cost patients<br>[2] Comparison group includes frequent/high users without anxiety/depression                                                                                                                                                                                                                                                                                                    | Yes<br>No<br>Unclear          |         |
| <b>Outcome</b>                                                                                                                                                                                                                                                                                                                                                                                                                                          |                               |         |
| Did the study report any of the following outcomes:<br>[1] Prevalence of anxiety/depression in high users/high cost patients<br>[2] Odds Ratio of use of care between depressed/anxious vs non-depressed/anxious participants                                                                                                                                                                                                                           | Yes<br>No<br>Unclear          |         |
| <b>Final decision (please tick)</b>                                                                                                                                                                                                                                                                                                                                                                                                                     | Include<br>Exclude<br>Unclear |         |

#### Exclusion criteria

| Reasons for exclusion of study from review (please circle where appropriate) |                                                                                                                                                                                                                                                                                                                                                         |
|------------------------------------------------------------------------------|---------------------------------------------------------------------------------------------------------------------------------------------------------------------------------------------------------------------------------------------------------------------------------------------------------------------------------------------------------|
| Study design                                                                 | [1] Clinical trial<br>[2] Case study<br>[3] Qualitative study                                                                                                                                                                                                                                                                                           |
| Population                                                                   | Age: <18<br>All specific medical specialties/illnesses including:<br>[1] Paediatric patients<br>[2] Palliative care<br>[3] Obstetrics<br>[4] Transplant<br>[5] Neurodegenerative disease<br>[6] Oral, maxillofacial, dentistry<br>[7] Nephrology<br>[8] Infectious diseases<br>[9] Virology and HIV/AIDS<br>[10] Physiotherapy<br>[11] Cosmetic surgery |

|              |                                                                                                                                              |
|--------------|----------------------------------------------------------------------------------------------------------------------------------------------|
|              | [12] Psychiatry/mental health services<br>[13] Specific diseases e.g. diabetes, cardiovascular                                               |
| Intervention | [1] Randomised clinical trial<br>[2] Interventions in populations who are not high use/cost<br>[3] Screening/diagnosis/treatment evaluations |
| Comparator   | Studies without non-high cost/non-high users of health care                                                                                  |
| Outcomes     | Relevant outcomes not assessed:<br>[1] No anxiety/depression assessment<br>[2] No assessment of health use OR cost                           |
| Other        | Duplicate publication<br>Other (explain)                                                                                                     |

| <b>Eligibility criteria for Full Text</b>                                                                                    |                                           |
|------------------------------------------------------------------------------------------------------------------------------|-------------------------------------------|
| Satisfaction of eligibility criteria above                                                                                   | Yes<br>No<br>Unclear                      |
| Cost studies will include patients either in the top 1%, 5% 10% and 20% of most costly patients.                             | <b>Yes</b><br><b>No</b><br><b>Unclear</b> |
| Studies of general health care use will include patients in the top 1%, 5%, 10% or 20% of health care use.                   | <b>Yes</b><br><b>No</b><br><b>Unclear</b> |
| Studies in primary care will either include patients with 10 or more visits per year or those patients in the top 10% of use | <b>Yes</b><br><b>No</b><br><b>Unclear</b> |
| Studies of ED will include patients with at least 4 visits per annum.                                                        | Yes<br>No<br>Unclear                      |

### Organisation

| <b>Organisational aspect</b> | <b>Exclude</b>                                                                                                                | <b>Include</b> |
|------------------------------|-------------------------------------------------------------------------------------------------------------------------------|----------------|
| <b>Reviewer/date:</b>        | <b>Checked by:</b>                                                                                                            |                |
| Author/Year                  |                                                                                                                               |                |
| Journal/Source               |                                                                                                                               |                |
| Country of origin            |                                                                                                                               |                |
| Publication type             | Full text/Abstract/Book chapter/progress report/<br>Other – please specify                                                    |                |
| Fate                         | Decision: pending/Checked reference/Use for discussion/Exclude without listing/Exclude with listing<br>Other – please specify |                |
| Notes                        |                                                                                                                               |                |

## Data extraction template for full-text articles

| General study characteristics                                                                                                         |                                                                                                                                                                                                                                                                                                                                                                                                                                                                                                                                                                                                                                                                                                                                                                                                                                                                                                                                                                        |
|---------------------------------------------------------------------------------------------------------------------------------------|------------------------------------------------------------------------------------------------------------------------------------------------------------------------------------------------------------------------------------------------------------------------------------------------------------------------------------------------------------------------------------------------------------------------------------------------------------------------------------------------------------------------------------------------------------------------------------------------------------------------------------------------------------------------------------------------------------------------------------------------------------------------------------------------------------------------------------------------------------------------------------------------------------------------------------------------------------------------|
| Location of study<br>Please specify country, type of health care system, health care setting (primary/secondary care/ED/all settings) |                                                                                                                                                                                                                                                                                                                                                                                                                                                                                                                                                                                                                                                                                                                                                                                                                                                                                                                                                                        |
| Study aims                                                                                                                            | Reported/Not reported                                                                                                                                                                                                                                                                                                                                                                                                                                                                                                                                                                                                                                                                                                                                                                                                                                                                                                                                                  |
| Date of recruitment                                                                                                                   | From _____ to _____<br>Median (range):#<br>Mean:#                                                                                                                                                                                                                                                                                                                                                                                                                                                                                                                                                                                                                                                                                                                                                                                                                                                                                                                      |
| Length of follow-up of outcome of interest + length of follow-up of study                                                             | From _____ to _____<br>Median (range):#<br>Mean (standard deviation):#                                                                                                                                                                                                                                                                                                                                                                                                                                                                                                                                                                                                                                                                                                                                                                                                                                                                                                 |
| Outcome definition                                                                                                                    | [1] Anxiety or depression or both<br>Median (range):#<br>Mean (standard deviation):#<br>[2] Health care use<br>Median (range):#<br>Mean (standard deviation):#<br>[3] Health care cost<br>Median (range):#<br>Mean (standard deviation):#                                                                                                                                                                                                                                                                                                                                                                                                                                                                                                                                                                                                                                                                                                                              |
| Outcome measurement                                                                                                                   | Did the study report measurements for any of the following outcomes:<br>[1] Prevalence of anxiety/depression <ul style="list-style-type: none"> <li>➤ Specify measures of central tendency and variation)</li> <li>➤ Specify instrument and range (e.g. PHQ-9, GAD-7, SCID, etc.)</li> <li>➤ Is it self-report?</li> <li>➤ Is it standardised?</li> <li>➤ Is it validated to context?</li> <li>➤ Is it a standardised clinical interview</li> <li>➤ Is it a clinical interview with diagnosis according to recognised diagnostic system</li> </ul> [2] Magnitude of cost or use of health care associated with the presence of anxiety/depression. Consider: <ul style="list-style-type: none"> <li>➤ Frequency and range of scheduled contacts in primary care, secondary care or ED</li> <li>➤ Cost, range, of contacts in above settings</li> <li>➤ Frequency and range of inpatient admissions</li> <li>➤ Cost, range, currency of inpatient admissions</li> </ul> |
| Covariates/Confounders considered (please detail)                                                                                     | [1] Did the study report measurements used to report: <ul style="list-style-type: none"> <li>➤ Patient characteristics and contexts associated with high service use/costs among patients with anxiety depression?</li> </ul> <i>Please consider patient demographic (e.g. age, ethnicity, gender, homelessness) and clinical factors (e.g. anxiety/depression management, physical comorbidities)</i>                                                                                                                                                                                                                                                                                                                                                                                                                                                                                                                                                                 |
| Relationship between outcome and relevant covariates/confounders                                                                      | Is the relationship statistically significant?<br>Yes/No<br><i>If Yes:</i><br>OR/mean difference (95% confidence intervals):#<br><br><i>If No, offer reason:</i><br>Low powered or inconclusive study<br>A true negative study                                                                                                                                                                                                                                                                                                                                                                                                                                                                                                                                                                                                                                                                                                                                         |

|                                |                                                                                     |
|--------------------------------|-------------------------------------------------------------------------------------|
|                                | Other reasons (please specify)                                                      |
| Power calculation              | Yes/No/Not reported<br><br>Calculated sample size:#<br>Sample size achieved: Yes/No |
| Funding                        | Unclear<br>Not reported<br>Please state where reported                              |
| Conflict of interest statement | Yes/No/Not reported                                                                 |

| Observational study characteristics |                                                                                                                   |
|-------------------------------------|-------------------------------------------------------------------------------------------------------------------|
| Sample size                         |                                                                                                                   |
| Number of excluded patients         |                                                                                                                   |
| Recruitment method                  |                                                                                                                   |
| Type of observational study         | Cohort studies (prospective/retrospective)<br>Case-control studies/nested case-control<br>Cross-sectional studies |
| Are groups comparable               | Yes/No<br><br>If No, please specify                                                                               |
| Any confounders considered?         | Yes/No<br>If Yes, specify which<br><br>If No, please specify                                                      |
| Analyses                            |                                                                                                                   |
| Drop-outs stated                    | Yes/No<br><br>If Yes: number in each group                                                                        |

| Patient characteristics                                                                                                                                   |                               |                        |          |
|-----------------------------------------------------------------------------------------------------------------------------------------------------------|-------------------------------|------------------------|----------|
| Notes: Any relationship with outcomes?<br>Yes/No/Not reported<br><br>If Yes, please state statistical parameters and significance level where appropriate | Exposure (i.e. High use/cost) | Control (Low use/cost) | Comments |
| Number of patients                                                                                                                                        |                               |                        |          |
| Country                                                                                                                                                   |                               |                        |          |
| Age mean/median (standard deviation/range)                                                                                                                |                               |                        |          |
| Ethnicity (Number, %)                                                                                                                                     |                               |                        |          |
| Sex (Number, %)                                                                                                                                           | Male:<br>Female:              | Male:<br>Female:       |          |
| Homelessness specified in study?<br>Yes/No                                                                                                                |                               |                        |          |
| No of patients recruited                                                                                                                                  |                               |                        |          |
| No of patients allocated                                                                                                                                  |                               |                        |          |
| No of patients evaluated                                                                                                                                  |                               |                        |          |
| No of drop-outs                                                                                                                                           |                               |                        |          |
| Reasons for drop-out                                                                                                                                      |                               |                        |          |
| Definition of anxiety/depression in the groups:                                                                                                           |                               |                        |          |

|                                                                                                                                                                                                                                  |  |  |  |
|----------------------------------------------------------------------------------------------------------------------------------------------------------------------------------------------------------------------------------|--|--|--|
| [1] Via standardised questionnaire (validated or not) semi-structured or clinical interview?<br><i>Please specify</i><br>[2] Definition of high/low ranges or diagnosis (yes/no)<br>[3] Is anxiety/depression managed?<br>Yes/No |  |  |  |
| Clinical status at recruitment :<br>[1] Comorbidities<br>Yes/No<br><i>If yes, please state</i><br>Number:                                                                                                                        |  |  |  |
| Adverse event?<br>Yes/No<br><br><i>If Yes, please detail</i>                                                                                                                                                                     |  |  |  |

### Outcome details

*The following table can be copied for every relevant outcome assessed (please fill out fields only where applicable)*

| Outcome assessed                                                                                                                                        |  |
|---------------------------------------------------------------------------------------------------------------------------------------------------------|--|
| Definition of each outcome                                                                                                                              |  |
| Time of assessment of each outcome                                                                                                                      |  |
| Timing of assessment                                                                                                                                    |  |
| Length of follow up for each outcome                                                                                                                    |  |
| Method of measurement                                                                                                                                   |  |
| No of patients evaluated for each outcome, as stated above                                                                                              |  |
| Confounding variables were considered (e.g. age, gender, ethnicity, homelessness, physical comorbidities, managed depression)<br><i>Please list all</i> |  |
| How were the confounding variables controlled?                                                                                                          |  |

| Methodological quality summary                                                                                                     |     |        |             |        |          |
|------------------------------------------------------------------------------------------------------------------------------------|-----|--------|-------------|--------|----------|
| Reviewer/Date:                                                                                                                     |     |        | Checked by: |        |          |
| Contents (please refer to tables below for guidance)                                                                               | Yes | Partly | No          | Unsure | Comments |
| Study participation                                                                                                                |     |        |             |        |          |
| Study attrition                                                                                                                    |     |        |             |        |          |
| Measurement of outcome                                                                                                             |     |        |             |        |          |
| Analytical approach                                                                                                                |     |        |             |        |          |
| Specify confounding variables measurements (e.g. age, gender, ethnicity, homelessness, physical comorbidities, managed depression) |     |        |             |        |          |

|                                                         |                  |                       |                   |  |
|---------------------------------------------------------|------------------|-----------------------|-------------------|--|
| Specify method of controlling for confounding variables |                  |                       |                   |  |
| Summary                                                 | Low risk of bias | Moderate risk of bias | High risk of bias |  |
| Remarks:                                                |                  |                       |                   |  |
