# Supplementary material for: Prevalence of common mental health disorders in adults who are high or costly users of healthcare services: protocol for a systematic review and meta-analysis
Source: PubMed Central journal article supplement — BMJ Open. 2019 Sep 4;9(9):e028295. doi: 10.1136/bmjopen-2018-028295 (PMC6731873; doi:10.1136/bmjopen-2018-028295), 2019-09-04
Supplement: bmjopen-2018-028295supp003.pdf [file bmjopen-2018-028295supp003.pdf]

## Appendix 3

**Quality assessment form adapted from the Ottawa-Newcastle scale (NOS) for assessing non-randomised studies**

|                                              |                                                                                                                                                                                                                                                                                                                                                                                                                                                                                                                                                                                                                                                                                                                                                                     | Yes/No/Unclear |
|----------------------------------------------|---------------------------------------------------------------------------------------------------------------------------------------------------------------------------------------------------------------------------------------------------------------------------------------------------------------------------------------------------------------------------------------------------------------------------------------------------------------------------------------------------------------------------------------------------------------------------------------------------------------------------------------------------------------------------------------------------------------------------------------------------------------------|----------------|
| Selection of participants                    | [1] Was the inclusion/exclusion clearly described? (for example, age, diagnosis status, anxiety/depression)<br>[2] Was inclusion/exclusion assessed using valid and reliable measures? (for example, clinical interview to ascertain anxiety/depression or standardised questionnaires)<br>[3] Was recruitment strategy clearly described?<br>[4] Did the investigators ensure that the exposed/unexposed group were comparable (for example did they use stratification or matching)                                                                                                                                                                                                                                                                               |                |
| Adequate description of study population     | [1] Was study population well characterised?<br>➤ Age<br>➤ Sex<br>➤ Ethnicity<br>➤ Homelessness (yes/no)<br>➤ Suitable definition of anxiety/depression                                                                                                                                                                                                                                                                                                                                                                                                                                                                                                                                                                                                             |                |
| Valid method for evaluating outcome          | [1] Was there a definition provided for the key outcomes:<br>➤ Anxiety/depression caseness or diagnosis<br>➤ Health care use level and range<br>➤ Health care costs and range<br>[2] Was there a method used to ascertain anxiety/depression clearly defined?<br>➤ Standardised questionnaires validated to the setting<br>➤ Standardised questionnaire not validated for the setting<br>➤ Clinical interview based on the ICD or DSM (version specified)<br>➤ Semi-structured research interview based on ICD or DSM version specified<br>[3] Was a valid and reliable measure used to report outcomes? For example<br>➤ Frequency/range of health care use<br>➤ Mean/variation/currency of health care cost<br>➤ Clinical interview/Questionnaire score/variation |                |
| Adequate follow-up period (where applicable) | [1] Was follow-up adequate enough for the outcome to occur?<br>[2] Was follow-up period the same across groups?<br>[3] Were differences in follow-up adjusted for using statistical techniques?                                                                                                                                                                                                                                                                                                                                                                                                                                                                                                                                                                     |                |
| Completeness of follow-up (where applicable) | [1] Were drop-out rates and reasons for drop-out similar across exposed and unexposed?<br>[2] Were numbers of drop-outs/withdrawals documented at each time point?                                                                                                                                                                                                                                                                                                                                                                                                                                                                                                                                                                                                  |                |
| Analysis and control of confounders          | [1] Does the study identify any confounders?<br>[2] Does the study control for these confounders?                                                                                                                                                                                                                                                                                                                                                                                                                                                                                                                                                                                                                                                                   |                |
| Sample size calculation                      | [1] Is the sample size adequate?<br>[2] Did the study describe how the sample size was calculated?<br>[3] Was the sample size large enough to detect differences in events between groups? (i.e. mean change)                                                                                                                                                                                                                                                                                                                                                                                                                                                                                                                                                       |                |
| Analytical methods appropriate               | [1] Was the type of analysis appropriate for the type of outcome data? For example:                                                                                                                                                                                                                                                                                                                                                                                                                                                                                                                                                                                                                                                                                 |                |

|  |                                                                                                                                                                                                                                                                                               |  |
|--|-----------------------------------------------------------------------------------------------------------------------------------------------------------------------------------------------------------------------------------------------------------------------------------------------|--|
|  | <ul style="list-style-type: none"><li>➤ Continuous – Mixed model, ANCOVA</li><li>➤ Categorical - Mixed model for categorical outcome</li><li>➤ Dichotomous – Logistic regression</li></ul> <p>[2] Was loss to follow-up accounted for in the analysis (e.g. through sensitivity analysis)</p> |  |
|--|-----------------------------------------------------------------------------------------------------------------------------------------------------------------------------------------------------------------------------------------------------------------------------------------------|--|

**Abbreviations**

PROSPERO: Prospective Registering of Systematic Reviews; CINAHL: Cumulative Index for Nursing and Allied Health Literature; NHS: National Health Service; GP: General Practitioner; ED: Emergency Department; ANCOVA: Analysis of Covariance; PRISMA: Preferred Reporting Items for Systematic Reviews and Meta-Analysis; NOS: The Newcastle – Ottawa Scale; PHQ-9: Patient Health Questionnaire-9; GAD-7: Generalised Anxiety Disorder Assessment-7; SCID: Structured Clinical Interview for DSM; ICD: International Classification of Diseases; DSM: Diagnostic and Statistical Manual of Mental Disorders.
